# Supplementary material for: Inventory of Patient-Reported Outcome Measures Used in the Non-Operative Care of Scoliosis: A Scoping Review
Source: MDPI journal article supplement (doi:10.3390/children10020239), 2023-01-29
Supplement: s1 [file s1]

## Covidence Study

## Reference

|      |                 |                                                                                                                                                                                                                                                                                                                                                                                                                                                                        |
|------|-----------------|------------------------------------------------------------------------------------------------------------------------------------------------------------------------------------------------------------------------------------------------------------------------------------------------------------------------------------------------------------------------------------------------------------------------------------------------------------------------|
| #56  | Sponseller 1987 | Sponseller, P D; Cohen, M S; Nachemson, A L; Hall, J E; Wohl, M E. Results of surgical treatment of adults with idiopathic scoliosis. The Journal of bone and joint surgery. American volume, 1987, 69, 5, 667-75. .                                                                                                                                                                                                                                                   |
| #74  | MacLean 1989    | MacLean, W E Jr; Green, N E; Pierre, C B; Ray, D C. Stress and coping with scoliosis: psychological effects on adolescents and their families. Journal of pediatric orthopedics, 1989, 9, 3, 257-61. .                                                                                                                                                                                                                                                                 |
| #131 | Cordover 1997   | Cordover, A M; Betz, R R; Clements, D H; Bosacco, S J. Natural history of adolescent thoracolumbar and lumbar idiopathic scoliosis into adulthood. Journal of spinal disorders, 1997, 10, 3, 193-6. .                                                                                                                                                                                                                                                                  |
| #206 | Asher 2002      | Asher, Marc; Lai, Sue Min; Burton, Doug; Manna, Barbara. Spine deformity correlates better than trunk deformity with idiopathic scoliosis patients' quality of life questionnaire responses. Studies in health technology and informatics, 2002, 91, ck1, 9214582, 462-4. .                                                                                                                                                                                            |
| #229 | Danielsson 2003 | Danielsson, Aina J; Nachemson, Alf L. Back pain and function 22 years after brace treatment for adolescent idiopathic scoliosis: a case-control study-part I. Spine, 2003, 28, 18, 2078-2086. .                                                                                                                                                                                                                                                                        |
| #234 | Sanders 2003    | Sanders, James O; Polly, David W Jr; Cats-Baril, William; Jones, JoAnn; Lenke, Larry G; O'Brien, Michael F; Stephens Richards, B; Sucato, Daniel J; AIS Section of the Spinal Deformity Study Group. Analysis of patient and parent assessment of deformity in idiopathic scoliosis using the Walter Reed Visual Assessment Scale. Spine, 2003, 28, 18, 2158-63. .                                                                                                     |
| #315 | Weigert 2006    | Weigert, Karen Petra; Nygaard, Linda Marie; Christensen, Finn Bjarke; Hansen, Ebbe Stender; Bunger, Cody. Outcome in adolescent idiopathic scoliosis after brace treatment and surgery assessed by means of the Scoliosis Research Society Instrument 24. European spine journal : official publication of the European Spine Society, the European Spinal Deformity Society, and the European Section of the Cervical Spine Research Society, 2006, 15, 7, 1108-17. . |

|      |                 |                                                                                                                                                                                                                                                                                                                                                                                                                                                                                      |
|------|-----------------|--------------------------------------------------------------------------------------------------------------------------------------------------------------------------------------------------------------------------------------------------------------------------------------------------------------------------------------------------------------------------------------------------------------------------------------------------------------------------------------|
| #321 | Andersen 2006   | Andersen, Mikkell O; Christensen, Steen B; Thomsen, Karsten. Outcome at 10 years after treatment for adolescent idiopathic scoliosis. Spine, 2006, 31, 3, 350-4. .                                                                                                                                                                                                                                                                                                                   |
| #322 | Haefeli 2006    | Haefeli, Mathias; Elfering, Achim; Kilian, Reinhold; Min, Kan; Boos, Norbert. Nonoperative treatment for adolescent idiopathic scoliosis: a 10- to 60-year follow-up with special reference to health-related quality of life. Spine, 2006, 31, 3, 355-367. .                                                                                                                                                                                                                        |
| #328 | Glassman 2006   | Glassman, Steven D; Berven, Sigurd; Kostuik, John; Dimar, John R; Horton, William C; Bridwell, Keith. Nonsurgical resource utilization in adult spinal deformity. Spine, 2006, 31, 8, 941-7. .                                                                                                                                                                                                                                                                                       |
| #335 | Beka 2006       | Beka, Anastasia; Dermitzaki, Irini; Christodoulou, Anastasios; Kapetanios, George; Markovitis, Marios; Pournaras, John. Children and adolescents with idiopathic scoliosis: emotional reactions, coping mechanisms, and self-esteem. Psychological reports, 2006, 98, 2, 477-85. .                                                                                                                                                                                                   |
| #353 | Crawford 2006   | Crawford, John R; Izatt, Maree T; Adam, Clayton J; Labrom, Robert D; Askin, Geoffrey N. A prospective assessment of SRS-24 scores after endoscopic anterior instrumentation for scoliosis. Spine, 2006, 31, 21, E817-22. .                                                                                                                                                                                                                                                           |
| #363 | Vasiliadis 2006 | Vasiliadis, Elias; Grivas, Theodoros B; Savvidou, Olga; Triantafyllopoulos, Georgios. The influence of brace on quality of life of adolescents with idiopathic scoliosis. Studies in health technology and informatics, 2006, 123, ck1, 9214582, 352-6. .                                                                                                                                                                                                                            |
| #364 | Parent 2006     | Parent, E C; Hill, D; Mahood, J; Moreau, M; Lou, E; Raso, J. Associations between quality-of-life and internal or external spinal deformity measurements in adolescent with idiopathic scoliosis (AIS). Studies in health technology and informatics, 2006, 123, ck1, 9214582, 357-63. .                                                                                                                                                                                             |
| #377 | Bunge 2007      | Bunge, Eveline M; Juttmann, Rikard E; de Kleuver, Marinus; van Biezen, Frans C; de Koning, Harry J; NESICIO group. Health-related quality of life in patients with adolescent idiopathic scoliosis after treatment: short-term effects after brace or surgical treatment. European spine journal : official publication of the European Spine Society, the European Spinal Deformity Society, and the European Section of the Cervical Spine Research Society, 2007, 16, 1, 30560. . |

|      |                 |                                                                                                                                                                                                                                                                                                                                                                                                                                                                                                                                                                          |
|------|-----------------|--------------------------------------------------------------------------------------------------------------------------------------------------------------------------------------------------------------------------------------------------------------------------------------------------------------------------------------------------------------------------------------------------------------------------------------------------------------------------------------------------------------------------------------------------------------------------|
| #393 | Kluba 2009      | Kluba, Torsten; Dikmenli, Gulden; Dietz, Klaus; Giehl, Johannes P; Niemeyer, Thomas. Comparison of surgical and conservative treatment for degenerative lumbar scoliosis. Archives of orthopaedic and trauma surgery, 2009, 129, 1, 44566. <a href="https://dx.doi.org/10.1007/s00402-008-0673-z">https://dx.doi.org/10.1007/s00402-008-0673-z</a> .                                                                                                                                                                                                                     |
| #398 | Lerner 2009     | Lerner, Thomas; Bullmann, Viola; Schulte, Tobias L; Schneider, Marc; Liljenqvist, Ulf. A level-1 pilot study to evaluate of ultraporous beta-tricalcium phosphate as a graft extender in the posterior correction of adolescent idiopathic scoliosis. European spine journal : official publication of the European Spine Society, the European Spinal Deformity Society, and the European Section of the Cervical Spine Research Society, 2009, 18, 2, 170-9. <a href="https://dx.doi.org/10.1007/s00586-008-0844-1">https://dx.doi.org/10.1007/s00586-008-0844-1</a> . |
| #409 | Lonner 2009     | Lonner, Baron S; Auerbach, Joshua D; Estreicher, Michael; Milby, Andrew H; Kean, Kristin E; Panagopoulos, Georgia; Chang, David. Video-assisted anterior thoracoscopic spinal fusion versus posterior spinal fusion: a comparative study utilizing the SRS-22 outcome instrument. Spine, 2009, 34, 2, 193-8. <a href="https://dx.doi.org/10.1097/BRS.0b013e318191e9e8">https://dx.doi.org/10.1097/BRS.0b013e318191e9e8</a> .                                                                                                                                             |
| #410 | Rivett 2009     | Rivett, LouAnn; Rothberg, Alan; Stewart, Aimee; Berkowitz, Rowan. The relationship between quality of life and compliance to a brace protocol in adolescents with idiopathic scoliosis: a comparative study. BMC musculoskeletal disorders, 2009, 10, 100968565, 5. <a href="https://dx.doi.org/10.1186/1471-2474-10-5">https://dx.doi.org/10.1186/1471-2474-10-5</a> .                                                                                                                                                                                                  |
| #411 | Lonner 2009     | Lonner, Baron S; Auerbach, Joshua D; Estreicher, Michael; Milby, Andrew H; Kean, Kristin E. Video-assisted thoracoscopic spinal fusion compared with posterior spinal fusion with thoracic pedicle screws for thoracic adolescent idiopathic scoliosis. The Journal of bone and joint surgery. American volume, 2009, 91, 2, 398-408. <a href="https://dx.doi.org/10.2106/JBJS.G.01044">https://dx.doi.org/10.2106/JBJS.G.01044</a> .                                                                                                                                    |
| #421 | Beausejour 2009 | Beausejour, Marie; Joncas, Julie; Goulet, Lise; Roy-Beaudry, Marjolaine; Parent, Stefan; Grimard, Guy; Forcier, Martin; Lauriault, Sophie; Labelle, Hubert. Reliability and validity of adapted French Canadian version of Scoliosis Research Society Outcomes Questionnaire (SRS-22) in Quebec. Spine, 2009, 34, 6, 623-8. <a href="https://dx.doi.org/10.1097/BRS.0b013e3181973e58">https://dx.doi.org/10.1097/BRS.0b013e3181973e58</a> .                                                                                                                              |
| #422 | Liao 2009       | Liao, Jen-Chung; Chen, Wen-Jer; Chen, Lih-Huei; Niu, Chi-Chien. Outcome of the L5-S1 segment after posterior instrumented spinal surgery in degenerative lumbar diseases. Chang Gung medical journal, 2009, 32, 1, 29799. .                                                                                                                                                                                                                                                                                                                                              |
| #426 | Newton 2009     | Newton, Peter O; Upasani, Vidyadhar V; Bastrom, Tracey P; Marks, Michelle C. The deformity-flexibility quotient predicts both patient satisfaction and surgeon preference in the treatment of Lenke 1B or 1C curves for adolescent idiopathic scoliosis. Spine, 2009, 34, 10, 1032-9. <a href="https://dx.doi.org/10.1097/BRS.0b013e31819c97f8">https://dx.doi.org/10.1097/BRS.0b013e31819c97f8</a> .                                                                                                                                                                    |

|      |                 |                                                                                                                                                                                                                                                                                                                                                                                                                                                                                                                                         |
|------|-----------------|-----------------------------------------------------------------------------------------------------------------------------------------------------------------------------------------------------------------------------------------------------------------------------------------------------------------------------------------------------------------------------------------------------------------------------------------------------------------------------------------------------------------------------------------|
| #427 | Pekmezci 2009   | Pekmezci, Murat; Berven, Sigurd H; Hu, Serena S; Deviren, Vedat. The factors that play a role in the decision-making process of adult deformity patients. Spine, 2009, 34, 8, 813-7. <a href="https://dx.doi.org/10.1097/BRS.0b013e3181851ba6">https://dx.doi.org/10.1097/BRS.0b013e3181851ba6</a> .                                                                                                                                                                                                                                    |
| #450 | Bago 2009       | Bago, Juan; Perez-Grueso, Francisco J S; Les, Esther; Hernandez, Pablo; Pellise, Ferran. Minimal important differences of the SRS-22 Patient Questionnaire following surgical treatment of idiopathic scoliosis. European spine journal : official publication of the European Spine Society, the European Spinal Deformity Society, and the European Section of the Cervical Spine Research Society, 2009, 18, 12, 1898-904. <a href="https://dx.doi.org/10.1007/s00586-009-1066-x">https://dx.doi.org/10.1007/s00586-009-1066-x</a> . |
| #452 | Mac-Thiong 2009 | Mac-Thiong, Jean-Marc; Transfeldt, Ensor E; Mehbod, Amir A; Perra, Joseph H; Denis, Francis; Garvey, Timothy A; Lonstein, John E; Wu, Chunhui; Dorman, Christopher W; Winter, Robert B. Can c7 plumbline and gravity line predict health related quality of life in adult scoliosis?. Spine, 2009, 34, 15, E519-27. <a href="https://dx.doi.org/10.1097/BRS.0b013e3181a9c7ad">https://dx.doi.org/10.1097/BRS.0b013e3181a9c7ad</a> .                                                                                                     |
| #454 | Ploumis 2009    | Ploumis, Avraam; Liu, Hong; Mehbod, Amir A; Transfeldt, Ensor E; Winter, Robert B. A correlation of radiographic and functional measurements in adult degenerative scoliosis. Spine, 2009, 34, 15, 1581-4. <a href="https://dx.doi.org/10.1097/BRS.0b013e31819c94cc">https://dx.doi.org/10.1097/BRS.0b013e31819c94cc</a> .                                                                                                                                                                                                              |
| #456 | Smith 2009      | Smith, Justin S; Shaffrey, Christopher I; Berven, Sigurd; Glassman, Steven; Hamill, Christopher; Horton, William; Ondra, Stephen; Schwab, Frank; Shainline, Michael; Fu, Kai-Ming; Bridwell, Keith; Spinal Deformity Study Group. Improvement of back pain with operative and nonoperative treatment in adults with scoliosis. Neurosurgery, 2009, 65, 1, 31503. <a href="https://dx.doi.org/10.1227/01.NEU.0000347005.35282.6C">https://dx.doi.org/10.1227/01.NEU.0000347005.35282.6C</a> .                                            |
| #459 | Lafage 2009     | Lafage, Virginie; Schwab, Frank; Patel, Ashish; Hawkinson, Nicola; Farcy, Jean-Pierre. Pelvic tilt and truncal inclination: two key radiographic parameters in the setting of adults with spinal deformity. Spine, 2009, 34, 17, E599-606. <a href="https://dx.doi.org/10.1097/BRS.0b013e3181aad219">https://dx.doi.org/10.1097/BRS.0b013e3181aad219</a> .                                                                                                                                                                              |
| #460 | Misterska 2009  | Misterska, Ewa; Glowacki, Maciej; Harasymczuk, Jerzy. Polish adaptation of Bad Sobernheim Stress Questionnaire-Brace and Bad Sobernheim Stress Questionnaire-Deformity. European spine journal : official publication of the European Spine Society, the European Spinal Deformity Society, and the European Section of the Cervical Spine Research Society, 2009, 18, 12, 4262. <a href="https://dx.doi.org/10.1007/s00586-009-1126-2">https://dx.doi.org/10.1007/s00586-009-1126-2</a> .                                              |

|      |                 |                                                                                                                                                                                                                                                                                                                                                                                                                                                                                                                                                      |
|------|-----------------|------------------------------------------------------------------------------------------------------------------------------------------------------------------------------------------------------------------------------------------------------------------------------------------------------------------------------------------------------------------------------------------------------------------------------------------------------------------------------------------------------------------------------------------------------|
| #463 | Tsutsui 2009    | Tsutsui, Shunji; Pawelek, Jeff; Bastrom, Tracey; Lenke, Lawrence; Lowe, Thomas; Betz, Randal; Clements, David; Newton, Peter O. Dissecting the effects of spinal fusion and deformity magnitude on quality of life in patients with adolescent idiopathic scoliosis. Spine, 2009, 34, 18, E653-8. <a href="https://dx.doi.org/10.1097/BRS.0b013e3181b2008f">https://dx.doi.org/10.1097/BRS.0b013e3181b2008f</a> .                                                                                                                                    |
| #472 | Li 2009         | Li, Gang; Passias, Peter; Kozanek, Michal; Fu, Eric; Wang, Shaobai; Xia, Qun; Li, Guoan; Rand, Frank E; Wood, Kirkham B. Adult scoliosis in patients over sixty-five years of age: outcomes of operative versus nonoperative treatment at a minimum two-year follow-up. Spine, 2009, 34, 20, 2165-70. <a href="https://dx.doi.org/10.1097/BRS.0b013e3181b3ff0c">https://dx.doi.org/10.1097/BRS.0b013e3181b3ff0c</a> .                                                                                                                                |
| #480 | Crandall 2009   | Crandall, Dennis G; Revella, Jan. Transforaminal lumbar interbody fusion versus anterior lumbar interbody fusion as an adjunct to posterior instrumented correction of degenerative lumbar scoliosis: three year clinical and radiographic outcomes. Spine, 2009, 34, 20, 2126-33. <a href="https://dx.doi.org/10.1097/BRS.0b013e3181b612db">https://dx.doi.org/10.1097/BRS.0b013e3181b612db</a> .                                                                                                                                                   |
| #481 | Bridwell 2009   | Bridwell, Keith H; Glassman, Steven; Horton, William; Shaffrey, Christopher; Schwab, Frank; Zebala, Lukas P; Lenke, Lawrence G; Hilton, Joan F; Shainline, Michael; Baldus, Christine; Wootten, David. Does treatment (nonoperative and operative) improve the two-year quality of life in patients with adult symptomatic lumbar scoliosis: a prospective multicenter evidence-based medicine study. Spine, 2009, 34, 20, 99195. <a href="https://dx.doi.org/10.1097/BRS.0b013e3181a8fdc8">https://dx.doi.org/10.1097/BRS.0b013e3181a8fdc8</a> .    |
| #482 | Bess 2009       | Bess, Shay; Boachie-Adjei, Oheneba; Burton, Doug; Cunningham, Matthew; Shaffrey, Chris; Shelokov, Alexis; Hostin, Richard; Schwab, Frank; Wood, Kirkham; Akbarnia, Behrooz; International Spine Study Group. Pain and disability determine treatment modality for older patients with adult scoliosis, while deformity guides treatment for younger patients. Spine, 2009, 34, 20, 2186-90. <a href="https://dx.doi.org/10.1097/BRS.0b013e3181b05146">https://dx.doi.org/10.1097/BRS.0b013e3181b05146</a> .                                          |
| #486 | Smith 2009      | Smith, Justin S; Shaffrey, Christopher I; Berven, Sigurd; Glassman, Steven; Hamill, Christopher; Horton, William; Ondra, Stephen; Schwab, Frank; Shainline, Michael; Fu, Kai-Ming G; Bridwell, Keith; Spinal Deformity Study Group. Operative versus nonoperative treatment of leg pain in adults with scoliosis: a retrospective review of a prospective multicenter database with two-year follow-up. Spine, 2009, 34, 16, 1693-8. <a href="https://dx.doi.org/10.1097/BRS.0b013e3181ac5fcd">https://dx.doi.org/10.1097/BRS.0b013e3181ac5fcd</a> . |
| #506 | Gorzkowicz 2009 | Gorzkowicz, Bozena; Kolban, Maciej; Szych, Zbigniew. Assessment of quality of life in patients with idiopathic scoliosis treated operatively. Ortopedia, traumatologia, rehabilitacja, 2009, 11, 6, 530-41. .                                                                                                                                                                                                                                                                                                                                        |

|      |                 |                                                                                                                                                                                                                                                                                                                                                                                                                                                                                |
|------|-----------------|--------------------------------------------------------------------------------------------------------------------------------------------------------------------------------------------------------------------------------------------------------------------------------------------------------------------------------------------------------------------------------------------------------------------------------------------------------------------------------|
| #515 | Fu 2010         | Fu, Kai-Ming G; Smith, Justin S; Sansur, Charles A; Shaffrey, Christopher I. Standardized measures of health status and disability and the decision to pursue operative treatment in elderly patients with degenerative scoliosis. <i>Neurosurgery</i> , 2010, 66, 1, 42-47. <a href="https://dx.doi.org/10.1227/01.NEU.0000361999.29279.E6">https://dx.doi.org/10.1227/01.NEU.0000361999.29279.E6</a> .                                                                       |
| #518 | Danielsson 2010 | Danielsson, Aina J; Hasserijs, Ralph; Ohlin, Acke; Nachemson, Alf L. Health-related quality of life in untreated versus brace-treated patients with adolescent idiopathic scoliosis: a long-term follow-up. <i>Spine</i> , 2010, 35, 2, 199-205. <a href="https://dx.doi.org/10.1097/BRS.0b013e3181c89f4a">https://dx.doi.org/10.1097/BRS.0b013e3181c89f4a</a> .                                                                                                               |
| #541 | Glassman 2010   | Glassman, Steven D; Carreon, Leah Y; Shaffrey, Christopher I; Polly, David W; Ondra, Stephen L; Berven, Sigurd H; Bridwell, Keith H. The costs and benefits of nonoperative management for adult scoliosis. <i>Spine</i> , 2010, 35, 5, 578-82. <a href="https://dx.doi.org/10.1097/BRS.0b013e3181b0f2f8">https://dx.doi.org/10.1097/BRS.0b013e3181b0f2f8</a> .                                                                                                                |
| #545 | Parent 2010     | Parent, Eric C; Dang, Rohan; Hill, Doug; Mahood, Jim; Moreau, Marc; Raso, Jim; Lou, Edmond. Score distribution of the scoliosis research society-22 questionnaire in subgroups of patients of all ages with idiopathic scoliosis. <i>Spine</i> , 2010, 35, 5, 568-77. <a href="https://dx.doi.org/10.1097/BRS.0b013e3181b9c9c0">https://dx.doi.org/10.1097/BRS.0b013e3181b9c9c0</a> .                                                                                          |
| #575 | Carreon 2010    | Carreon, Leah Y; Sanders, James O; Diab, Mohammad; Sucato, Daniel J; Sturm, Peter F; Glassman, Steven D; Spinal Deformity Study Group. The minimum clinically important difference in Scoliosis Research Society-22 Appearance, Activity, And Pain domains after surgical correction of adolescent idiopathic scoliosis. <i>Spine</i> , 2010, 35, 23, 2079-83. <a href="https://dx.doi.org/10.1097/BRS.0b013e3181c61fd7">https://dx.doi.org/10.1097/BRS.0b013e3181c61fd7</a> . |
| #579 | Lin 2010        | Lin, Jiu-jenq; Chen, Wei-Hsiu; Chen, Po-Quang; Tsauo, Jau-Yih. Alteration in shoulder kinematics and associated muscle activity in people with idiopathic scoliosis. <i>Spine</i> , 2010, 35, 11, 1151-7. <a href="https://dx.doi.org/10.1097/BRS.0b013e3181cd5923">https://dx.doi.org/10.1097/BRS.0b013e3181cd5923</a> .                                                                                                                                                      |
| #586 | Negrini 2010    | Negrini, Stefano; Minozzi, Silvia; Bettany-Saltikov, Josette; Zaina, Fabio; Chockalingam, Nachiappan; Grivas, Theodoros B; Kotwicki, Tomasz; Maruyama, Toru; Romano, Michele; Vasiliadis, Elias S. Braces for idiopathic scoliosis in adolescents. <i>The Cochrane database of systematic reviews</i> , 2010, , 1, CD006850. <a href="https://dx.doi.org/10.1002/14651858.CD006850.pub2">https://dx.doi.org/10.1002/14651858.CD006850.pub2</a> .                               |
| #589 | Keorochana 2010 | Keorochana, Gun; Tawonsawatruk, Tulyapruet; Laohachareonsombat, Wichien; Wajanavisit, Wiwat; Jaovisidha, Suphaneewan. The results of decompression and instrumented fusion with pedicular screw plate system in degenerative lumbar scoliosis patients with spinal stenosis: a prospective observational study. <i>Journal of the Medical Association of Thailand = Chotmaihet thangphaet</i> , 2010, 93, 4, 457-61. .                                                         |

|      |                    |                                                                                                                                                                                                                                                                                                                                                                                                                                                                                                                                                                                                    |
|------|--------------------|----------------------------------------------------------------------------------------------------------------------------------------------------------------------------------------------------------------------------------------------------------------------------------------------------------------------------------------------------------------------------------------------------------------------------------------------------------------------------------------------------------------------------------------------------------------------------------------------------|
| #612 | Lubicky 2011       | Lubicky, John P; Hanson, Jean E; Riley, Elizabeth H; Spinal Deformity Study Group. Instrumentation constructs in pediatric patients undergoing deformity correction correlated with Scoliosis Research Society scores. Spine, 2011, 36, 20, 1692-700.<br><a href="https://dx.doi.org/10.1097/BRS.0b013e3182102c6a">https://dx.doi.org/10.1097/BRS.0b013e3182102c6a</a> .                                                                                                                                                                                                                           |
| #624 | Misterska 2011     | Misterska, Ewa; Glowacki, Maciej; Ignys-O'Byrne, Anna; Latuszewska, Joanna; Lewandowski, Jacek; Ignys, Iwona; Krauss, Hanna; Piatek, Jacek. Differences in deformity and bracing-related stress between rural and urban area patients with adolescent idiopathic scoliosis treated with a Cheneau brace. Annals of agricultural and environmental medicine : AAEM, 2011, 18, 2, 410-4. .                                                                                                                                                                                                           |
| #644 | Bago 2012          | Bago, Joan; Perez-Grueso, Francisco Javier Sanchez; Pellise, Ferran; Les, Esther. How do idiopathic scoliosis patients who improve after surgery differ from those who do not exceed a minimum detectable change?. European spine journal : official publication of the European Spine Society, the European Spinal Deformity Society, and the European Section of the Cervical Spine Research Society, 2012, 21, 1, 18415.<br><a href="https://dx.doi.org/10.1007/s00586-011-2017-x">https://dx.doi.org/10.1007/s00586-011-2017-x</a> .                                                           |
| #649 | O'Shaughnessy 2012 | O'Shaughnessy, Brian A; Bridwell, Keith H; Lenke, Lawrence G; Cho, Woojin; Baldus, Christine; Chang, Michael S; Auerbach, Joshua D; Crawford, Charles H. Does a long-fusion "T3-sacrum" portend a worse outcome than a short-fusion "T10-sacrum" in primary surgery for adult scoliosis?. Spine, 2012, 37, 10, 884-90. <a href="https://dx.doi.org/10.1097/BRS.0b013e3182376414">https://dx.doi.org/10.1097/BRS.0b013e3182376414</a> .                                                                                                                                                             |
| #653 | Danielsson 2012    | Danielsson, Aina J; Hasserijs, Ralph; Ohlin, Acke; Nachemson, Alf L. Body appearance and quality of life in adult patients with adolescent idiopathic scoliosis treated with a brace or under observation alone during adolescence. Spine, 2012, 37, 9, 755-62.<br><a href="https://dx.doi.org/10.1097/BRS.0b013e318231493c">https://dx.doi.org/10.1097/BRS.0b013e318231493c</a> .                                                                                                                                                                                                                 |
| #660 | Morse 2012         | Morse, Lee Jae; Kawakami, Noriaki; Lenke, Lawrence G; Sucato, Daniel J; Sanders, James O; Diab, Mohammad. Culture and ethnicity influence outcomes of the Scoliosis Research Society Instrument in adolescent idiopathic scoliosis. Spine, 2012, 37, 12, 1072-6.<br><a href="https://dx.doi.org/10.1097/BRS.0b013e31823ed962">https://dx.doi.org/10.1097/BRS.0b013e31823ed962</a> .                                                                                                                                                                                                                |
| #678 | Min 2012           | Min, Kan; Haefeli, Mathias; Mueller, Daniel; Klammer, Georg; Hahn, Frederik. Anterior short correction in thoracic adolescent idiopathic scoliosis with mini-open thoracotomy approach: prospective clinical, radiological and pulmonary function results. European spine journal : official publication of the European Spine Society, the European Spinal Deformity Society, and the European Section of the Cervical Spine Research Society, 2012, 21 Suppl 6, 9301980, b9y, S765-72. <a href="https://dx.doi.org/10.1007/s00586-012-2156-8">https://dx.doi.org/10.1007/s00586-012-2156-8</a> . |
| #679 | Zeng 2012          | Zeng, Yan; White, Andrew P; Albert, Todd J; Chen, Zhongqiang. Surgical strategy in adult lumbar scoliosis: the utility of categorization into 2 groups based on primary symptom, each with 2-year minimum follow-up. Spine, 2012, 37, 9, E556-61.<br><a href="https://dx.doi.org/10.1097/BRS.0b013e31824af5c6">https://dx.doi.org/10.1097/BRS.0b013e31824af5c6</a> .                                                                                                                                                                                                                               |

|      |                 |                                                                                                                                                                                                                                                                                                                                                                                         |
|------|-----------------|-----------------------------------------------------------------------------------------------------------------------------------------------------------------------------------------------------------------------------------------------------------------------------------------------------------------------------------------------------------------------------------------|
| #681 | Deceuninck 2012 | Deceuninck, J; Bernard, J C. Quality of life and brace-treated idiopathic scoliosis: a cross-sectional study performed at the Centre des Massues on a population of 120 children and adolescents. Annals of physical and rehabilitation medicine, 2012, 55, 2, 93-102.<br><a href="https://dx.doi.org/10.1016/j.rehab.2011.12.003">https://dx.doi.org/10.1016/j.rehab.2011.12.003</a> . |
| #683 | Misterska 2012  | Misterska, Ewa; Glowacki, Maciej; Latuszewska, Joanna. Female patients' and parents' assessment of deformity- and brace-related stress in the conservative treatment of adolescent idiopathic scoliosis. Spine, 2012, 37, 14, 1218-23.<br><a href="https://dx.doi.org/10.1097/BRS.0b013e31824b66d4">https://dx.doi.org/10.1097/BRS.0b013e31824b66d4</a> .                               |
| #685 | Rothenfluh 2012 | Rothenfluh, Dominique A; Neubauer, Georg; Klasen, Juergen; Min, Kan. Analysis of internal construct validity of the SRS-24 questionnaire. European spine journal : official publication of the European Spine Society, the European Spinal Deformity Society, and the European Section of the Cervical Spine Research Society, 2012, 21, 8, 1590-5. .                                   |
| #702 | Glassman 2007   | Glassman, Steven D; Schwab, Frank J; Bridwell, Keith H; Ondra, Stephen L; Berven, Sigurd; Lenke, Lawrence G. The selection of operative versus nonoperative treatment in patients with adult scoliosis. Spine, 2007, 32, 1, 34151. .                                                                                                                                                    |
| #741 | Parent 2007     | Parent, Eric C; Hill, Doug; Moreau, Marc; Mahood, Jim; Raso, Jim; Lou, Edmond. Score distribution of the Scoliosis Quality of Life Index questionnaire in different subgroups of patients with adolescent idiopathic scoliosis. Spine, 2007, 32, 16, 1767-77. .                                                                                                                         |
| #742 | Glattes 2007    | Glattes, R Christopher; Burton, Douglas C; Lai, Sue Min; Frasier, Elizabeth; Asher, Marc A. The reliability and concurrent validity of the Scoliosis Research Society-22r patient questionnaire compared with the Child Health Questionnaire-CF87 patient questionnaire for adolescent spinal deformity. Spine, 2007, 32, 16, 1778-84. .                                                |
| #763 | Watanabe 2007   | Watanabe, Kei; Lenke, Lawrence G; Bridwell, Keith H; Hasegawa, Kazuhiro; Hirano, Toru; Endo, Naoto; Cheh, Gene; Kim, Yongjung J; Hensley, Marsha; Stobbs, Georgia; Koester, Linda. Cross-cultural comparison of the Scoliosis Research Society Outcomes Instrument between American and Japanese idiopathic scoliosis patients: are there differences?. Spine, 2007, 32, 24, 296303. .  |
| #764 | Howard 2007     | Howard, Andrew; Donaldson, Sandra; Hedden, Douglas; Stephens, Derek; Alman, Benjamin; Wright, James. Improvement in quality of life following surgery for adolescent idiopathic scoliosis. Spine, 2007, 32, 24, 297886. .                                                                                                                                                               |



|      |                 |                                                                                                                                                                                                                                                                                                                                                                                                                                                                                                                      |
|------|-----------------|----------------------------------------------------------------------------------------------------------------------------------------------------------------------------------------------------------------------------------------------------------------------------------------------------------------------------------------------------------------------------------------------------------------------------------------------------------------------------------------------------------------------|
| #765 | Sanders 2007    | Sanders, James O; Harrast, John J; Kuklo, Timothy R; Polly, David W; Bridwell, Keith H; Diab, Mohammad; Dormans, John P; Drummond, Denis S; Emans, John B; Johnston, Charles E 2nd; Lenke, Lawrence G; McCarthy, Richard E; Newton, Peter O; Richards, B Stephens; Sucato, Daniel J; Spinal Deformity Study Group. The Spinal Appearance Questionnaire: results of reliability, validity, and responsiveness testing in patients with idiopathic scoliosis. <i>Spine</i> , 2007, 32, 24, 2719-22. .                  |
| #766 | Schwab 2007     | Schwab, Frank; Lafage, Virginie; Farcy, Jean-Pierre; Bridwell, Keith; Glassman, Steven; Ondra, Stephen; Lowe, Tom; Shainline, Michael. Surgical rates and operative outcome analysis in thoracolumbar and lumbar major adult scoliosis: application of the new adult deformity classification. <i>Spine</i> , 2007, 32, 24, 2723-30. .                                                                                                                                                                               |
| #799 | Peelle 2008     | Peelle, Michael W; Boachie-Adjei, Oheneba; Charles, Gina; Kanazawa, Yamuna; Mesfin, Addisu. Lumbar curve response to selective thoracic fusion in adult idiopathic scoliosis. <i>The spine journal : official journal of the North American Spine Society</i> , 2008, 8, 6, 897-903. <a href="https://dx.doi.org/10.1016/j.spinee.2007.11.010">https://dx.doi.org/10.1016/j.spinee.2007.11.010</a> .                                                                                                                 |
| #808 | Morton 2008     | Morton, Anne; Riddle, Russ; Buchanan, Renee; Katz, Don; Birch, John. Accuracy in the prediction and estimation of adherence to bracewear before and during treatment of adolescent idiopathic scoliosis. <i>Journal of pediatric orthopedics</i> , 2008, 28, 3, 336-41. <a href="https://dx.doi.org/10.1097/BPO.0b013e318168d154">https://dx.doi.org/10.1097/BPO.0b013e318168d154</a> .                                                                                                                              |
| #809 | Mulcahey 2008   | Mulcahey, M J; Haley, Stephen M; Duffy, Theresa; Pengsheng, Ni; Betz, Randal R. Measuring physical functioning in children with spinal impairments with computerized adaptive testing. <i>Journal of pediatric orthopedics</i> , 2008, 28, 3, 330-5. <a href="https://dx.doi.org/10.1097/BPO.0b013e318168c792">https://dx.doi.org/10.1097/BPO.0b013e318168c792</a> .                                                                                                                                                 |
| #820 | Vasiliadis 2008 | Vasiliadis, Elias; Grivas, Theodoros B. Quality of life after conservative treatment of adolescent idiopathic scoliosis. <i>Studies in health technology and informatics</i> , 2008, 135, ck1, 9214582, 409-13. .                                                                                                                                                                                                                                                                                                    |
| #832 | Upasani 2008    | Upasani, Vidyadhar V; Caltoun, Christine; Petcharaporn, Maty; Bastrom, Tracey P; Pawelek, Jeff B; Betz, Randal R; Clements, David H; Lenke, Lawrence G; Lowe, Thomas G; Newton, Peter O. Adolescent idiopathic scoliosis patients report increased pain at five years compared with two years after surgical treatment. <i>Spine</i> , 2008, 33, 10, 1107-12. <a href="https://dx.doi.org/10.1097/BRS.0b013e31816f2849">https://dx.doi.org/10.1097/BRS.0b013e31816f2849</a> .                                        |
| #862 | Baldus 2008     | Baldus, Christine; Bridwell, Keith H; Harrast, John; Edwards, Charles 2nd; Glassman, Steven; Horton, William; Lenke, Lawrence G; Lowe, Thomas; Mardjetko, Steve; Ondra, Stephen; Schwab, Frank; Shaffrey, Christopher. Age-gender matched comparison of SRS instrument scores between adult deformity and normal adults: are all SRS domains disease specific?. <i>Spine</i> , 2008, 33, 20, 114900. <a href="https://dx.doi.org/10.1097/BRS.0b013e31817c0466">https://dx.doi.org/10.1097/BRS.0b013e31817c0466</a> . |

|      |                  |                                                                                                                                                                                                                                                                                                                                                                                                                                                      |
|------|------------------|------------------------------------------------------------------------------------------------------------------------------------------------------------------------------------------------------------------------------------------------------------------------------------------------------------------------------------------------------------------------------------------------------------------------------------------------------|
| #871 | Hill 2008        | Hill, D; Parent, E; Lou, E; Mahood, J. Can future back pain in AIS subjects be predicted during adolescence from the severity of the deformity?. Studies in health technology and informatics, 2008, 140, ck1, 9214582, 249-53. .                                                                                                                                                                                                                    |
| #874 | Zeh 2008         | Zeh, Alexander; Planert, Michael; Klima, Stefan; Hein, Werner; Wohlrab, David. The flexible Triac-Brace for conservative treatment of idiopathic scoliosis. An alternative treatment option?. Acta orthopaedica Belgica, 2008, 74, 4, 512-21. .                                                                                                                                                                                                      |
| #878 | Newton 2008      | Newton, Peter O; Upasani, Vidyadhar V; Lhamby, Juliano; Ugrinow, Valerie L; Pawelek, Jeff B; Bastrom, Tracey P. Surgical treatment of main thoracic scoliosis with thoracoscopic anterior instrumentation. a five-year follow-up study. The Journal of bone and joint surgery. American volume, 2008, 90, 10, 2077-89. <a href="https://dx.doi.org/10.2106/JBJS.G.01315">https://dx.doi.org/10.2106/JBJS.G.01315</a> .                               |
| #883 | Smith 2008       | Smith, Justin S; Fu, Kai-Ming; Urban, Peter; Shaffrey, Christopher I. Neurological symptoms and deficits in adults with scoliosis who present to a surgical clinic: incidence and association with the choice of operative versus nonoperative management. Journal of neurosurgery. Spine, 2008, 9, 4, 326-31. <a href="https://dx.doi.org/10.3171/SPI.2008.9.10.326">https://dx.doi.org/10.3171/SPI.2008.9.10.326</a> .                             |
| #919 | Blondel 2012     | Blondel, Benjamin; Schwab, Frank; Ungar, Benjamin; Smith, Justin; Bridwell, Keith; Glassman, Steven; Shaffrey, Christopher; Farcy, Jean-Pierre; Lafage, Virginie. Impact of magnitude and percentage of global sagittal plane correction on health-related quality of life at 2-years follow-up. Neurosurgery, 2012, 71, 2, 341-348. <a href="https://dx.doi.org/10.1227/NEU.0b013e31825d20c0">https://dx.doi.org/10.1227/NEU.0b013e31825d20c0</a> . |
| #939 | Kinel 2012       | Kinel, Edyta; Kotwicki, Tomasz; Podolska, Anna; Bialek, Marianna; Stryla, Wanda. Quality of life and stress level in adolescents with idiopathic scoliosis subjected to conservative treatment. Studies in health technology and informatics, 2012, 176, ck1, 9214582, 419-22. .                                                                                                                                                                     |
| #941 | Tomaszewski 2012 | Tomaszewski, Ryszard; Janowska, Magdalena. Psychological aspects of scoliosis surgery in children. Studies in health technology and informatics, 2012, 176, ck1, 9214582, 428-32. .                                                                                                                                                                                                                                                                  |
| #948 | Diab 2012        | Diab, Aliaa A. The role of forward head correction in management of adolescent idiopathic scoliotic patients: a randomized controlled trial. Clinical rehabilitation, 2012, 26, 12, 1123-32. <a href="https://dx.doi.org/10.1177/0269215512447085">https://dx.doi.org/10.1177/0269215512447085</a> .                                                                                                                                                 |

|       |                  |                                                                                                                                                                                                                                                                                                                                                                                                                                                                                                                                                                                                                                                   |
|-------|------------------|---------------------------------------------------------------------------------------------------------------------------------------------------------------------------------------------------------------------------------------------------------------------------------------------------------------------------------------------------------------------------------------------------------------------------------------------------------------------------------------------------------------------------------------------------------------------------------------------------------------------------------------------------|
| #956  | Leszczewska 2012 | Leszczewska, Justyna; Czaprowski, Dariusz; Pawlowska, Paulina; Kolwicz, Aleksandra; Kotwicki, Tomasz. Evaluation of the stress level of children with idiopathic scoliosis in relation to the method of treatment and parameters of the deformity. TheScientificWorldJournal, 2012, 2012, 101131163, 538409. <a href="https://dx.doi.org/10.1100/2012/538409">https://dx.doi.org/10.1100/2012/538409</a> .                                                                                                                                                                                                                                        |
| #988  | Newton 2013      | Newton, Peter O; Marks, Michelle C; Bastrom, Tracey P; Betz, Randal; Clements, David; Lonner, Baron; Crawford, Alvin; Shufflebarger, Harry; O'Brien, Michael; Yaszay, Burt; Harms Study Group. Surgical treatment of Lenke 1 main thoracic idiopathic scoliosis: results of a prospective, multicenter study. Spine, 2013, 38, 4, 328-38. <a href="https://dx.doi.org/10.1097/BRS.0b013e31826c6df4">https://dx.doi.org/10.1097/BRS.0b013e31826c6df4</a> .                                                                                                                                                                                         |
| #990  | Bharucha 2013    | Bharucha, Neil J; Lonner, Baron S; Auerbach, Joshua D; Kean, Kristin E; Trobisch, Per D. Low-density versus high-density thoracic pedicle screw constructs in adolescent idiopathic scoliosis: do more screws lead to a better outcome?. The spine journal : official journal of the North American Spine Society, 2013, 13, 4, 375-81. <a href="https://dx.doi.org/10.1016/j.spinee.2012.05.029">https://dx.doi.org/10.1016/j.spinee.2012.05.029</a> .                                                                                                                                                                                           |
| #993  | Lerner 2013      | Lerner, Thomas; Liljenqvist, Ulf. Silicate-substituted calcium phosphate as a bone graft substitute in surgery for adolescent idiopathic scoliosis. European spine journal : official publication of the European Spine Society, the European Spinal Deformity Society, and the European Section of the Cervical Spine Research Society, 2013, 22 Suppl 2, 9301980, b9y, S185-94. <a href="https://dx.doi.org/10.1007/s00586-012-2485-7">https://dx.doi.org/10.1007/s00586-012-2485-7</a> .                                                                                                                                                       |
| #998  | Smith 2013       | Smith, Justin S; Shaffrey, Christopher I; Glassman, Steven D; Carreon, Leah Y; Schwab, Frank J; Lafage, Virginie; Arlet, Vincent; Fu, Kai-Ming G; Bridwell, Keith H; Spinal Deformity Study Group. Clinical and radiographic parameters that distinguish between the best and worst outcomes of scoliosis surgery for adults. European spine journal : official publication of the European Spine Society, the European Spinal Deformity Society, and the European Section of the Cervical Spine Research Society, 2013, 22, 2, 402-10. <a href="https://dx.doi.org/10.1007/s00586-012-2547-x">https://dx.doi.org/10.1007/s00586-012-2547-x</a> . |
| #1001 | Wang 2013        | Wang, Michael Y. Improvement of sagittal balance and lumbar lordosis following less invasive adult spinal deformity surgery with expandable cages and percutaneous instrumentation. Journal of neurosurgery. Spine, 2013, 18, 1, 44663. <a href="https://dx.doi.org/10.3171/2012.9.SPINE111081">https://dx.doi.org/10.3171/2012.9.SPINE111081</a> .                                                                                                                                                                                                                                                                                               |
| #1004 | Park 2013        | Park, Paul; La Marca, Frank. Combined "hybrid" open and minimally invasive surgical correction of adult thoracolumbar scoliosis: a retrospective cohort study. Neurosurgery, 2013, 72, 2, 151-9. <a href="https://dx.doi.org/10.1227/NEU.0b013e31827b9d55">https://dx.doi.org/10.1227/NEU.0b013e31827b9d55</a> .                                                                                                                                                                                                                                                                                                                                  |
| #1007 | Misterska 2013   | Misterska, Ewa; Glowacki, Maciej; Latuszewska, Joanna; Adamczyk, Katarzyna. Perception of stress level, trunk appearance, body function and mental health in females with adolescent idiopathic scoliosis treated conservatively: a longitudinal analysis. Quality of life research : an international journal of quality of life aspects of treatment, care and rehabilitation, 2013, 22, 7, 1633-45. <a href="https://dx.doi.org/10.1007/s11136-012-0316-2">https://dx.doi.org/10.1007/s11136-012-0316-2</a> .                                                                                                                                  |

|       |                  |                                                                                                                                                                                                                                                                                                                                                                                                                                                                                                                                                                                                                                                        |
|-------|------------------|--------------------------------------------------------------------------------------------------------------------------------------------------------------------------------------------------------------------------------------------------------------------------------------------------------------------------------------------------------------------------------------------------------------------------------------------------------------------------------------------------------------------------------------------------------------------------------------------------------------------------------------------------------|
| #1029 | Schwab 2013      | Schwab, Frank J; Blondel, Benjamin; Bess, Shay; Hostin, Richard; Shaffrey, Christopher I; Smith, Justin S; Boachie-Adjei, Oheneba; Burton, Douglas C; Akbarnia, Behrooz A; Mundis, Gregory M; Ames, Christopher P; Kebaish, Khaled; Hart, Robert A; Farcy, Jean-Pierre; Lafage, Virginie; International Spine Study Group (ISSG). Radiographical spinopelvic parameters and disability in the setting of adult spinal deformity: a prospective multicenter analysis. <i>Spine</i> , 2013, 38, 13, E803-12. <a href="https://dx.doi.org/10.1097/BRS.0b013e318292b7b9">https://dx.doi.org/10.1097/BRS.0b013e318292b7b9</a> .                             |
| #1034 | Smith 2013       | Smith, Justin S; Klineberg, Eric; Schwab, Frank; Shaffrey, Christopher I; Moal, Bertrand; Ames, Christopher P; Hostin, Richard; Fu, Kai-Ming G; Burton, Douglas; Akbarnia, Behrooz; Gupta, Munish; Hart, Robert; Bess, Shay; Lafage, Virginie; International Spine Study Group. Change in classification grade by the SRS-Schwab Adult Spinal Deformity Classification predicts impact on health-related quality of life measures: prospective analysis of operative and nonoperative treatment. <i>Spine</i> , 2013, 38, 19, 1663-71. <a href="https://dx.doi.org/10.1097/BRS.0b013e31829ec563">https://dx.doi.org/10.1097/BRS.0b013e31829ec563</a> . |
| #1036 | Zebracki 2013    | Zebracki, Kathy; Thawrani, Dinesh; Oswald, Timothy S; Anadio, Jennifer M; Sturm, Peter F; Spine Deformity Study Group. Predictors of emotional functioning in youth after surgical correction of idiopathic scoliosis. <i>Journal of pediatric orthopedics</i> , 2013, 33, 6, 624-7. <a href="https://dx.doi.org/10.1097/BPO.0b013e318288b77f">https://dx.doi.org/10.1097/BPO.0b013e318288b77f</a> .                                                                                                                                                                                                                                                   |
| #1046 | Danielsson 2013  | Danielsson, Aina J; Romberg, Karin. Reliability and validity of the Swedish version of the Scoliosis Research Society-22 (SRS-22r) patient questionnaire for idiopathic scoliosis. <i>Spine</i> , 2013, 38, 21, 1875-84. <a href="https://dx.doi.org/10.1097/BRS.0b013e3182a211c0">https://dx.doi.org/10.1097/BRS.0b013e3182a211c0</a> .                                                                                                                                                                                                                                                                                                               |
| #1050 | Phillips 2013    | Phillips, Frank M; Isaacs, Robert E; Rodgers, William Blake; Khajavi, Kaveh; Tohmeh, Antoine G; Deviren, Vedat; Peterson, Mark D; Hyde, Jonathan; Kurd, Mark. Adult degenerative scoliosis treated with XLIF: clinical and radiographical results of a prospective multicenter study with 24-month follow-up. <i>Spine</i> , 2013, 38, 21, 1853-61. <a href="https://dx.doi.org/10.1097/BRS.0b013e3182a43f0b">https://dx.doi.org/10.1097/BRS.0b013e3182a43f0b</a> .                                                                                                                                                                                    |
| #1052 | Bastrom 2013     | Bastrom, Tracey P; Marks, Michelle C; Yaszay, Burt; Newton, Peter O; Harms Study Group. Prevalence of postoperative pain in adolescent idiopathic scoliosis and the association with preoperative pain. <i>Spine</i> , 2013, 38, 21, 1848-52. <a href="https://dx.doi.org/10.1097/BRS.0b013e3182a4aa97">https://dx.doi.org/10.1097/BRS.0b013e3182a4aa97</a> .                                                                                                                                                                                                                                                                                          |
| #1053 | Deukmedjian 2013 | Deukmedjian, Armen R; Ahmadian, Amir; Bach, Konrad; Zouzias, Alexandros; Uribe, Juan S. Minimally invasive lateral approach for adult degenerative scoliosis: lessons learned. <i>Neurosurgical focus</i> , 2013, 35, 2, E4. <a href="https://dx.doi.org/10.3171/2013.5.FOCUS13173">https://dx.doi.org/10.3171/2013.5.FOCUS13173</a> .                                                                                                                                                                                                                                                                                                                 |
| #1067 | Weinstein 2013   | Weinstein, Stuart L; Dolan, Lori A; Wright, James G; Dobbs, Matthew B. Effects of bracing in adolescents with idiopathic scoliosis. <i>The New England journal of medicine</i> , 2013, 369, 16, 1512-21. <a href="https://dx.doi.org/10.1056/NEJMoa1307337">https://dx.doi.org/10.1056/NEJMoa1307337</a> .                                                                                                                                                                                                                                                                                                                                             |

|       |                  |                                                                                                                                                                                                                                                                                                                                                                                                                                                     |
|-------|------------------|-----------------------------------------------------------------------------------------------------------------------------------------------------------------------------------------------------------------------------------------------------------------------------------------------------------------------------------------------------------------------------------------------------------------------------------------------------|
| #1080 | Ersberg 2013     | Ersberg, Anna; Gerdhem, Paul. Pre- and postoperative quality of life in patients treated for scoliosis. Acta orthopaedica, 2013, 84, 6, 537-43. <a href="https://dx.doi.org/10.3109/17453674.2013.854667">https://dx.doi.org/10.3109/17453674.2013.854667</a> .                                                                                                                                                                                     |
| #1085 | Filippiadis 2013 | Filippiadis, Dimitrios K; Papagelopoulos, Panagiotis; Kitsou, Maria; Oikonomopoulos, Nikolaos; Brountzos, Elias; Kelekis, Nikolaos; Kelekis, Alexis. Percutaneous vertebroplasty in adult degenerative scoliosis for spine support: study for pain evaluation and mobility improvement. BioMed research international, 2013, 2013, 101600173, 626502. <a href="https://dx.doi.org/10.1155/2013/626502">https://dx.doi.org/10.1155/2013/626502</a> . |
| #1088 | Sieberg 2013     | Sieberg, Christine B; Simons, Laura E; Edelstein, Mark R; DeAngelis, Maria R; Pielech, Melissa; Sethna, Navil; Hresko, M Timothy. Pain prevalence and trajectories following pediatric spinal fusion surgery. The journal of pain : official journal of the American Pain Society, 2013, 14, 12, 1694-702. <a href="https://dx.doi.org/10.1016/j.jpain.2013.09.005">https://dx.doi.org/10.1016/j.jpain.2013.09.005</a> .                            |
| #1093 | Pellegrino 2014  | Pellegrino, Luciano N; Avanzi, Osmar. Prospective evaluation of quality of life in adolescent idiopathic scoliosis before and after surgery. Journal of spinal disorders & techniques, 2014, 27, 8, 409-14. <a href="https://dx.doi.org/10.1097/BSD.0b013e3182797a5e">https://dx.doi.org/10.1097/BSD.0b013e3182797a5e</a> .                                                                                                                         |
| #1101 | Garabekyan 2014  | Garabekyan, Tigran; Hosseinzadeh, Pooya; Iwinski, Henry J; Muchow, Ryan D; Talwalkar, Vishwas R; Walker, Janet; Milbrandt, Todd A. The results of preoperative halo-gravity traction in children with severe spinal deformity. Journal of pediatric orthopedics. Part B, 2014, 23, 1, 44566. <a href="https://dx.doi.org/10.1097/BPB.0b013e32836486b6">https://dx.doi.org/10.1097/BPB.0b013e32836486b6</a> .                                        |
| #1103 | Cheung 2007      | Cheung, Kenneth M C; Cheng, Elaine Y L; Chan, Samantha C W; Yeung, Kelvin W K; Luk, Keith D K. Outcome assessment of bracing in adolescent idiopathic scoliosis by the use of the SRS-22 questionnaire. International orthopaedics, 2007, 31, 4, 507-11. .                                                                                                                                                                                          |
| #1111 | Andersen 2010    | Andersen, Mikkel O; Thomsen, Karsten; Kyvik, Kirsten O. Perceived health status in self-reported adolescent idiopathic scoliosis: a survey based on a population of twins. Spine, 2010, 35, 16, 1571-4. <a href="https://dx.doi.org/10.1097/BRS.0b013e3181e47dab">https://dx.doi.org/10.1097/BRS.0b013e3181e47dab</a> .                                                                                                                             |
| #1119 | Sanders 2010     | Sanders, James O; Carreon, Leah Y; Sucato, Daniel J; Sturm, Peter F; Diab, Mohammad; Spinal Deformity Study Group. Preoperative and perioperative factors effect on adolescent idiopathic scoliosis surgical outcomes. Spine, 2010, 35, 20, 1867-71. <a href="https://dx.doi.org/10.1097/BRS.0b013e3181efa6f5">https://dx.doi.org/10.1097/BRS.0b013e3181efa6f5</a> .                                                                                |

|       |                  |                                                                                                                                                                                                                                                                                                                                                                                                                                                                                                                                    |
|-------|------------------|------------------------------------------------------------------------------------------------------------------------------------------------------------------------------------------------------------------------------------------------------------------------------------------------------------------------------------------------------------------------------------------------------------------------------------------------------------------------------------------------------------------------------------|
| #1120 | Bridwell 2010    | Bridwell, Keith H; Baldus, Christine; Berven, Sigurd; Edwards, Charles 2nd; Glassman, Steven; Hamill, Christopher; Horton, William; Lenke, Lawrence G; Ondra, Stephen; Schwab, Frank; Shaffrey, Christopher; Wootten, David. Changes in radiographic and clinical outcomes with primary treatment adult spinal deformity surgeries from two years to three- to five-years follow-up. Spine, 2010, 35, 20, 1849-54. <a href="https://dx.doi.org/10.1097/BRS.0b013e3181efa06a">https://dx.doi.org/10.1097/BRS.0b013e3181efa06a</a> . |
| #1121 | Zimmerman 2010   | Zimmerman, Ryan M; Mohamed, Ahmed S; Skolasky, Richard L; Robinson, Malaya D; Kebaish, Khaled M. Functional outcomes and complications after primary spinal surgery for scoliosis in adults aged forty years or older: a prospective study with minimum two-year follow-up. Spine, 2010, 35, 20, 1861-6. <a href="https://dx.doi.org/10.1097/BRS.0b013e3181e57827">https://dx.doi.org/10.1097/BRS.0b013e3181e57827</a> .                                                                                                           |
| #1122 | Crawford 2010    | Crawford, Charles H 3rd; Bridwell, Keith H; Cho, Woojin; Buchowski, Jacob M; O'Shaughnessy, Brian A; Chang, Michael S; Auerbach, Josh D. Extension of prior idiopathic scoliosis fusions to the sacrum: a matched cohort analysis of sixty patients with minimum two-year follow-up. Spine, 2010, 35, 20, 1843-8. <a href="https://dx.doi.org/10.1097/BRS.0b013e3181e03115">https://dx.doi.org/10.1097/BRS.0b013e3181e03115</a> .                                                                                                  |
| #1123 | Transfeldt 2010  | Transfeldt, Ensor E; Topp, Raymond; Mehbod, Amir A; Winter, Robert B. Surgical outcomes of decompression, decompression with limited fusion, and decompression with full curve fusion for degenerative scoliosis with radiculopathy. Spine, 2010, 35, 20, 1872-5. <a href="https://dx.doi.org/10.1097/BRS.0b013e3181ce63a2">https://dx.doi.org/10.1097/BRS.0b013e3181ce63a2</a> .                                                                                                                                                  |
| #1138 | Monticone 2010   | Monticone, Marco; Baiardi, Paola; Calabro, David; Calabro, Fabio; Foti, Calogero. Development of the Italian version of the revised Scoliosis Research Society-22 Patient Questionnaire, SRS-22r-I: cross-cultural adaptation, factor analysis, reliability, and validity. Spine, 2010, 35, 24, E1412-7. <a href="https://dx.doi.org/10.1097/BRS.0b013e3181e88981">https://dx.doi.org/10.1097/BRS.0b013e3181e88981</a> .                                                                                                           |
| #1153 | Misterska 2010   | Misterska, Ewa; Glowacki, Maciej; Harasymczuk, Jerzy. Personality characteristics of females with adolescent idiopathic scoliosis after brace or surgical treatment compared to healthy controls. Medical science monitor : international medical journal of experimental and clinical research, 2010, 16, 12, CR606-15. .                                                                                                                                                                                                         |
| #1164 | Roy-Beaudry 2011 | Roy-Beaudry, Marjolaine; Beausejour, Marie; Joncas, Julie; Forcier, Martin; Bekhiche, Sara; Labelle, Hubert; Grimard, Guy; Parent, Stefan. Validation and clinical relevance of a French-Canadian version of the spinal appearance questionnaire in adolescent patients. Spine, 2011, 36, 9, 746-51. <a href="https://dx.doi.org/10.1097/BRS.0b013e3181e040e7">https://dx.doi.org/10.1097/BRS.0b013e3181e040e7</a> .                                                                                                               |
| #1166 | Smith 2011       | Smith, Justin S; Shaffrey, Christopher I; Glassman, Steven D; Berven, Sigurd H; Schwab, Frank J; Hamill, Christopher L; Horton, William C; Ondra, Stephen L; Sansur, Charles A; Bridwell, Keith H; Spinal Deformity Study Group. Risk-benefit assessment of surgery for adult scoliosis: an analysis based on patient age. Spine, 2011, 36, 10, 817-24. <a href="https://dx.doi.org/10.1097/BRS.0b013e3181e21783">https://dx.doi.org/10.1097/BRS.0b013e3181e21783</a> .                                                            |

|       |              |                                                                                                                                                                                                                                                                                                                                                                                                                                                                                                                     |
|-------|--------------|---------------------------------------------------------------------------------------------------------------------------------------------------------------------------------------------------------------------------------------------------------------------------------------------------------------------------------------------------------------------------------------------------------------------------------------------------------------------------------------------------------------------|
| #1174 | Li 2011      | Li, Fangcai; Chen, Qixin; Chen, Weishan; Xu, Kan; Wu, Qionghua. Posterior-only approach with selective segmental TLIF for degenerative lumbar scoliosis. <i>Journal of spinal disorders &amp; techniques</i> , 2011, 24, 5, 308-12. <a href="https://dx.doi.org/10.1097/BSD.0b013e3181f9a7d5">https://dx.doi.org/10.1097/BSD.0b013e3181f9a7d5</a> .                                                                                                                                                                 |
| #1181 | Tsai 2011    | Tsai, Tai-Hsin; Huang, Tzuu-Yuan; Lieu, Ann-Shung; Lee, Kung-Shing; Kung, Sui-Sum; Chu, Cheng-Wei; Hwang, Shiuh-Lin. Functional outcome analysis: instrumented posterior lumbar interbody fusion for degenerative lumbar scoliosis. <i>Acta neurochirurgica</i> , 2011, 153, 3, 547-55. <a href="https://dx.doi.org/10.1007/s00701-010-0909-x">https://dx.doi.org/10.1007/s00701-010-0909-x</a> .                                                                                                                   |
| #1194 | Zhang 2011   | Zhang, Jingtao; He, Dawei; Gao, Juan; Yu, Xiuchun; Sun, Haining; Chen, Ziqiang; Li, Ming. Changes in life satisfaction and self-esteem in patients with adolescent idiopathic scoliosis with and without surgical intervention. <i>Spine</i> , 2011, 36, 9, 741-5. <a href="https://dx.doi.org/10.1097/BRS.0b013e3181e0f034">https://dx.doi.org/10.1097/BRS.0b013e3181e0f034</a> .                                                                                                                                  |
| #1197 | Carreon 2011 | Carreon, Leah Yacat; Sanders, James O; Diab, Mohammad; Sturm, Peter F; Sucato, Daniel J; Spinal Deformity Study Group. Patient satisfaction after surgical correction of adolescent idiopathic scoliosis. <i>Spine</i> , 2011, 36, 12, 965-8. <a href="https://dx.doi.org/10.1097/BRS.0b013e3181e92b1d">https://dx.doi.org/10.1097/BRS.0b013e3181e92b1d</a> .                                                                                                                                                       |
| #1201 | Smucny 2011  | Smucny, Mia; Lubicky, John P; Sanders, James O; Carreon, Leah Y; Diab, Mohammad. Patient self-assessment of appearance is improved more by all pedicle screw than by hybrid constructs in surgical treatment of adolescent idiopathic scoliosis. <i>Spine</i> , 2011, 36, 3, 248-54. <a href="https://dx.doi.org/10.1097/BRS.0b013e3181cdb4be">https://dx.doi.org/10.1097/BRS.0b013e3181cdb4be</a> .                                                                                                                |
| #1218 | Hong 2011    | Hong, Jae-Young; Suh, Seung-Woo; Easwar, T R; Modi, Hitesh N; Yang, Jae-Hyuk; Park, Jung-Ho. Evaluation of the three-dimensional deformities in scoliosis surgery with computed tomography: efficacy and relationship with clinical outcomes. <i>Spine</i> , 2011, 36, 19, E1259-65. <a href="https://dx.doi.org/10.1097/BRS.0b013e318205e413">https://dx.doi.org/10.1097/BRS.0b013e318205e413</a> .                                                                                                                |
| #1221 | Carreon 2011 | Carreon, Leah Y; Sanders, James O; Polly, David W; Sucato, Daniel J; Parent, Stefan; Roy-Beaudry, Marjolaine; Hopkins, Jeffrey; McClung, Anna; Bratcher, Kelly R; Diamond, Beverly E; Spinal Deformity Study Group. Spinal appearance questionnaire: factor analysis, scoring, reliability, and validity testing. <i>Spine</i> , 2011, 36, 18, E1240-4. <a href="https://dx.doi.org/10.1097/BRS.0b013e318204f987">https://dx.doi.org/10.1097/BRS.0b013e318204f987</a> .                                             |
| #1235 | Urrutia 2011 | Urrutia, Julio; Espinosa, Julio; Diaz-Ledezma, Claudio; Cabello, Carlos. The impact of lumbar scoliosis on pain, function and health-related quality of life in postmenopausal women. <i>European spine journal : official publication of the European Spine Society, the European Spinal Deformity Society, and the European Section of the Cervical Spine Research Society</i> , 2011, 20, 12, 1181-56. <a href="https://dx.doi.org/10.1007/s00586-011-1829-z">https://dx.doi.org/10.1007/s00586-011-1829-z</a> . |

|       |                |                                                                                                                                                                                                                                                                                                                                                                                                                                                                                                                                                                                                                                      |
|-------|----------------|--------------------------------------------------------------------------------------------------------------------------------------------------------------------------------------------------------------------------------------------------------------------------------------------------------------------------------------------------------------------------------------------------------------------------------------------------------------------------------------------------------------------------------------------------------------------------------------------------------------------------------------|
| #1243 | Fu 2011        | Fu, Kai-Ming G; Rhagavan, Prashant; Shaffrey, Christopher I; Chernavvsky, Daniel R; Smith, Justin S. Prevalence, severity, and impact of foraminal and canal stenosis among adults with degenerative scoliosis. <i>Neurosurgery</i> , 2011, 69, 6, 1181-7. <a href="https://dx.doi.org/10.1227/NEU.0b013e31822a9aeb">https://dx.doi.org/10.1227/NEU.0b013e31822a9aeb</a> .                                                                                                                                                                                                                                                           |
| #1256 | Lonjon 2014    | Lonjon, Guillaume; Ilharreborde, Brice; Odent, Thierry; Moreau, Sebastien; Glorion, Christophe; Mazda, Keyvan. Reliability and validity of the French-Canadian version of the scoliosis research society 22 questionnaire in France. <i>Spine</i> , 2014, 39, 1, E26-34. <a href="https://dx.doi.org/10.1097/BRS.0000000000000080">https://dx.doi.org/10.1097/BRS.0000000000000080</a> .                                                                                                                                                                                                                                             |
| #1270 | Brox 2014      | Brox, J I; Lange, J E; Steen, H. Comorbidity influenced health-related quality of life of 390 patients with idiopathic scoliosis at long-term follow-up. <i>European journal of physical and rehabilitation medicine</i> , 2014, 50, 1, 73-81. .                                                                                                                                                                                                                                                                                                                                                                                     |
| #1278 | Schlosser 2014 | Schlosser, Tom P C; Stadhouders, Agnita; Schimmel, Janneke J P; Lehr, A Mechteld; van der Heijden, Geert J M G; Castelein, Rene M. Reliability and validity of the adapted Dutch version of the revised Scoliosis Research Society 22-item questionnaire. <i>The spine journal : official journal of the North American Spine Society</i> , 2014, 24, 8, 1663-72. <a href="https://dx.doi.org/10.1016/j.spinee.2013.09.046">https://dx.doi.org/10.1016/j.spinee.2013.09.046</a> .                                                                                                                                                    |
| #1280 | Noh 2014       | Noh, Dong Koog; You, Joshua Sung-H; Koh, Jae-Hyun; Kim, Hoseong; Kim, Donghyun; Ko, Sung-Mok; Shin, Ji-Youn. Effects of novel corrective spinal technique on adolescent idiopathic scoliosis as assessed by radiographic imaging. <i>Journal of back and musculoskeletal rehabilitation</i> , 2014, 27, 3, 331-8. <a href="https://dx.doi.org/10.3233/BMR-130452">https://dx.doi.org/10.3233/BMR-130452</a> .                                                                                                                                                                                                                        |
| #1282 | Scheer 2014    | Scheer, Justin K; Lafage, Virginie; Smith, Justin S; Deviren, Vedat; Hostin, Richard; McCarthy, Ian M; Mundis, Gregory M; Burton, Douglas C; Klineberg, Eric; Gupta, Munish C; Kebaish, Khaled M; Shaffrey, Christopher I; Bess, Shay; Schwab, Frank; Ames, Christopher P; International Spine Study Group. Impact of age on the likelihood of reaching a minimum clinically important difference in 374 three-column spinal osteotomies: clinical article. <i>Journal of neurosurgery. Spine</i> , 2014, 20, 3, 306-12. <a href="https://dx.doi.org/10.3171/2013.12.SPINE13680">https://dx.doi.org/10.3171/2013.12.SPINE13680</a> . |
| #1298 | Ding 2014      | Ding, Ran; Liang, Jinqian; Qiu, Guixing; Shen, Jianxiong; Li, Zheng. Evaluation of quality of life in adolescent idiopathic scoliosis with different distal fusion level: a comparison of L3 versus L4. <i>Journal of spinal disorders &amp; techniques</i> , 2014, 27, 5, E155-61. <a href="https://dx.doi.org/10.1097/BSD.0000000000000073">https://dx.doi.org/10.1097/BSD.0000000000000073</a> .                                                                                                                                                                                                                                  |
| #1299 | Caronni 2014   | Caronni, Antonio; Zaina, Fabio; Negrini, Stefano. Improving the measurement of health-related quality of life in adolescent with idiopathic scoliosis: the SRS-7, a Rasch-developed short form of the SRS-22 questionnaire. <i>Research in developmental disabilities</i> , 2014, 35, 4, 784-99. <a href="https://dx.doi.org/10.1016/j.ridd.2014.01.020">https://dx.doi.org/10.1016/j.ridd.2014.01.020</a> .                                                                                                                                                                                                                         |



|       |                |                                                                                                                                                                                                                                                                                                                                                                                                                                                                                                                                                                                                                                 |
|-------|----------------|---------------------------------------------------------------------------------------------------------------------------------------------------------------------------------------------------------------------------------------------------------------------------------------------------------------------------------------------------------------------------------------------------------------------------------------------------------------------------------------------------------------------------------------------------------------------------------------------------------------------------------|
| #1309 | Fu 2014        | Fu, Lingjie; Chang, Michael S; Crandall, Dennis G; Revella, Jan. Comparative analysis of clinical outcomes and complications in patients with degenerative scoliosis undergoing primary versus revision surgery. <i>Spine</i> , 2014, 39, 10, 805-11. <a href="https://dx.doi.org/10.1097/BRS.0000000000000283">https://dx.doi.org/10.1097/BRS.0000000000000283</a> .                                                                                                                                                                                                                                                           |
| #1312 | Verma 2014     | Verma, Kushagra; Lonner, Baron; Toombs, Courtney S; Ferrise, Paige; Wright, Bettye; King, Akilah B; Boachie-Adjei, Oheneba. International utilization of the SRS-22 instrument to assess outcomes in adolescent idiopathic scoliosis: what can we learn from a medical outreach group in Ghana?. <i>Journal of pediatric orthopedics</i> , 2014, 34, 5, 503-8. <a href="https://dx.doi.org/10.1097/BPO.0000000000000137">https://dx.doi.org/10.1097/BPO.0000000000000137</a> .                                                                                                                                                  |
| #1314 | Khajavi 2014   | Khajavi, Kaveh; Shen, Alessandria Y. Two-year radiographic and clinical outcomes of a minimally invasive, lateral, transpoas approach for anterior lumbar interbody fusion in the treatment of adult degenerative scoliosis. <i>European spine journal : official publication of the European Spine Society, the European Spinal Deformity Society, and the European Section of the Cervical Spine Research Society</i> , 2014, 23, 6, 1215-23. <a href="https://dx.doi.org/10.1007/s00586-014-3246-6">https://dx.doi.org/10.1007/s00586-014-3246-6</a> .                                                                       |
| #1319 | Monticone 2014 | Monticone, Marco; Ambrosini, Emilia; Cazzaniga, Daniele; Rocca, Barbara; Ferrante, Simona. Active self-correction and task-oriented exercises reduce spinal deformity and improve quality of life in subjects with mild adolescent idiopathic scoliosis. Results of a randomised controlled trial. <i>European spine journal : official publication of the European Spine Society, the European Spinal Deformity Society, and the European Section of the Cervical Spine Research Society</i> , 2014, 23, 6, 1204-14. <a href="https://dx.doi.org/10.1007/s00586-014-3241-y">https://dx.doi.org/10.1007/s00586-014-3241-y</a> . |
| #1321 | Hoashi 2014    | Hoashi, Jane S; Samdani, Amer F; Betz, Randal R; Bastrom, Tracey P; Harms Study Group; Cahill, Patrick J. Is there a "July effect" in surgery for adolescent idiopathic scoliosis?. <i>The Journal of bone and joint surgery. American volume</i> , 2014, 96, 7, e55. <a href="https://dx.doi.org/10.2106/JBJS.M.00150">https://dx.doi.org/10.2106/JBJS.M.00150</a> .                                                                                                                                                                                                                                                           |
| #1324 | Mesfin 2014    | Mesfin, Addisu; Lenke, Lawrence G; Bridwell, Keith H; Akhtar, Usman; Jupitz, Jennifer M; Fogelson, Jeremy L; Hershman, Stuart H; Kim, Han J; Koester, Linda A. Does preoperative narcotic use adversely affect outcomes and complications after spinal deformity surgery? A comparison of nonnarcotic- with narcotic-using groups. <i>The spine journal : official journal of the North American Spine Society</i> , 2014, 24, 12, 2819-25. <a href="https://dx.doi.org/10.1016/j.spinee.2014.03.049">https://dx.doi.org/10.1016/j.spinee.2014.03.049</a> .                                                                     |
| #1334 | Auerbach 2014  | Auerbach, Joshua D; Lonner, Baron S; Crerand, Canice E; Shah, Suken A; Flynn, John M; Bastrom, Tracey; Penn, Phedra; Ahn, Jennifer; Toombs, Courtney; Bharucha, Neil; Bowe, Whitney P; Newton, Peter O. Body image in patients with adolescent idiopathic scoliosis: validation of the Body Image Disturbance Questionnaire--Scoliosis Version. <i>The Journal of bone and joint surgery. American volume</i> , 2014, 96, 8, e61. <a href="https://dx.doi.org/10.2106/JBJS.L.00867">https://dx.doi.org/10.2106/JBJS.L.00867</a> .                                                                                               |
| #1337 | Tempel 2014    | Tempel, Zachary J; Gandhoke, Gurpreet S; Bonfield, Christopher M; Okonkwo, David O; Kanter, Adam S. Radiographic and clinical outcomes following combined lateral lumbar interbody fusion and posterior segmental stabilization in patients with adult degenerative scoliosis. <i>Neurosurgical focus</i> , 2014, 36, 5, E11. <a href="https://dx.doi.org/10.3171/2014.3.FOCUS13368">https://dx.doi.org/10.3171/2014.3.FOCUS13368</a> .                                                                                                                                                                                         |

|       |                     |                                                                                                                                                                                                                                                                                                                                                                                                                                                                                                                                                                                                                                                                                                                                                                                                                                                                                                                                                                                                                                                                                                                                                                                                                                                                                                                                                                                                                                                        |
|-------|---------------------|--------------------------------------------------------------------------------------------------------------------------------------------------------------------------------------------------------------------------------------------------------------------------------------------------------------------------------------------------------------------------------------------------------------------------------------------------------------------------------------------------------------------------------------------------------------------------------------------------------------------------------------------------------------------------------------------------------------------------------------------------------------------------------------------------------------------------------------------------------------------------------------------------------------------------------------------------------------------------------------------------------------------------------------------------------------------------------------------------------------------------------------------------------------------------------------------------------------------------------------------------------------------------------------------------------------------------------------------------------------------------------------------------------------------------------------------------------|
| #1338 | Haque 2014          | <p>Haque, Raqeeb M; Mundis, Gregory M Jr; Ahmed, Youser; El Anmadien, Tarek Y; Wang, Michael Y; Mummaneni, Praveen V; Uribe, Juan S; Okonkwo, David O; Eastlack, Robert K; Anand, Neel; Kanter, Adam S; La Marca, Frank; Akbarnia, Behrooz A; Park, Paul; Lafage, Virginie; Terran, Jamie S; Shaffrey, Christopher I; Klineberg, Eric; Deviren, Vedat; Fessler, Richard G; International Spine Study Group. Comparison of radiographic results after minimally invasive, hybrid, and open surgery for adult spinal deformity: a multicenter study of 184 patients. <i>Neurosurgical focus</i>, 2014, 36, 5, E13. <a href="https://dx.doi.org/10.3171/2014.3.FOCUS1424">https://dx.doi.org/10.3171/2014.3.FOCUS1424</a>.</p> <p>Fu, Kai-Ming G; Bess, Snay; Snartrey, Christopher I; Smith, Justin S; Lafage, Virginie; Schwab, Frank; Burton, Douglas C; Akbarnia, Behrooz A; Ames, Christopher P; Boachie-Adjei, Oheneba; Deverin, Vedat; Hart, Robert A; Hostin, Richard; Klineberg, Eric; Gupta, Munish; Kebaish, Khaled; Mundis, Gregory; Mummaneni, Praveen V; International Spine Study Group. Patients with adult spinal deformity treated operatively report greater baseline pain and disability than patients treated nonoperatively; however, deformities differ between age groups. <i>Spine</i>, 2014, 39, 17, 1401-7. <a href="https://dx.doi.org/10.1097/BRS.0000000000000414">https://dx.doi.org/10.1097/BRS.0000000000000414</a>.</p> |
| #1349 | Fu 2014             |                                                                                                                                                                                                                                                                                                                                                                                                                                                                                                                                                                                                                                                                                                                                                                                                                                                                                                                                                                                                                                                                                                                                                                                                                                                                                                                                                                                                                                                        |
| #1350 | Urquhart 2014       | <p>Urquhart, D S; Gallella, S; Gidaris, D; Brady, E; Blacklock, S; Tsirikos, A I. Six-year follow-up study on the effect of combined anterior and posterior spinal fusion on lung function and quality of life in young people with adolescent idiopathic scoliosis. <i>Archives of disease in childhood</i>, 2014, 99, 10, 922-6. <a href="https://dx.doi.org/10.1136/archdischild-2013-305739">https://dx.doi.org/10.1136/archdischild-2013-305739</a>.</p>                                                                                                                                                                                                                                                                                                                                                                                                                                                                                                                                                                                                                                                                                                                                                                                                                                                                                                                                                                                          |
| #1361 | dosSantosAlves 2014 | <p>dos Santos Alves, Vera Lucia; Alves da Silva, Renato Jose Azevedo Leite; Avanzi, Osmar. Effect of a preoperative protocol of aerobic physical therapy on the quality of life of patients with adolescent idiopathic scoliosis: a randomized clinical study. <i>American journal of orthopedics (Belle Mead, N.J.)</i>, 2014, 43, 6, E112-6. .</p>                                                                                                                                                                                                                                                                                                                                                                                                                                                                                                                                                                                                                                                                                                                                                                                                                                                                                                                                                                                                                                                                                                   |
| #1376 | Hines 2015          | <p>Hines, Tabatha; Roland, Sandy; Nguyen, Dylan; Kennard, Beth; Richard, Heather; Hughes, Carroll W; McClintock, Shawn M; Ramo, Brandon; Herring, Tony. School Scoliosis Screenings: Family Experiences and Potential Anxiety After Orthopaedic Referral. <i>Spine</i>, 2015, 40, 21, E1135-43. <a href="https://dx.doi.org/10.1097/BRS.0000000000001040">https://dx.doi.org/10.1097/BRS.0000000000001040</a>.</p>                                                                                                                                                                                                                                                                                                                                                                                                                                                                                                                                                                                                                                                                                                                                                                                                                                                                                                                                                                                                                                     |
| #1384 | Bastrom 2015        | <p>Bastrom, Tracey P; Bartley, Carrie; Marks, Michelle C; Yaszay, Burt; Newton, Peter O; Harms Study Group. Postoperative Perfection: Ceiling Effects and Lack of Discrimination With Both SRS-22 and -24 Outcomes Instruments in Patients With Adolescent Idiopathic Scoliosis. <i>Spine</i>, 2015, 40, 24, E1323-9. <a href="https://dx.doi.org/10.1097/BRS.0000000000001082">https://dx.doi.org/10.1097/BRS.0000000000001082</a>.</p>                                                                                                                                                                                                                                                                                                                                                                                                                                                                                                                                                                                                                                                                                                                                                                                                                                                                                                                                                                                                               |
| #1386 | Xu 2015             | <p>Xu, Ximing; Wang, Fei; Yang, Mingyuan; Huang, Qikai; Chang, Yifan; Wei, Xianzhao; Bai, Yushu; Li, Ming. Chinese Adaptation of the Bad Sobernheim Stress Questionnaire for Patients With Adolescent Idiopathic Scoliosis Under Brace Treatment. <i>Medicine</i>, 2015, 94, 31, e1236. <a href="https://dx.doi.org/10.1097/MD.0000000000001236">https://dx.doi.org/10.1097/MD.0000000000001236</a>.</p>                                                                                                                                                                                                                                                                                                                                                                                                                                                                                                                                                                                                                                                                                                                                                                                                                                                                                                                                                                                                                                               |
| #1392 | Durmala 2015        | <p>Durmala, Jacek; Blicharska, Irmina; Drosdzol-Cop, Agnieszka; Skrzypulec-Plinta, Violetta. The Level of Self-Esteem and Sexual Functioning in Women with Idiopathic Scoliosis: A Preliminary Study. <i>International journal of environmental research and public health</i>, 2015, 12, 8, 9444-53. <a href="https://dx.doi.org/10.3390/ijerph120809444">https://dx.doi.org/10.3390/ijerph120809444</a>.</p>                                                                                                                                                                                                                                                                                                                                                                                                                                                                                                                                                                                                                                                                                                                                                                                                                                                                                                                                                                                                                                         |

- #1397 Uddin 2015 Uddin, Omar M; Haque, Raqeeb; Sugrue, Patrick A; Ahmed, Yousef M; El Ahmadieh, Tarek Y; Press, Joel M; Koski, Tyler; Fessler, Richard G. Cost minimization in treatment of adult degenerative scoliosis. Journal of neurosurgery. Spine, 2015, 23, 6, 798-806.  
<https://dx.doi.org/10.3171/2015.3.SPINE14560>.
- #1408 Zapata 2015 Zapata, Karina Amani; Wang-Price, Sharon S; Sucato, Daniel J; Thompson, Mary; Trudelle-Jackson, Elaine; Lovelace-Chandler, Venita. Spinal Stabilization Exercise Effectiveness for Low Back Pain in Adolescent Idiopathic Scoliosis: A Randomized Trial. Pediatric physical therapy : the official publication of the Section on Pediatrics of the American Physical Therapy Association, 2015, 27, 4, 396-402.  
<https://dx.doi.org/10.1097/PEP.0000000000000174>.
- #1422 Bao 2015 Bao, Hongda; Yan, Peng; Lonner, Baron; Qiu, Yong; Ren, Yuan; Zhu, Zezhong; Liu, Zhen; Zhu, Feng. Validation of the Simplified Chinese Version of the Body Image Disturbance Questionnaire-Scoliosis. Spine, 2015, 40, 21, E1155-60.  
<https://dx.doi.org/10.1097/BRS.0000000000001140>.
- #1426 Anwer 2015 Anwer, Shah Nawaz; Alghadir, Ahmad; Abu Shaphe, Md; Anwar, Dilshad. Effects of Exercise on Spinal Deformities and Quality of Life in Patients with Adolescent Idiopathic Scoliosis. BioMed research international, 2015, 2015, 101600173, 123848.  
<https://dx.doi.org/10.1155/2015/123848>.
- #1435 Daniels 2015 Daniels, Alan H; Smith, Justin S; Hiratzka, Jayme; Ames, Christopher P; Bess, Shay; Shaffrey, Christopher I; Schwab, Frank J; Lafage, Virginie; Klineberg, Eric O; Burton, Doug; Mundis, Greg M; Line, Breton; Hart, Robert A; International Spine Study Group (ISSG). Functional Limitations Due to Lumbar Stiffness in Adults With and Without Spinal Deformity. Spine, 2015, 40, 20, 1599-604.  
<https://dx.doi.org/10.1097/BRS.0000000000001090>.
- #1445 Kleinstueck 2016 Kleinstueck, F S; Fekete, T F; Jeszenszky, D; Haschtmann, D; Mannion, A F. Adult degenerative scoliosis: comparison of patient-rated outcome after three different surgical treatments. European spine journal : official publication of the European Spine Society, the European Spinal Deformity Society, and the European Section of the Cervical Spine Research Society, 2016, 25, 8, 2649-56.  
<https://dx.doi.org/10.1007/s00586-014-3484-7>.
- #1447 Sciubba 2016 Sciubba, Daniel M; Scheer, Justin K; Yurter, Alp; Smith, Justin S; Lafage, Virginie; Klineberg, Eric; Gupta, Munish; Eastlack, Robert; Mundis, Gregory M; Protopsaltis, Themistocles S; Blaskiewicz, Donald; Kim, Han Jo; Koski, Tyler; Kebaish, Khaled; Shaffrey, Christopher I; Bess, Shay; Hart, Robert A; Schwab, Frank; Ames, Christopher P; International Spine Study Group (ISSG). Patients with spinal deformity over the age of 75: a retrospective analysis of operative versus non-operative management. European spine journal : official publication of the European Spine Society, the European Spinal Deformity Society, and the European Section of the Cervical Spine Research Society, 2016,
- #1450 Kuru 2016 Kuru, Tugba; Yeldan, Ipek; Dereli, E Elcin; Ozdincler, Arzu R; Dikici, Fatih; Colak, Ilker. The efficacy of three-dimensional Schroth exercises in adolescent idiopathic scoliosis: a randomised controlled clinical trial. Clinical rehabilitation, 2016, 30, 2, 181-90.  
<https://dx.doi.org/10.1177/0269215515575745>.

|       |                |                                                                                                                                                                                                                                                                                                                                                                                                                                                                                                                                                                                                                                                                                                                                                                                                                                                                                                                                                                                                                             |
|-------|----------------|-----------------------------------------------------------------------------------------------------------------------------------------------------------------------------------------------------------------------------------------------------------------------------------------------------------------------------------------------------------------------------------------------------------------------------------------------------------------------------------------------------------------------------------------------------------------------------------------------------------------------------------------------------------------------------------------------------------------------------------------------------------------------------------------------------------------------------------------------------------------------------------------------------------------------------------------------------------------------------------------------------------------------------|
| #1454 | Matamalas 2016 | Matamalas, Antonia; Bago, Juan; D'Agata, Elisabetta; Pellise, Ferran. Does patient perception of shoulder balance correlate with clinical balance?. European spine journal : official publication of the European Spine Society, the European Spinal Deformity Society, and the European Section of the Cervical Spine Research Society, 2016, 25, 11, 3560-3567. .<br>Ferrero, Emmanuelle; Vira, Snaeen; Ames, Christopher P; Kepaisn, Knaed; Ubeid, Ibrahim; O'Brien, Michael F; Gupta, Munish C; Boacnie-Adjei, Oheneba; Smith, Justin S; Mundis, Gregory M; Challier, Vincent; Protosaltis, Themistocles S; Schwab, Frank J; Lafage, Virginie; International Spine Study Group. Analysis of an unexplored group of sagittal deformity patients: low pelvic tilt despite positive sagittal malalignment. European spine journal : official publication of the European Spine Society, the European Spinal Deformity Society, and the European Section of the Cervical Spine Research Society, 2016, 25, 11, 3568-3576. . |
| #1460 | Ferrero 2016   |                                                                                                                                                                                                                                                                                                                                                                                                                                                                                                                                                                                                                                                                                                                                                                                                                                                                                                                                                                                                                             |
| #1464 | Berliner 2013  | Berliner, Jonathan L; Verma, Kushagra; Lonner, Baron S; Penn, Phedra U; Bharucha, Neil J. Discriminative validity of the Scoliosis Research Society 22 questionnaire among five curve-severity subgroups of adolescents with idiopathic scoliosis. The spine journal : official journal of the North American Spine Society, 2013, 13, 2, 127-33. <a href="https://dx.doi.org/10.1016/j.spinee.2012.10.025">https://dx.doi.org/10.1016/j.spinee.2012.10.025</a> .                                                                                                                                                                                                                                                                                                                                                                                                                                                                                                                                                           |
| #1484 | Kim 2013       | Kim, Han Jo; Buchowski, Jacob M; Zebala, Lukas P; Dickson, Douglas D; Koester, Linda; Bridwell, Keith H. RhBMP-2 is superior to iliac crest bone graft for long fusions to the sacrum in adult spinal deformity: 4- to 14-year follow-up. Spine, 2013, 38, 14, 1209-15. <a href="https://dx.doi.org/10.1097/BRS.0b013e31828b656d">https://dx.doi.org/10.1097/BRS.0b013e31828b656d</a> .                                                                                                                                                                                                                                                                                                                                                                                                                                                                                                                                                                                                                                     |
| #1490 | Lansford 2013  | Lansford, Todd J; Burton, Douglas C; Asher, Marc A; Lai, Sue-Min. Radiographic and patient-based outcome analysis of different bone-grafting techniques in the surgical treatment of idiopathic scoliosis with a minimum 4-year follow-up: allograft versus autograft/allograft combination. The spine journal : official journal of the North American Spine Society, 2013, 13, 5, 523-9. <a href="https://dx.doi.org/10.1016/j.spinee.2013.01.025">https://dx.doi.org/10.1016/j.spinee.2013.01.025</a> .                                                                                                                                                                                                                                                                                                                                                                                                                                                                                                                  |
| #1493 | Daubs 2013     | Daubs, Michael D; Lenke, Lawrence G; Bridwell, Keith H; Kim, Yongjung J; Hung, Man; Cheh, Gene; Koester, Linda A. Does correction of preoperative coronal imbalance make a difference in outcomes of adult patients with deformity?. Spine, 2013, 38, 6, 476-83. <a href="https://dx.doi.org/10.1097/BRS.0b013e3182846eb3">https://dx.doi.org/10.1097/BRS.0b013e3182846eb3</a> .                                                                                                                                                                                                                                                                                                                                                                                                                                                                                                                                                                                                                                            |
| #1499 | He 2016        | He, Shouyu; Bao, Hongda; Zhu, Zezhang; Qiu, Yong; Zhu, Feng; Zhou, Hengcai; Sun, Xu; Wang, Bin. Vertebral coplanar alignment technique: a surgical option for correction of adult thoracic idiopathic scoliosis. European spine journal : official publication of the European Spine Society, the European Spinal Deformity Society, and the European Section of the Cervical Spine Research Society, 2016, 25, 2, 417-23. <a href="https://dx.doi.org/10.1007/s00586-015-4080-1">https://dx.doi.org/10.1007/s00586-015-4080-1</a> .                                                                                                                                                                                                                                                                                                                                                                                                                                                                                        |
| #1507 | Ketenci 2016   | Ketenci, Ismail Emre; Yanik, Hakan Serhat; Demiroz, Serdar; Ulusoy, Ayhan; Erdem, Sevki. Three-Dimensional Correction in Patients With Lenke 1 Adolescent Idiopathic Scoliosis: Comparison of Consecutive Versus Interval Pedicle Screw Instrumentation. Spine, 2016, 41, 2, 134-8. <a href="https://dx.doi.org/10.1097/BRS.0000000000001182">https://dx.doi.org/10.1097/BRS.0000000000001182</a> .                                                                                                                                                                                                                                                                                                                                                                                                                                                                                                                                                                                                                         |

|       |                |                                                                                                                                                                                                                                                                                                                                                                                                                                                                                                                                                                                                                                                                                                                                             |
|-------|----------------|---------------------------------------------------------------------------------------------------------------------------------------------------------------------------------------------------------------------------------------------------------------------------------------------------------------------------------------------------------------------------------------------------------------------------------------------------------------------------------------------------------------------------------------------------------------------------------------------------------------------------------------------------------------------------------------------------------------------------------------------|
| #1509 | Mummaneni 2016 | Mummaneni, Praveen V; Park, Paul; Fu, Kai-Ming; Wang, Michael Y; Nguyen, Stacie; Lafage, Virginie; Uribe, Juan S; Ziewacz, John; Terran, Jamie; Okonkwo, David O; Anand, Neel; Fessler, Richard; Kanter, Adam S; LaMarca, Frank; Deviren, Vedat; Bess, R Shay; Schwab, Frank J; Smith, Justin S; Akbarnia, Behrooz A; Mundis, Gregory M Jr; Shaffrey, Christopher I; International Spine Study Group. Does Minimally Invasive Percutaneous Posterior Instrumentation Reduce Risk of Proximal Junctional Kyphosis in Adult Spinal Deformity Surgery? A Propensity-Matched Cohort Analysis. Neurosurgery, 2016, 78, 1, 101-8. <a href="https://dx.doi.org/10.1227/NEU.0000000000001002">https://dx.doi.org/10.1227/NEU.0000000000001002</a> . |
| #1517 | Park 2016      | Park, Paul; Okonkwo, David O; Nguyen, Stacie; Mundis, Gregory M Jr; Inan, Knoi D; Deviren, Vedat; LaMarca, Frank; Fu, Kai-Ming; Wang, Michael Y; Uribe, Juan S; Anand, Neel; Fessler, Richard; Nunley, Pierce D; Chou, Dean; Kanter, Adam S; Shaffrey, Christopher I; Akbarnia, Behrooz A; Passias, Peter G; Eastlack, Robert K; Mummaneni, Praveen V; International Spine Study Group. Can a Minimal Clinically Important Difference Be Achieved in Elderly Patients with Adult Spinal Deformity Who Undergo Minimally Invasive Spinal Surgery?. World neurosurgery, 2016, 86, 101528275, 168-72. <a href="https://dx.doi.org/10.1016/j.wneu.2015.09.072">https://dx.doi.org/10.1016/j.wneu.2015.09.072</a> .                              |
| #1520 | Mannion 2016   | Mannion, A F; Villa-Casademunt, A; Domingo-Sabat, M; Wunderlin, S; Pellise, F; Bago, J; Acaroglu, E; Alanay, A; Perez-Grueso, F S; Uebel, I; Kleinstuck, F S; European Spine Study Group (ESSG). The Core Outcome Measures Index (COMI) is a responsive instrument for assessing the outcome of treatment for adult spinal deformity. European spine journal : official publication of the European Spine Society, the European Spinal Deformity Society, and the European Section of the Cervical Spine Research Society, 2016, 25, 8, 2638-48. <a href="https://dx.doi.org/10.1007/s00586-015-4292-4">https://dx.doi.org/10.1007/s00586-015-4292-4</a> .                                                                                  |
| #1522 | Liu 2016       | Liu, Shian; Diebo, Basse G; Henry, Jensen K; Smith, Justin S; Hostin, Richard; Cunningham, Matthew E; Mundis, Gregory; Ames, Christopher P; Burton, Douglas; Bess, Shay; Akbarnia, Behrooz; Hart, Robert; Passias, Peter G; Schwab, Frank J; Lafage, Virginie; International Spine Study Group (ISSG). The benefit of nonoperative treatment for adult spinal deformity: identifying predictors for reaching a minimal clinically important difference. The spine journal : official journal of the North American Spine Society, 2016, 26, 2, 210-8. <a href="https://dx.doi.org/10.1016/j.spinee.2015.10.043">https://dx.doi.org/10.1016/j.spinee.2015.10.043</a> .                                                                       |
| #1523 | Schwieger 2016 | Schwieger, Traci; Campo, Shelly; Weinstein, Stuart L; Dolan, Lori A; Ashida, Sato; Steuber, Keli R. Body Image and Quality-of-Life in Untreated Versus Brace-Treated Females With Adolescent Idiopathic Scoliosis. Spine, 2016, 41, 4, 311-9. <a href="https://dx.doi.org/10.1097/BRS.0000000000001210">https://dx.doi.org/10.1097/BRS.0000000000001210</a> .                                                                                                                                                                                                                                                                                                                                                                               |
| #1527 | Bess 2016      | Bess, Shay; Line, Breton; Fu, Kai-Ming; McCarthy, Ian; Lafage, Virginie; Schwab, Frank; Shaffrey, Christopher; Ames, Christopher; Akbarnia, Behrooz; Jo, Han; Kelly, Michael; Burton, Douglas; Hart, Robert; Klineberg, Eric; Kebaish, Khaled; Hostin, Richard; Mundis, Gregory; Mummaneni, Praveen; Smith, Justin S; International Spine Study Group. The Health Impact of Symptomatic Adult Spinal Deformity: Comparison of Deformity Types to United States Population Norms and Chronic Diseases. Spine, 2016, 41, 3, 224-33. <a href="https://dx.doi.org/10.1097/BRS.0000000000001202">https://dx.doi.org/10.1097/BRS.0000000000001202</a> .                                                                                           |
| #1528 | Ha 2016        | Ha, Kee-Yong; Jang, Won-Hee; Kim, Young-Hoon; Park, Dong-Chul. Clinical Relevance of the SRS-Schwab Classification for Degenerative Lumbar Scoliosis. Spine, 2016, 41, 5, E282-8. <a href="https://dx.doi.org/10.1097/BRS.0000000000001229">https://dx.doi.org/10.1097/BRS.0000000000001229</a> .                                                                                                                                                                                                                                                                                                                                                                                                                                           |
| #1539 | Klineberg 2016 | Klineberg, Eric O; Passias, Peter G; Jalai, Cyrus M; Worley, Nancy; Sciubba, Daniel M; Burton, Douglas C; Gupta, Munish C; Soroceanu, Alex; Zebala, Luke P; Mundis, Gregory M Jr; Kim, Han Jo; Hamilton, D Kojo; Hart, Robert A; Ames, Christopher P; Lafage, Virginie; International Spine Study Group. Predicting Extended Length of Hospital Stay in an Adult Spinal Deformity Surgical Population. Spine, 2016, 41, 13, E798-805. <a href="https://dx.doi.org/10.1097/BRS.0000000000001391">https://dx.doi.org/10.1097/BRS.0000000000001391</a> .                                                                                                                                                                                       |

|       |                |                                                                                                                                                                                                                                                                                                                                                                                                                                                                                                                                                                                                                                                             |
|-------|----------------|-------------------------------------------------------------------------------------------------------------------------------------------------------------------------------------------------------------------------------------------------------------------------------------------------------------------------------------------------------------------------------------------------------------------------------------------------------------------------------------------------------------------------------------------------------------------------------------------------------------------------------------------------------------|
| #1541 | Lafage 2016    | Lafage, Renaud; Schwab, Frank; Challier, Vincent; Henry, Jensen K; Gum, Jeffrey; Smith, Justin; Hostin, Richard; Shaffrey, Christopher; Kim, Han J; Ames, Christopher; Scheer, Justin; Klineberg, Eric; Bess, Shay; Burton, Douglas; Lafage, Virginie; International Spine Study Group. Defining Spino-Pelvic Alignment Thresholds: Should Operative Goals in Adult Spinal Deformity Surgery Account for Age?. Spine, 2016, 41, 1, 22859. <a href="https://dx.doi.org/10.1097/BRS.0000000000001171">https://dx.doi.org/10.1097/BRS.0000000000001171</a> .                                                                                                   |
| #1543 | Park 2016      | Park, Paul; Wang, Michael Y; Nguyen, Stacie; Mundis, Gregory M Jr; La Marca, Frank; Uribe, Juan S; Anand, Neel; Ukonkwo, David O; Kanter, Adam S; Fessler, Richard; Eastlack, Robert K; Chou, Dean; Deviren, Vedat; Nunley, Pierce D; Shaffrey, Christopher I; Mummaneni, Praveen V; International Spine Study Group. Comparison of Complications and Clinical and Radiographic Outcomes Between Nonobese and Obese Patients with Adult Spinal Deformity Undergoing Minimally Invasive Surgery. World neurosurgery, 2016, 87, 101528275, 55-60. <a href="https://dx.doi.org/10.1016/j.wneu.2015.12.024">https://dx.doi.org/10.1016/j.wneu.2015.12.024</a> . |
| #1558 | Madhavan 2016  | Madhavan, Karthik; Chieng, Lee Onn; McGrath, Lynn; Hofstetter, Christoph P; Wang, Michael Y. Early experience with endoscopic foraminotomy in patients with moderate degenerative deformity. Neurosurgical focus, 2016, 40, 2, E6. <a href="https://dx.doi.org/10.3171/2015.11.FOCUS15511">https://dx.doi.org/10.3171/2015.11.FOCUS15511</a> .                                                                                                                                                                                                                                                                                                              |
| #1560 | Jiang 2016     | Jiang, Chuan-jie; Yang, Yong-jun; Zhou, Ji-ping; Yao, Shu-qiang; Yang, Kai; Wu, Rui; Tan, Yuan-chao. Applications of the scoliosis width-to-length ratio for guiding selection of the surgical approaches of degenerative lumbar scoliosis. BMC musculoskeletal disorders, 2016, 17, 100968565, 48. <a href="https://dx.doi.org/10.1186/s12891-016-0904-3">https://dx.doi.org/10.1186/s12891-016-0904-3</a> .                                                                                                                                                                                                                                               |
| #1572 | Rullander 2016 | Rullander, Anna-Clara; Lundstrom, Mats; Lindkvist, Marie; Hagglof, Bruno; Lindh, Viveca. Stress symptoms among adolescents before and after scoliosis surgery: correlations with postoperative pain. Journal of clinical nursing, 2016, 25, 44750, 1086-94. <a href="https://dx.doi.org/10.1111/jocn.13137">https://dx.doi.org/10.1111/jocn.13137</a> .                                                                                                                                                                                                                                                                                                     |
| #1574 | Fortin 2016    | Fortin, Carole; Grunstein, Erin; Labelle, Hubert; Parent, Stefan; Ehrmann Feldman, Debbie. Trunk imbalance in adolescent idiopathic scoliosis. The spine journal : official journal of the North American Spine Society, 2016, 16, 6, 687-93. <a href="https://dx.doi.org/10.1016/j.spinee.2016.02.033">https://dx.doi.org/10.1016/j.spinee.2016.02.033</a> .                                                                                                                                                                                                                                                                                               |
| #1576 | Jain 2016      | Jain, Amit; Lafage, Virginie; Kelly, Michael P; Hassanzadeh, Hamid; Neuman, Brian J; Sciubba, Daniel M; Bess, Shay; Shaffrey, Christopher I; Ames, Christopher P; Scheer, Justin K; Burton, Douglas; Gupta, Munish C; Hart, Robert; Hostin, Richard A; Kebaish, Khaled M; International Spine Study Group. Validity, Reliability, and Responsiveness of SRS-7 as an Outcomes Assessment Instrument for Operatively Treated Patients With Adult Spinal Deformity. Spine, 2016, 41, 18, 1463-8. <a href="https://dx.doi.org/10.1097/BRS.0000000000001540">https://dx.doi.org/10.1097/BRS.0000000000001540</a> .                                               |
| #1582 | Matamalas 2016 | Matamalas, Antonia; Bago, Juan; D Agata, Elisabetta; Pellise, Ferran. Validity and reliability of photographic measures to evaluate waistline asymmetry in idiopathic scoliosis. European spine journal : official publication of the European Spine Society, the European Spinal Deformity Society, and the European Section of the Cervical Spine Research Society, 2016, 25, 10, 3170-3179. .                                                                                                                                                                                                                                                            |

|       |                |                                                                                                                                                                                                                                                                                                                                                                                                                                                                                                                                                                                                                                                                                                           |
|-------|----------------|-----------------------------------------------------------------------------------------------------------------------------------------------------------------------------------------------------------------------------------------------------------------------------------------------------------------------------------------------------------------------------------------------------------------------------------------------------------------------------------------------------------------------------------------------------------------------------------------------------------------------------------------------------------------------------------------------------------|
| #1583 | Mariconda 2016 | Mariconda, Massimo; Andolfi, Claudia; Cerbasi, Simone; Servodidio, Valeria. Effect of surgical correction of adolescent idiopathic scoliosis on the quality of life: a prospective study with a minimum 5-year follow-up. <i>European spine journal : official publication of the European Spine Society, the European Spinal Deformity Society, and the European Section of the Cervical Spine Research Society</i> , 2016, 25, 10, 3331-3340. .                                                                                                                                                                                                                                                         |
| #1589 | Hostin 2016    | Hostin, Richard; Robinson, Chessie; O'Brien, Michael; Ames, Christopher; Schwab, Frank; Smith, Justin S; Lafage, Virginie; Gupta, Munish; Hart, Robert; Burton, Douglas; Bess, Shay; Schaffrey, Christopher; McCarthy, Ian. A Multicenter Comparison of Inpatient Resource Use for Adult Spinal Deformity Surgery. <i>Spine</i> , 2016, 41, 7, 603-9. <a href="https://dx.doi.org/10.1097/BRS.0000000000001280">https://dx.doi.org/10.1097/BRS.0000000000001280</a> .                                                                                                                                                                                                                                     |
| #1592 | Monticone 2016 | Monticone, Marco; Ambrosini, Emilia; Cazzaniga, Daniele; Rocca, Barbara; Motta, Lorenzo; Cerri, Cesare; Brayda-Bruno, Marco; Lovi, Alessio. Adults with idiopathic scoliosis improve disability after motor and cognitive rehabilitation: results of a randomised controlled trial. <i>European spine journal : official publication of the European Spine Society, the European Spinal Deformity Society, and the European Section of the Cervical Spine Research Society</i> , 2016, 25, 10, 3120-3129. .                                                                                                                                                                                               |
| #1604 | Jalal 2016     | Jalal, Cyrus IV; Passias, Peter G; Lafage, Virginie; Smith, Justin S; Lafage, Renaud; Poorman, Gregory W; Diebo, Basser; Labaud, Bartolomey; Neuman, Brian J; Scheer, Justin K; Shaffrey, Christopher I; Bess, Shay; Schwab, Frank; Ames, Christopher P; International Spine Study Group (ISSG). A comparative analysis of the prevalence and characteristics of cervical malalignment in adults presenting with thoracolumbar spine deformity based on variations in treatment approach over 2 years. <i>European spine journal : official publication of the European Spine Society, the European Spinal Deformity Society, and the European Section of the Cervical Spine Research Society</i> , 2016, |
| #1605 | Wang 2016      | Wang, Guodong; Cui, Xingang; Jiang, Zhensong; Li, Tao; Liu, Xiaoyang; Sun, Jianmin. Evaluation and Surgical Management of Adult Degenerative Scoliosis Associated With Lumbar Stenosis. <i>Medicine</i> , 2016, 95, 15, e3394. <a href="https://dx.doi.org/10.1097/MD.0000000000003394">https://dx.doi.org/10.1097/MD.0000000000003394</a> .                                                                                                                                                                                                                                                                                                                                                              |
| #1613 | Hawasli 2016   | Hawasli, Ammar H; Chang, Jodie; Yarbrough, Chester K; Steger-May, Karen; Lenke, Lawrence G; Dorward, Ian G. Interpedicular height as a predictor of radicular pain in adult degenerative scoliosis. <i>The spine journal : official journal of the North American Spine Society</i> , 2016, 16, 9, 1070-8. <a href="https://dx.doi.org/10.1016/j.spinee.2016.04.017">https://dx.doi.org/10.1016/j.spinee.2016.04.017</a> .                                                                                                                                                                                                                                                                                |
| #1616 | Hostin 2016    | Hostin, Richard; O'Brien, Michael; McCarthy, Ian; Bess, Shay; Gupta, Munish; Klineberg, Eric; International Spine Study Group, Denver, CO. Retrospective Study of Anterior Interbody Fusion Rates and Patient Outcomes of Using Mineralized Collagen and Bone Marrow Aspirate in Multilevel Adult Spinal Deformity Surgery. <i>Clinical spine surgery</i> , 2016, 29, 8, E384-8. <a href="https://dx.doi.org/10.1097/BSD.0b013e318292468f">https://dx.doi.org/10.1097/BSD.0b013e318292468f</a> .                                                                                                                                                                                                          |
| #1640 | Negrini 2016   | Negrini, Stefano; Minozzi, Silvia; Bettany-Saltikov, Josette; Chockalingam, Nachiappan; Grivas, Theodoros B; Kotwicki, Tomasz; Maruyama, Toru; Romano, Michele; Zaina, Fabio. Braces for Idiopathic Scoliosis in Adolescents. <i>Spine</i> , 2016, 41, 23, 1813-1825. .                                                                                                                                                                                                                                                                                                                                                                                                                                   |

|       |               |                                                                                                                                                                                                                                                                                                                                                                                                                                                                                                                                                                                                                                                                       |
|-------|---------------|-----------------------------------------------------------------------------------------------------------------------------------------------------------------------------------------------------------------------------------------------------------------------------------------------------------------------------------------------------------------------------------------------------------------------------------------------------------------------------------------------------------------------------------------------------------------------------------------------------------------------------------------------------------------------|
| #1646 | Grant 2016    | Grant, Daniel R; Schoenleber, Scott J; McCarthy, Alicia M; Neiss, Geraldine I; Yorgova, Petya K; Rogers, Kenneth J; Gabos, Peter G; Shah, Suken A. Are We Prescribing Our Patients Too Much Pain Medication? Best Predictors of Narcotic Usage After Spinal Surgery for Scoliosis. The Journal of bone and joint surgery. American volume, 2016, 98, 18, 1555-62. <a href="https://dx.doi.org/10.2106/JBJS.16.00101">https://dx.doi.org/10.2106/JBJS.16.00101</a> .                                                                                                                                                                                                   |
| #1647 | Du 2016       | Du, Chunping; Yu, Jiadan; Zhang, Jiaqi; Jiang, Jiaojiao; Lai, Huabin; Liu, Wei; Liu, Yang; Li, Hao; Wang, Pu. Relevant areas of functioning in patients with adolescent idiopathic scoliosis on the International Classification of Functioning, Disability and Health: The patients' perspective. Journal of rehabilitation medicine, 2016, 48, 9, 806-814. <a href="https://dx.doi.org/10.2340/16501977-2147">https://dx.doi.org/10.2340/16501977-2147</a> .                                                                                                                                                                                                        |
| #1650 | Banno 2016    | Banno, Tomohiro; Hasegawa, Tomohiko; Yamato, Yu; Kobayashi, Sho; Togawa, Daisuke; Oe, Shin; Mihara, Yuki; Matsuyama, Yukihiro. T1 Pelvic Angle Is a Useful Parameter for Postoperative Evaluation in Adult Spinal Deformity Patients. Spine, 2016, 41, 21, 1641-1648. .                                                                                                                                                                                                                                                                                                                                                                                               |
| #1652 | Chapman 2016  | Chapman, Todd M Jr; Bairds, Christine K; Lurie, Jon D; Glassman, Steven D; Schwab, Frank J; Sarrrey, Christopher I; Larage, virginie; Boachie-Adjei, Oheneba; Kim, Han J; Smith, Justin S; Crawford, Charles H 3rd; Lenke, Lawrence G; Buchowski, Jacob M; Edwards, Charles 2nd; Koski, Tyler; Parent, Stefan; Lewis, Stephen; Kang, Daniel G; McClendon, Jamal Jr; Metz, Lionel; Zebala, Lukas P; Kelly, Michael P; Spratt, Kevin F; Bridwell, Keith H. Baseline Patient-Reported Outcomes Correlate Weakly With Radiographic Parameters: A Multicenter, Prospective NIH Adult Symptomatic Lumbar Scoliosis Study of 286 Patients. Spine, 2016, 41, 22, 1701-1708. . |
| #1657 | Harris 2016   | Harris, Bradley Y; Kotn, Matthew F; Diebo, Basse G; Bess, Snay; Theologis, Alexander A; Schneer, Justin K; Schwab, Frank J; Larage, virginie; Ames, Christopher P; Hodes, Richard; Ayamga, Jennifer; Boachie-Adjei, Oheneba; International Spine Study Group. Investigating the Universality of Preoperative Health-Related Quality of Life (HRQoL) for Surgically Treated Spinal Deformity in Young Adults: A Propensity Score-Matched Comparison Between African and US Populations. Spine deformity, 2016, 4, 5, 351-357. <a href="https://dx.doi.org/10.1016/j.jspd.2016.03.006">https://dx.doi.org/10.1016/j.jspd.2016.03.006</a> .                              |
| #1660 | Crawford 2016 | Crawford, Charles H 3rd; Glassman, Steven D; Bridwell, Keith H; Carreon, Leah Y. The Substantial Clinical Benefit Threshold for SRS-22R Domains After Surgical Treatment of Adult Spinal Deformity. Spine deformity, 2016, 4, 5, 373-377. <a href="https://dx.doi.org/10.1016/j.jspd.2016.05.001">https://dx.doi.org/10.1016/j.jspd.2016.05.001</a> .                                                                                                                                                                                                                                                                                                                 |
| #1663 | Pizones 2016  | Pizones, Javier; Martin-Buitrago, Mar Perez; Sanchez Perez-Grueso, Francisco Javier; Pellise, Ferran; Alanay, Ahmet; Obeid, Ibrahim; Kleinstuck, Frank; Acaroglu, Emre R; ESSG European Spine Study Group. Untreated Thoracic Curve in Adult Idiopathic Scoliosis: What Are Patients' Concerns?. Spine deformity, 2016, 4, 6, 439-445. <a href="https://dx.doi.org/10.1016/j.jspd.2016.05.004">https://dx.doi.org/10.1016/j.jspd.2016.05.004</a> .                                                                                                                                                                                                                    |
| #1669 | Ersen 2016    | Ersen, O; Bilgic, S; Koca, K; Ege, T; Oguz, E; Bilekli, A B. Difference between Spinecor brace and Thoracolumbosacral orthosis for deformity correction and quality of life in adolescent idiopathic scoliosis. Acta orthopaedica Belgica, 2016, 82, 4, 710-714. .                                                                                                                                                                                                                                                                                                                                                                                                    |



|       |                 |                                                                                                                                                                                                                                                                                                                                                                                                                                                                                                           |
|-------|-----------------|-----------------------------------------------------------------------------------------------------------------------------------------------------------------------------------------------------------------------------------------------------------------------------------------------------------------------------------------------------------------------------------------------------------------------------------------------------------------------------------------------------------|
| #1679 | Monticone 2004  | Monticone, M; Carabalona, R; Negrini, S. Reliability of the Scoliosis Research Society-22 Patient Questionnaire (Italian version) in mild adolescent vertebral deformities. <i>Europa medicophysica</i> , 2004, 40, 3, 191-7. .                                                                                                                                                                                                                                                                           |
| #1690 | Vasiliadis 2006 | Vasiliadis, Elias; Grivas, Theodoros B; Gkoltsiou, Konstantina. Development and preliminary validation of Brace Questionnaire (BrQ): a new instrument for measuring quality of life of brace treated scoliotics. <i>Scoliosis</i> , 2006, 1, 101271527, 7. .                                                                                                                                                                                                                                              |
| #1692 | Rowe 2006       | Rowe, Dale E; Feise, Ronald J; Crowther, Edward R; Grod, Jaroslaw P; Menke, J Michael; Goldsmith, Charles H; Stoline, Michael R; Souza, Thomas A; Kambach, Brandon. Chiropractic manipulation in adolescent idiopathic scoliosis: a pilot study. <i>Chiropractic &amp; osteopathy</i> , 2006, 14, 101245797, 15. .                                                                                                                                                                                        |
| #1694 | Pineda 2006     | Pineda, Sonia; Bago, Juan; Gilperez, Carmen; Climent, Jose M. Validity of the Walter Reed Visual Assessment Scale to measure subjective perception of spine deformity in patients with idiopathic scoliosis. <i>Scoliosis</i> , 2006, 1, 101271527, 18. .                                                                                                                                                                                                                                                 |
| #1697 | Kotwicki 2007   | Kotwicki, Tomasz; Kinel, Edyta; Stryla, Wanda; Szulc, Andrzej. Estimation of the stress related to conservative scoliosis therapy: an analysis based on BSSQ questionnaires. <i>Scoliosis</i> , 2007, 2, 101271527, 1. .                                                                                                                                                                                                                                                                                  |
| #1705 | Zhao 2007       | Zhao, Li; Zhang, Yong; Sun, Xiaotang; Du, Qing; Shang, Lei. The Scoliosis Research Society-22 questionnaire adapted for adolescent idiopathic scoliosis patients in China: reliability and validity analysis. <i>Journal of children's orthopaedics</i> , 2007, 1, 6, 351-5.<br><a href="https://dx.doi.org/10.1007/s11832-007-0061-1">https://dx.doi.org/10.1007/s11832-007-0061-1</a> .                                                                                                                 |
| #1726 | Cahill 2014     | Cahill, Patrick J; Pahys, Joshua M; Asghar, Jahangir; Yaszay, Burt; Marks, Michelle C; Bastrom, Tracey P; Lonner, Baron S; Shah, Suken A; Shufflebarger, Harry L; Newton, Peter O; Betz, Randal R; Samdani, Amer F. The effect of surgeon experience on outcomes of surgery for adolescent idiopathic scoliosis. <i>The Journal of bone and joint surgery. American volume</i> , 2014, 96, 16, 1333-9.<br><a href="https://dx.doi.org/10.2106/JBJS.M.01265">https://dx.doi.org/10.2106/JBJS.M.01265</a> . |
| #1739 | Fu 2014         | Fu, Lingjie; Chang, Michael S; Crandall, Dennis G; Revella, Jan. Does obesity affect surgical outcomes in degenerative scoliosis?. <i>Spine</i> , 2014, 39, 24, 2049-55. <a href="https://dx.doi.org/10.1097/BRS.0000000000000600">https://dx.doi.org/10.1097/BRS.0000000000000600</a> .                                                                                                                                                                                                                  |

|       |                   |                                                                                                                                                                                                                                                                                                                                                                                                                                                                                                                                                                                                                                                                                  |
|-------|-------------------|----------------------------------------------------------------------------------------------------------------------------------------------------------------------------------------------------------------------------------------------------------------------------------------------------------------------------------------------------------------------------------------------------------------------------------------------------------------------------------------------------------------------------------------------------------------------------------------------------------------------------------------------------------------------------------|
| #1749 | Protopsaltis 2014 | Protopsaltis, I nemistocies; Schwab, Frank; Bronsard, Nicolas; Smith, Justin S; Kiineberg, Eric; Mundis, Gregory; Ryan, Devon J; Hostin, Richard; Hart, Robert; Burton, Douglas; Ames, Christopher; Shaffrey, Christopher; Bess, Shay; Errico, Thomas; Lafage, Virginie; International Spine Study Group. TheT1 pelvic angle, a novel radiographic measure of global sagittal deformity, accounts for both spinal inclination and pelvic tilt and correlates with health-related quality of life. The Journal of bone and joint surgery. American volume, 2014, 96, 19, 1631-40. <a href="https://dx.doi.org/10.2106/JBJS.M.01459">https://dx.doi.org/10.2106/JBJS.M.01459</a> . |
| #1755 | Plaszewski 2014   | Plaszewski, Maciej; Cieslinski, Igor; Kowalski, Pawel; Truszczynska, Aleksandra; Nowobilski, Roman. Does scoliosis-specific exercise treatment in adolescence alter adult quality of life?. TheScientificWorldJournal, 2014, 2014, 101131163, 539671. <a href="https://dx.doi.org/10.1155/2014/539671">https://dx.doi.org/10.1155/2014/539671</a> .                                                                                                                                                                                                                                                                                                                              |
| #1762 | Rushton 2015      | Rushton, Paul R P; Grevitt, Michael P; Sell, Philip J. Anterior or posterior surgery for right thoracic adolescent idiopathic scoliosis (AIS)? A prospective cohorts' comparison using radiologic and functional outcomes. Journal of spinal disorders & techniques, 2015, 28, 3, 29434. <a href="https://dx.doi.org/10.1097/BSD.0b013e3182693e33">https://dx.doi.org/10.1097/BSD.0b013e3182693e33</a> .                                                                                                                                                                                                                                                                         |
| #1766 | Zavatsky 2015     | Zavatsky, Joseph M; Peters, Austin J; Nahvi, Farzon A; Bharucha, Neil J; Trobisch, Per D; Kean, Kristin E; Richard, Sandra; Bucello, Yolanda; Valdevit, Antonio; Lonner, Baron S. Disease severity and treatment in adolescent idiopathic scoliosis: the impact of race and economic status. The spine journal : official journal of the North American Spine Society, 2015, 15, 5, 939-43. <a href="https://dx.doi.org/10.1016/j.spinee.2013.06.043">https://dx.doi.org/10.1016/j.spinee.2013.06.043</a> .                                                                                                                                                                      |
| #1776 | Pellise 2015      | Pellise, Ferran; Vila-Casademunt, Aiba; Ferrer, Montse; Domingo-Sabat, Montse; Bago, Juan; Perez-Grueso, Francisco J S; Alanay, Anmet; Mannion, A F; Acaroglu, Emre; European Spine Study Group, ESSG. Impact on health related quality of life of adult spinal deformity (ASD) compared with other chronic conditions. European spine journal : official publication of the European Spine Society, the European Spinal Deformity Society, and the European Section of the Cervical Spine Research Society, 2015, 24, 1, 44631. <a href="https://dx.doi.org/10.1007/s00586-014-3542-1">https://dx.doi.org/10.1007/s00586-014-3542-1</a> .                                       |
| #1782 | McCarthy 2015     | McCarthy, Ian M. Putting the Patient in Patient Reported Outcomes: A Robust Methodology for Health Outcomes Assessment. Health economics, 2015, 24, 12, 1588-603. <a href="https://dx.doi.org/10.1002/hec.3113">https://dx.doi.org/10.1002/hec.3113</a> .                                                                                                                                                                                                                                                                                                                                                                                                                        |
| #1791 | Rainoldi 2015     | Rainoldi, Laura; Zaina, Fabio; Villafane, Jorge H; Donzelli, Sabrina; Negrini, Stefano. Quality of life in normal and idiopathic scoliosis adolescents before diagnosis: reference values and discriminative validity of the SRS-22. A cross-sectional study of 1,205 pupils. The spine journal : official journal of the North American Spine Society, 2015, 15, 4, 662-7. <a href="https://dx.doi.org/10.1016/j.spinee.2014.12.004">https://dx.doi.org/10.1016/j.spinee.2014.12.004</a> .                                                                                                                                                                                      |
| #1798 | Albayrak 2015     | Albayrak, Akif; Buyuk, Abdul Fettah; Ucpunar, Hanifi; Balioglu, Mehmet Bulent; Kargin, Deniz; Kaygusuz, Mehmet Akif. Pre- and postoperative photographs and surgical outcomes in patients with Lenke type 1 adolescent idiopathic scoliosis. Spine, 2015, 40, 7, 469-74. <a href="https://dx.doi.org/10.1097/BRS.0000000000000796">https://dx.doi.org/10.1097/BRS.0000000000000796</a> .                                                                                                                                                                                                                                                                                         |

|       |               |                                                                                                                                                                                                                                                                                                                                                                                                                                                                                                                                                                                                                                                                                                                                |
|-------|---------------|--------------------------------------------------------------------------------------------------------------------------------------------------------------------------------------------------------------------------------------------------------------------------------------------------------------------------------------------------------------------------------------------------------------------------------------------------------------------------------------------------------------------------------------------------------------------------------------------------------------------------------------------------------------------------------------------------------------------------------|
| #1804 | Park 2015     | Park, Paul; Wang, Michael Y; Lafage, Virginie; Nguyen, Stacie; Ziewacz, John; Okonkwo, David O; Uribe, Juan S; Eastlack, Robert K; Anand, Neel; Haque, Raqeeb; Fessler, Richard G; Kanter, Adam S; Deviren, Vedat; La Marca, Frank; Smith, Justin S; Shaffrey, Christopher I; Mundis, Gregory M Jr; Mummaneni, Praveen V; International Spine Study Group. Comparison of two minimally invasive surgery strategies to treat adult spinal deformity. Journal of neurosurgery. Spine, 2015, 22, 4, 374-80. <a href="https://dx.doi.org/10.3171/2014.9.SPINE131004">https://dx.doi.org/10.3171/2014.9.SPINE131004</a> .                                                                                                           |
| #1814 | Scheer 2015   | Scheer, Justin K; Smith, Justin S; Clark, Aaron J; Lafage, Virginie; Kim, Han Jo; Koistinen, John D; Eastlack, Robert; Hart, Robert A; Protopsaltis, Themistocles S; Kelly, Michael P; Kebaish, Khaled; Gupta, Munish; Klineberg, Eric; Hostin, Richard; Shaffrey, Christopher I; Schwab, Frank; Ames, Christopher P; International Spine Study Group. Comprehensive study of back and leg pain improvements after adult spinal deformity surgery: analysis of 421 patients with 2-year follow-up and of the impact of the surgery on treatment satisfaction. Journal of neurosurgery. Spine, 2015, 22, 5, 540-53. <a href="https://dx.doi.org/10.3171/2014.10.SPINE14475">https://dx.doi.org/10.3171/2014.10.SPINE14475</a> . |
| #1818 | Crawford 2015 | Crawford, Charles H 3rd; Glassman, Steven D; Bridwell, Keith H; Berven, Sigurd H; Carreon, Leah Y. The minimum clinically important difference in SRS-22R total score, appearance, activity and pain domains after surgical treatment of adult spinal deformity. Spine, 2015, 40, 6, 377-81. <a href="https://dx.doi.org/10.1097/BRS.0000000000000761">https://dx.doi.org/10.1097/BRS.0000000000000761</a> .                                                                                                                                                                                                                                                                                                                   |
| #1819 | Aykac 2015    | Aykac, Bilal; Ayhan, Selim; Yuksel, Selcen; Guler, Umit Ozgur; Pellise, Ferran; Alanay, Ahmet; Perez-Grueso, Francisco Javier Sanchez; Acaroglu, Emre; ESSG European Spine Study Group. Sagittal alignment of cervical spine in adult idiopathic scoliosis. European spine journal : official publication of the European Spine Society, the European Spinal Deformity Society, and the European Section of the Cervical Spine Research Society, 2015, 24, 6, 1175-82. <a href="https://dx.doi.org/10.1007/s00586-015-3868-3">https://dx.doi.org/10.1007/s00586-015-3868-3</a> .                                                                                                                                               |
| #1824 | Passias 2015  | Passias, Peter G; Soroceanu, Alexandra; Scheer, Justin; Yang, Sun; Boniello, Anthony; Smith, Justin S; Protopsaltis, Themistocles; Kim, Han J; Schwab, Frank; Gupta, Munish; Klineberg, Eric; Mundis, Gregory; Lafage, Renaud; Hart, Robert; Shaffrey, Christopher; Lafage, Virginie; Ames, Christopher; International Spine Study Group. Magnitude of preoperative cervical lordotic compensation and C2-T3 angle are correlated to increased risk of postoperative sagittal spinal pelvic malalignment in adult thoracolumbar deformity patients at 2-year follow-up. The spine journal : official journal of the North American Spine Society, 2015, 15, 8, 1756-63.                                                        |
| #1836 | Haidar 2015   | Haidar, Rachid K; Kassak, Kassem; Masrouha, Karim; Ibrahim, Kamal; Mhaidli, Hani. Reliability and validity of an adapted Arabic version of the Scoliosis Research Society-22r Questionnaire. Spine, 2015, 40, 17, E971-7. <a href="https://dx.doi.org/10.1097/BRS.0000000000000956">https://dx.doi.org/10.1097/BRS.0000000000000956</a> .                                                                                                                                                                                                                                                                                                                                                                                      |
| #1839 | Gum 2015      | Gum, Jeffrey L; Bridwell, Keith H; Lenke, Lawrence G; Bumpass, David B; Sugrue, Patrick A; Karikari, Isaac O; Carreon, Leah Y. SRS22R Appearance Domain Correlates Most With Patient Satisfaction After Adult Deformity Surgery to the Sacrum at 5-year Follow-up. Spine, 2015, 40, 16, 1297-302. <a href="https://dx.doi.org/10.1097/BRS.0000000000000961">https://dx.doi.org/10.1097/BRS.0000000000000961</a> .                                                                                                                                                                                                                                                                                                              |
| #1840 | Godzik 2015   | Godzik, Jakub; Holekamp, Terrence F; Limbrick, David D; Lenke, Lawrence G; Park, T S; Ray, Wilson Z; Bridwell, Keith H; Kelly, Michael P. Risks and outcomes of spinal deformity surgery in Chiari malformation, Type 1, with syringomyelia versus adolescent idiopathic scoliosis. The spine journal : official journal of the North American Spine Society, 2015, 15, 9, 37469. <a href="https://dx.doi.org/10.1016/j.spinee.2015.04.048">https://dx.doi.org/10.1016/j.spinee.2015.04.048</a> .                                                                                                                                                                                                                              |

|       |                   |                                                                                                                                                                                                                                                                                                                                                                                                                                                                                                                                                                                                                                                                                                                                                                                                                                                                                                                                                                                                                                                                                                                                                       |
|-------|-------------------|-------------------------------------------------------------------------------------------------------------------------------------------------------------------------------------------------------------------------------------------------------------------------------------------------------------------------------------------------------------------------------------------------------------------------------------------------------------------------------------------------------------------------------------------------------------------------------------------------------------------------------------------------------------------------------------------------------------------------------------------------------------------------------------------------------------------------------------------------------------------------------------------------------------------------------------------------------------------------------------------------------------------------------------------------------------------------------------------------------------------------------------------------------|
| #1844 | Protopsaltis 2015 | Protopsaltis, I nemistocies S; Seneer, Justin K; Terran, Jamie S; Smith, Justin S; Hamilton, D Kojo; Kim, Han Jo; Mundis, Greg M Jr; Hart, Robert A; McCarthy, Ian M; Klineberg, Eric; Lafage, Virginie; Bess, Shay; Schwab, Frank; Shaffrey, Christopher I; Ames, Christopher P; International Spine Study Group. How the neck affects the back: changes in regional cervical sagittal alignment correlate to HRQOL improvement in adult thoracolumbar deformity patients at 2-year follow-up. Journal of neurosurgery. Spine, 2015, 23, 2, 153-8. <a href="https://dx.doi.org/10.3171/2014.11.SPINE1441">https://dx.doi.org/10.3171/2014.11.SPINE1441</a> .                                                                                                                                                                                                                                                                                                                                                                                                                                                                                         |
| #1850 | Jain 2015         | Jain, Amit; Sponseller, Paul D; Negrini, Stefano; Newton, Peter O; Cahill, Patrick J; Bastrom, Tracey P; Marks, Michelle C; Harms Study Group. SRS-7: A Valid, Responsive, Linear, and Unidimensional Functional Outcome Measure for Operatively Treated Patients With AIS. Spine, 2015, 40, 9, 650-5. <a href="https://dx.doi.org/10.1097/BRS.0000000000000836">https://dx.doi.org/10.1097/BRS.0000000000000836</a> .<br>Smith, Justin S; Shaffrey, Christopher I; Lafage, Virginie; Schwab, Frank; Seneer, Justin K; Protopsaltis, I nemistocies; Klineberg, Eric; Gupta, Munish; Hostin, Richard; Fu, Kai-Ming G; Mundis, Gregory M Jr; Kim, Han Jo; Deviren, Vedat; Soroceanu, Alex; Hart, Robert A; Burton, Douglas C; Bess, Shay; Ames, Christopher P; International Spine Study Group. Comparison of best versus worst clinical outcomes for adult spinal deformity surgery: a retrospective review of a prospectively collected, multicenter database with 2-year follow-up. Journal of neurosurgery. Spine, 2015, 23, 3, 349-59. <a href="https://dx.doi.org/10.3171/2014.12.SPINE14777">https://dx.doi.org/10.3171/2014.12.SPINE14777</a> . |
| #1851 | Smith 2015        |                                                                                                                                                                                                                                                                                                                                                                                                                                                                                                                                                                                                                                                                                                                                                                                                                                                                                                                                                                                                                                                                                                                                                       |
| #1863 | Lange 2009        | Lange, Johan Emil; Steen, Harald; Brox, Jens Ivar. Long-term results after Boston brace treatment in adolescent idiopathic scoliosis. Scoliosis, 2009, 4, 101271527, 17. <a href="https://dx.doi.org/10.1186/1748-7161-4-17">https://dx.doi.org/10.1186/1748-7161-4-17</a> .                                                                                                                                                                                                                                                                                                                                                                                                                                                                                                                                                                                                                                                                                                                                                                                                                                                                          |
| #1870 | Bago 2010         | Bago, Juan; Sanchez-Raya, Judith; Perez-Grueso, Francisco Javier Sanchez; Climent, Jose Maria. The Trunk Appearance Perception Scale (TAPS): a new tool to evaluate subjective impression of trunk deformity in patients with idiopathic scoliosis. Scoliosis, 2010, 5, 101271527, 6. <a href="https://dx.doi.org/10.1186/1748-7161-5-6">https://dx.doi.org/10.1186/1748-7161-5-6</a> .                                                                                                                                                                                                                                                                                                                                                                                                                                                                                                                                                                                                                                                                                                                                                               |
| #1874 | D'Agata 2010      | D'Agata, Elisabetta; Testor, Carles Perez; Rigo, Manuel. Spanish validation of Bad Sobernheim Stress Questionnaire (BSSQ (brace).es) for adolescents with braces. Scoliosis, 2010, 5, 101271527, 15. <a href="https://dx.doi.org/10.1186/1748-7161-5-15">https://dx.doi.org/10.1186/1748-7161-5-15</a> .                                                                                                                                                                                                                                                                                                                                                                                                                                                                                                                                                                                                                                                                                                                                                                                                                                              |
| #1879 | Aulisa 2010       | Aulisa, Angelo G; Guzzanti, Vincenzo; Perisano, Carlo; Marzetti, Emanuele; Specchia, Alessandro; Galli, Marco; Giordano, Marco; Aulisa, Lorenzo. Determination of quality of life in adolescents with idiopathic scoliosis subjected to conservative treatment. Scoliosis, 2010, 5, 101271527, 21. <a href="https://dx.doi.org/10.1186/1748-7161-5-21">https://dx.doi.org/10.1186/1748-7161-5-21</a> .                                                                                                                                                                                                                                                                                                                                                                                                                                                                                                                                                                                                                                                                                                                                                |
| #1898 | Morningstar 2011  | Morningstar, Mark W. Outcomes for adult scoliosis patients receiving chiropractic rehabilitation: a 24-month retrospective analysis. Journal of chiropractic medicine, 2011, 10, 3, 179-84. <a href="https://dx.doi.org/10.1016/j.jcm.2011.01.006">https://dx.doi.org/10.1016/j.jcm.2011.01.006</a> .                                                                                                                                                                                                                                                                                                                                                                                                                                                                                                                                                                                                                                                                                                                                                                                                                                                 |

|       |                 |                                                                                                                                                                                                                                                                                                                                                                                                                                              |
|-------|-----------------|----------------------------------------------------------------------------------------------------------------------------------------------------------------------------------------------------------------------------------------------------------------------------------------------------------------------------------------------------------------------------------------------------------------------------------------------|
| #1901 | Nam 2011        | Nam, Hee-Seung; Park, Yong Bum. Effects of transforaminal injection for degenerative lumbar scoliosis combined with spinal stenosis. <i>Annals of rehabilitation medicine</i> , 2011, 35, 4, 514-23. <a href="https://dx.doi.org/10.5535/arm.2011.35.4.514">https://dx.doi.org/10.5535/arm.2011.35.4.514</a> .                                                                                                                               |
| #1903 | Davies 2011     | Davies, Evan; Norvell, Daniel; Hermismeyer, Jeffrey. Efficacy of bracing versus observation in the treatment of idiopathic scoliosis. <i>Evidence-based spine-care journal</i> , 2011, 2, 2, 25-34. <a href="https://dx.doi.org/10.1055/s-0030-1267102">https://dx.doi.org/10.1055/s-0030-1267102</a> .                                                                                                                                      |
| #1907 | Yu 2012         | Yu, Ching-Hsiao; Chen, Po-Quang; Ma, Shu-Chuang; Pan, Chee-Huan. Segmental correction of adolescent idiopathic scoliosis by all-screw fixation method in adolescents and young adults. minimum 5 years follow-up with SF-36 questionnaire. <i>Scoliosis</i> , 2012, 7, 101271527, 5. <a href="https://dx.doi.org/10.1186/1748-7161-7-5">https://dx.doi.org/10.1186/1748-7161-7-5</a> .                                                       |
| #1923 | Potoupnis 2012  | Potoupnis, M; Papavasiliou, K; Kenanidis, E; Pellios, S; Kapetanou, A; Sayegh, F; Kapetanios, G. Reliability and concurrent validity of the adapted Greek version of the Scoliosis Research Society-22r Questionnaire. A cross-sectional study performed on conservatively treated patients. <i>Hippokratia</i> , 2012, 16, 3, 225-9. .                                                                                                      |
| #1928 | Al-Aubaidi 2013 | Al-Aubaidi, Zaid Tj; Tropp, Hans; Pedersen, Niels W; Jespersen, Stig M. Comparison of in-and outpatients protocols for providence night time only bracing in AIS patients - compliance and satisfaction. <i>Scoliosis</i> , 2013, 8, 101271527, 6. <a href="https://dx.doi.org/10.1186/1748-7161-8-6">https://dx.doi.org/10.1186/1748-7161-8-6</a> .                                                                                         |
| #1934 | Aulisa 2013     | Aulisa, Angelo G; Guzzanti, Vincenzo; Galli, Marco; Erra, Carmen; Scudieri, Giorgio; Padua, Luca. Validation of Italian version of Brace Questionnaire (BrQ). <i>Scoliosis</i> , 2013, 8, 1, 13. <a href="https://dx.doi.org/10.1186/1748-7161-8-13">https://dx.doi.org/10.1186/1748-7161-8-13</a> .                                                                                                                                         |
| #1952 | Chan 2014       | Chan, Siu Ling; Cheung, Kenneth Mc; Luk, Keith Dk; Wong, Kenneth Wh; Wong, Man Sang. A correlation study between in-brace correction, compliance to spinal orthosis and health-related quality of life of patients with Adolescent Idiopathic Scoliosis. <i>Scoliosis</i> , 2014, 9, 1, 1. <a href="https://dx.doi.org/10.1186/1748-7161-9-1">https://dx.doi.org/10.1186/1748-7161-9-1</a> .                                                 |
| #1956 | Liu 2014        | Liu, Shian; Schwab, Frank; Smith, Justin S; Klineberg, Eric; Ames, Christopher P; Mundis, Gregory; Hostin, Richard; Kebaish, Khaled; Deviren, Vedat; Gupta, Munish; Boachie-Adjei, Oheneba; Hart, Robert A; Bess, Shay; Lafage, Virginie. Likelihood of reaching minimal clinically important difference in adult spinal deformity: a comparison of operative and nonoperative treatment. <i>The Ochsner journal</i> , 2014, 14, 1, 67-77. . |

|       |                  |                                                                                                                                                                                                                                                                                                                                                                                                                                                                                                |
|-------|------------------|------------------------------------------------------------------------------------------------------------------------------------------------------------------------------------------------------------------------------------------------------------------------------------------------------------------------------------------------------------------------------------------------------------------------------------------------------------------------------------------------|
| #1960 | Rivett 2014      | Rivett, LouAnn; Stewart, Aimee; Potterton, Joanne. The effect of compliance to a Rigo System Cheneau brace and a specific exercise programme on idiopathic scoliosis curvature: a comparative study: SOSORT 2014 award winner. <i>Scoliosis</i> , 2014, 9, 101271527, 5. <a href="https://dx.doi.org/10.1186/1748-7161-9-5">https://dx.doi.org/10.1186/1748-7161-9-5</a> .                                                                                                                     |
| #1971 | D'Agata 2014     | D'Agata, Elisabetta; Rigo, Manuel; Perez-Testor, Carles; Puigvi, Nuria Casanovas; Castellano-Tejedor, Carmina. Emotional indicators in young patients with Idiopathic Scoliosis: a study through the drawing of Human Figure. <i>Scoliosis</i> , 2014, 9, 1, 24. <a href="https://dx.doi.org/10.1186/s13013-014-0024-5">https://dx.doi.org/10.1186/s13013-014-0024-5</a> .                                                                                                                     |
| #1995 | Pellios 2016     | Pellios, Stavros; Kenanidis, Eustathios; Potoupnis, Michael; Tsiridis, Eleftherios; Sayegh, Fares E; Kirkos, John; Kapetanios, George A. Curve progression 25 years after bracing for adolescent idiopathic scoliosis: long term comparative results between two matched groups of 18 versus 23 hours daily bracing. <i>Scoliosis and spinal disorders</i> , 2016, 11, 101675716, 3. <a href="https://dx.doi.org/10.1186/s13013-016-0065-z">https://dx.doi.org/10.1186/s13013-016-0065-z</a> . |
| #1996 | Lee 2016         | Lee, Hyejung; Choi, Jihea; Hwang, Jin-Ho; Park, Jung Hyun. Health-related quality of life of adolescents conservatively treated for idiopathic scoliosis in Korea: a cross-sectional study. <i>Scoliosis and spinal disorders</i> , 2016, 11, 101675716, 11. <a href="https://dx.doi.org/10.1186/s13013-016-0071-1">https://dx.doi.org/10.1186/s13013-016-0071-1</a> .                                                                                                                         |
| #2000 | Diarbakerli 2016 | Diarbakerli, Elias; Grauers, Anna; Moller, Hans; Abbott, Allan; Gerdhem, Paul. Adolescents with and without idiopathic scoliosis have similar self-reported level of physical activity: a cross-sectional study. <i>Scoliosis and spinal disorders</i> , 2016, 11, 101675716, 17. <a href="https://dx.doi.org/10.1186/s13013-016-0082-y">https://dx.doi.org/10.1186/s13013-016-0082-y</a> .                                                                                                    |
| #2006 | Lebel 2016       | Lebel, Andrea; Lebel, Victoria Ashley. Severe progressive scoliosis in an adult female possibly secondary thoracic surgery in childhood treated with scoliosis specific Schroth physiotherapy: Case presentation. <i>Scoliosis and spinal disorders</i> , 2016, 11, Suppl 2, 41. .                                                                                                                                                                                                             |
| #2020 | Theis 2017       | Theis, Jennifer C; Grauers, Anna; Diarbakerli, Elias; Savvides, Panayiotis; Abbott, Allan; Gerdhem, Paul. An observational study on surgically treated adult idiopathic scoliosis patients' quality of life outcomes at 1- and 2-year follow-ups and comparison to controls. <i>Scoliosis and spinal disorders</i> , 2017, 12, 101675716, 11. <a href="https://dx.doi.org/10.1186/s13013-017-0118-y">https://dx.doi.org/10.1186/s13013-017-0118-y</a> .                                        |
| #2021 | Teles 2017       | Teles, Alisson R; Mattei, Tobias A; Righesso, Orlando; Falavigna, Asdrubal. Effectiveness of Operative and Nonoperative Care for Adult Spinal Deformity: Systematic Review of the Literature. <i>Global spine journal</i> , 2017, 7, 2, 170-178. <a href="https://dx.doi.org/10.1177/2192568217699182">https://dx.doi.org/10.1177/2192568217699182</a> .                                                                                                                                       |

|       |                 |                                                                                                                                                                                                                                                                                                                                                                                                                                                                                                                                                                                    |
|-------|-----------------|------------------------------------------------------------------------------------------------------------------------------------------------------------------------------------------------------------------------------------------------------------------------------------------------------------------------------------------------------------------------------------------------------------------------------------------------------------------------------------------------------------------------------------------------------------------------------------|
| #2022 | Deceuninck 2017 | Deceuninck, Julie; Tirat-Herbert, Aurelie; Rodriguez Martinez, Nuria; Bernard, Jean-Claude. French validation of the Brace Questionnaire (BrQ). <i>Scoliosis and spinal disorders</i> , 2017, 12, 101675716, 18. <a href="https://dx.doi.org/10.1186/s13013-017-0126-y">https://dx.doi.org/10.1186/s13013-017-0126-y</a> .                                                                                                                                                                                                                                                         |
| #2024 | Rodrigues 2017  | Rodrigues, Luciano Miller Reis; Gotfryd, Alberto Ofenhejm; Machado, Andre Nunes; Defino, Matheus; Asano, Leonardo Yukio Jorge. Adolescent idiopathic scoliosis: surgical treatment and quality of life. <i>Acta ortopedica brasileira</i> , 2017, 25, 3, 85-89. <a href="https://dx.doi.org/10.1590/1413-785220172503157788">https://dx.doi.org/10.1590/1413-785220172503157788</a> .                                                                                                                                                                                              |
| #2026 | Theroux 2017    | Theroux, Jean; Stomski, Norman; Innes, Stanley; Ballard, Ariane; Khadra, Christelle; Labelle, Hubert; Le May, Sylvie. Revisiting the psychometric properties of the Scoliosis Research Society-22 (SRS-22) French version. <i>Scoliosis and spinal disorders</i> , 2017, 12, 101675716, 21. <a href="https://dx.doi.org/10.1186/s13013-017-0129-8">https://dx.doi.org/10.1186/s13013-017-0129-8</a> .                                                                                                                                                                              |
| #2028 | Lee 2017        | Lee, Kyu Yeol; Kim, Min-Woo; Im, Chul Soon; Jung, Young Hoon. Radiologic and Clinical Courses of Degenerative Lumbar Scoliosis (10degree-25degree) after a Short-Segment Fusion. <i>Asian spine journal</i> , 2017, 11, 4, 570-579. <a href="https://dx.doi.org/10.4184/asj.2017.11.4.570">https://dx.doi.org/10.4184/asj.2017.11.4.570</a> .                                                                                                                                                                                                                                      |
| #2029 | Kato 2017       | Kato, Minori; Namikawa, Takashi; Matsumura, Akira; Konishi, Sadahiko; Nakamura, Hiroaki. Radiographic Risk Factors of Reoperation Following Minimally Invasive Decompression for Lumbar Canal Stenosis Associated With Degenerative Scoliosis and Spondylolisthesis. <i>Global spine journal</i> , 2017, 7, 6, 498-505. <a href="https://dx.doi.org/10.1177/2192568217699192">https://dx.doi.org/10.1177/2192568217699192</a> .                                                                                                                                                    |
| #2032 | Eastlack 2017   | Eastlack, Robert K; Mundis, Gregory M Jr; Wang, Michael; Mummaneni, Praveen V; Uribe, Juan; Okonkwo, David; Akbarnia, Behrooz A; Anand, Neel; Kanter, Adam; Park, Paul; Lafage, Virginie; Shaffrey, Christopher; Fessler, Richard; Deviren, Vedat; International Spine Study Group. Is There a Patient Profile That Characterizes a Patient With Adult Spinal Deformity as a Candidate for Minimally Invasive Surgery?. <i>Global spine journal</i> , 2017, 7, 7, 703-708. <a href="https://dx.doi.org/10.1177/2192568217716151">https://dx.doi.org/10.1177/2192568217716151</a> . |
| #2033 | Kwan 2017       | Kwan, Kenny Yat Hong; Cheng, Aldous C S; Koh, Hui Yu; Chiu, Alice Y Y; Cheung, Kenneth Man Chee. Effectiveness of Schroth exercises during bracing in adolescent idiopathic scoliosis: results from a preliminary study-SOSORT Award 2017 Winner. <i>Scoliosis and spinal disorders</i> , 2017, 12, 101675716, 32. <a href="https://dx.doi.org/10.1186/s13013-017-0139-6">https://dx.doi.org/10.1186/s13013-017-0139-6</a> .                                                                                                                                                       |
| #2037 | D'Agata 2017    | D'Agata, Elisabetta; Sanchez-Raya, Judith; Bago, Juan. Introversion, the prevalent trait of adolescents with idiopathic scoliosis: an observational study. <i>Scoliosis and spinal disorders</i> , 2017, 12, 101675716, 27. <a href="https://dx.doi.org/10.1186/s13013-017-0136-9">https://dx.doi.org/10.1186/s13013-017-0136-9</a> .                                                                                                                                                                                                                                              |

|       |                |                                                                                                                                                                                                                                                                                                                                                                                                                                                                                                                                                                                                                      |
|-------|----------------|----------------------------------------------------------------------------------------------------------------------------------------------------------------------------------------------------------------------------------------------------------------------------------------------------------------------------------------------------------------------------------------------------------------------------------------------------------------------------------------------------------------------------------------------------------------------------------------------------------------------|
| #2043 | Faraj 2017     | Faraj, Sayf S A; Haanstra, Tsjitske M; Martijn, Hugo; de Kleuver, Marinus; van Royen, Barend J. Functional outcome of non-surgical and surgical management for de novo degenerative lumbar scoliosis: a mean follow-up of 10 years. <i>Scoliosis and spinal disorders</i> , 2017, 12, 101675716, 35. <a href="https://dx.doi.org/10.1186/s13013-017-0143-x">https://dx.doi.org/10.1186/s13013-017-0143-x</a> .                                                                                                                                                                                                       |
| #2045 | Cheshire 2017  | Cheshire, James; Gardner, Adrian; Berryman, Fiona; Pynsent, Paul. Do the SRS-22 self-image and mental health domain scores reflect the degree of asymmetry of the back in adolescent idiopathic scoliosis?. <i>Scoliosis and spinal disorders</i> , 2017, 12, 101675716, 37. <a href="https://dx.doi.org/10.1186/s13013-017-0144-9">https://dx.doi.org/10.1186/s13013-017-0144-9</a> .                                                                                                                                                                                                                               |
| #2066 | Pratali 2018   | Pratali, Raphael de Rezende; Martins, Samuel Machado; Santos, Francisco Prado Eugenio Dos; Barsotti, Carlos Eduardo Goncales; Oliveira, Carlos Eduardo Algaves Soares de. The use of three-column osteotomy in the treatment of rigid deformities of the adult spine. <i>Revista brasileira de ortopedia</i> , 2018, 53, 2, 213-220. <a href="https://dx.doi.org/10.1016/j.rboe.2017.03.016">https://dx.doi.org/10.1016/j.rboe.2017.03.016</a> .                                                                                                                                                                     |
| #2101 | Nitikman 2017  | Nitikman, Michael; Mulpuri, Kishore; Reilly, Christopher W. Internet-administered Health-related Quality of Life Questionnaires Compared With Pen and Paper in an Adolescent Scoliosis Population: A Randomized Crossover Study. <i>Journal of pediatric orthopedics</i> , 2017, 37, 2, e75-e79. <a href="https://dx.doi.org/10.1097/BPO.0000000000000716">https://dx.doi.org/10.1097/BPO.0000000000000716</a> .                                                                                                                                                                                                     |
| #2104 | Schwieger 2017 | Schwieger, Traci; Campo, Shelly; Weinstein, Stuart L; Dolan, Lori A; Ashida, Sato; Steuber, Keli R. Body Image and Quality of Life and Brace Wear Adherence in Females With Adolescent Idiopathic Scoliosis. <i>Journal of pediatric orthopedics</i> , 2017, 37, 8, e519-e523. <a href="https://dx.doi.org/10.1097/BPO.0000000000000734">https://dx.doi.org/10.1097/BPO.0000000000000734</a> .                                                                                                                                                                                                                       |
| #2105 | Souder 2017    | Souder, Christopher; Newton, Peter O; Shah, Suken A; Lonner, Baron S; Bastrom, Tracey P; Yaszay, Burt. Factors in Surgical Decision Making for Thoracolumbar/Lumbar AIS: It's About More Than Just the Curve Magnitude. <i>Journal of pediatric orthopedics</i> , 2017, 37, 8, e530-e535. <a href="https://dx.doi.org/10.1097/BPO.0000000000000746">https://dx.doi.org/10.1097/BPO.0000000000000746</a> .                                                                                                                                                                                                            |
| #2114 | Paolucci 2017  | Paolucci, Teresa; Piccinini, Giulia; Iosa, Marco; Piermattei, Cristina; De Angelis, Simona; Zangrando, Federico; Saraceni, Vincenzo Maria. The importance of trunk perception during brace treatment in moderate juvenile idiopathic scoliosis: What is the impact on self-image?. <i>Journal of back and musculoskeletal rehabilitation</i> , 2017, 30, 2, 203-210. <a href="https://dx.doi.org/10.3233/BMR-160733">https://dx.doi.org/10.3233/BMR-160733</a> .                                                                                                                                                     |
| #2115 | Yoshida 2017   | Yoshida, Go; Boissiere, Louis; Larrieu, Daniel; Bourghli, Anouar; Vital, Jean Marc; Gille, Olivier; Pointillart, Vincent; Challier, Vincent; Mariey, Remi; Pellise, Ferran; Vila-Casademunt, Alba; Perez-Grueso, Francisco Javier Sanchez; Alanay, Ahmet; Acaroglu, Emre; Kleinstuck, Frank; Obeid, Ibrahim; ESSG, European Spine Study Group. Advantages and Disadvantages of Adult Spinal Deformity Surgery and Its Impact on Health-Related Quality of Life. <i>Spine</i> , 2017, 42, 6, 411-419. <a href="https://dx.doi.org/10.1097/BRS.0000000000001770">https://dx.doi.org/10.1097/BRS.0000000000001770</a> . |



- Nabiyev, Vugar; Ayhan, Selim; Yuksel, Selcen; Niyazi, Asli; Mmopelwa, Tiro; Domingo-Sabat, Montse; Vila-Casademunt, Alba; Pellise, Ferran; Alanay, Ahmet; Perez-Grueso, Francisco; Kleinstuck, Frank; Obeid, Ibrahim; Acaroglu, Emre; European Spine Study Group (ESSG). Does Surgery for Adult Spinal Deformity Affect the Cognitive Abilities in Patients over 50 Years of Age?. Turkish neurosurgery, 2017, 27, 5, 779-784. <https://dx.doi.org/10.5137/1019-5149.JTN.18285-16.1>.
- #2126 Nabiyev 2017
- Baknsnesian, Joshua; Schneer, Justin K; Gum, Jeffrey L; Hostin, Richard; Lafage, Virginie; Bess, Shay; Protosaltis, Themistocles S; Burton, Douglas C; Keefe, Malla Kate; Hart, Robert A; Mundis, Gregory M Jr; Shaffrey, Christopher I; Schwab, Frank; Smith, Justin S; Ames, Christopher P; International Spine Study Group. Impact of poor mental health in adult spinal deformity patients with poor physical function: a retrospective analysis with a 2-year follow-up. Journal of neurosurgery. Spine, 2017, 26, 1, 116-124. <https://dx.doi.org/10.3171/2016.5.SPINE151428>.
- #2130 Bakhsheshian 2017
- Gur, Gozde; Ayhan, Cigdem; Yakut, Yavuz. The effectiveness of core stabilization exercise in adolescent idiopathic scoliosis: A randomized controlled trial. Prosthetics and orthotics international, 2017, 41, 3, 303-310. <https://dx.doi.org/10.1177/0309364616664151>.
- #2133 Gur 2017
- Kim, Yong-Chan; Lenke, Lawrence G; Lee, Seon-Jong; Gum, Jeffrey L; Wilartatsami, Sirichai; Blanke, Kathy M. The cranial sagittal vertical axis (CrSVA) is a better radiographic measure to predict clinical outcomes in adult spinal deformity surgery than the C7 SVA: a monocentric study. European spine journal : official publication of the European Spine Society, the European Spinal Deformity Society, and the European Section of the Cervical Spine Research Society, 2017, 26, 8, 2167-2175. <https://dx.doi.org/10.1007/s00586-016-4757-0>.
- #2139 Kim 2017
- Hamilton, David Kojo; Kong, Christopher; Hirtzka, Jayme; Contag, Alec G; Ailon, Amir; Line, Breton; Daniels, Alan; Smith, Justin S; Passias, Peter; Protosaltis, Themistocles; Sciubba, Daniel; Burton, Douglas; Shaffrey, Christopher; Klineberg, Eric; Mundis, Gregory; Kim, Han-Jo; Lafage, Virginie; Lafage, Renaud; Scheer, Justin; Boachie-Adjei, Oheneba; Bess, Shay; Hart, Robert A. Patient Satisfaction After Adult Spinal Deformity Surgery Does Not Strongly Correlate With Health-Related Quality of Life Scores, Radiographic Parameters, or Occurrence of Complications. Spine, 2017, 42, 10, 764-769. <https://dx.doi.org/10.1097/BRS.0000000000001921>.
- #2140 Hamilton 2017
- Yagi, Mitsuru; Ohne, Hideaki; Konomi, Tsunehiko; Fujiyoshi, Kanehiro; Kaneko, Shinjiro; Takemitsu, Masakazu; Machida, Masafumi; Yato, Yoshiyuki; Asazuma, Takashi. Walking balance and compensatory gait mechanisms in surgically treated patients with adult spinal deformity. The spine journal : official journal of the North American Spine Society, 2017, 17, 3, 409-417. <https://dx.doi.org/10.1016/j.spinee.2016.10.014>.
- #2142 Yagi 2017
- Theologis, Alexander A; Mundis, Gregory M Jr; Nguyen, Stacie; Okonkwo, David O; Mummaneni, Praveen V; Smith, Justin S; Shaffrey, Christopher I; Fessler, Richard; Bess, Shay; Schwab, Frank; Diebo, Bassel G; Burton, Douglas; Hart, Robert; Deviren, Vedat; Ames, Christopher; for the International Spine Study Group. Utility of multilevel lateral interbody fusion of the thoracolumbar coronal curve apex in adult deformity surgery in combination with open posterior instrumentation and L5-S1 interbody fusion: a case-matched evaluation of 32 patients. Journal of neurosurgery. Spine, 2017, 26, 2, 208-219. <https://dx.doi.org/10.3171/2016.8.SPINE151543>.
- #2143 Theologis 2017
- Boissiere, Louis; Takemoto, Mitsuru; Bourghli, Anouar; Vital, Jean-Marc; Pellise, Ferran; Alanay, Ahmet; Yilgor, Caglar; Acaroglu, Emre; Perez-Grueso, Francisco Javier; Kleinstuck, Frank; Obeid, Ibrahim; European Spine Study Group (ESSG). Global tilt and lumbar lordosis index: two parameters correlating with health-related quality of life scores-but how do they truly impact disability?. The spine journal : official journal of the North American Spine Society, 2017, 17, 4, 480-488. <https://dx.doi.org/10.1016/j.spinee.2016.10.013>.
- #2149 Boissiere 2017

|       |                   |                                                                                                                                                                                                                                                                                                                                                                                                                                                                                                                                                                                                                                                                                                                                                                      |
|-------|-------------------|----------------------------------------------------------------------------------------------------------------------------------------------------------------------------------------------------------------------------------------------------------------------------------------------------------------------------------------------------------------------------------------------------------------------------------------------------------------------------------------------------------------------------------------------------------------------------------------------------------------------------------------------------------------------------------------------------------------------------------------------------------------------|
| #2152 | McKean 2017       | McKean, Greg M; Tsirikos, Athanasios I. Quality of life in children and adolescents undergoing spinal deformity surgery. Journal of back and musculoskeletal rehabilitation, 2017, 30, 2, 339-346. <a href="https://dx.doi.org/10.3233/BMR-160558">https://dx.doi.org/10.3233/BMR-160558</a> .                                                                                                                                                                                                                                                                                                                                                                                                                                                                       |
| #2153 | Colak 2017        | Colak, Tugba Kuru; Akgul, Turgut; Colak, Ilker; Dereli, Elif Elcin; Chodza, Mehmet; Dikici, Fatih. Health related quality of life and perception of deformity in patients with adolescent idiopathic scoliosis. Journal of back and musculoskeletal rehabilitation, 2017, 30, 3, 597-602. <a href="https://dx.doi.org/10.3233/BMR-160564">https://dx.doi.org/10.3233/BMR-160564</a> .                                                                                                                                                                                                                                                                                                                                                                                |
| #2155 | Takemoto 2017     | Takemoto, Mitsuru; Boissiere, Louis; Vital, Jean-Marie; Pelli, Ferran; Perez-Grueso, Francisco Javier Sanchez; Kleinstuck, Frank; Acaroglu, Emre R; Alanay, Ahmet; Obeid, Ibrahim. Are sagittal spinopelvic radiographic parameters significantly associated with quality of life of adult spinal deformity patients? Multivariate linear regression analyses for pre-operative and short-term post-operative health-related quality of life. European spine journal : official publication of the European Spine Society, the European Spinal Deformity Society, and the European Section of the Cervical Spine Research Society, 2017, 26, 8, 2176-2186. <a href="https://dx.doi.org/10.1007/s00586-016-4872-y">https://dx.doi.org/10.1007/s00586-016-4872-y</a> . |
| #2156 | Theroux 2017      | Theroux, Jean; Le May, Sylvie; Hebert, Jeffrey J; Labelle, Hubert. Back Pain Prevalence Is Associated With Curve-type and Severity in Adolescents With Idiopathic Scoliosis: A Cross-sectional Study. Spine, 2017, 42, 15, E914-E919. <a href="https://dx.doi.org/10.1097/BRS.0000000000001986">https://dx.doi.org/10.1097/BRS.0000000000001986</a> .                                                                                                                                                                                                                                                                                                                                                                                                                |
| #2157 | Bakhsheshian 2017 | Bakhsheshian, Joshua; Schneer, Justin K; Gum, Jeffrey L; Horner, Lance; Hostin, Richard; Larage, Virginie; Bess, Shay; Protosaitis, Themistocles S; Burton, Douglas C; Keefe, Malla; Hart, Robert A; Mundis, Gregory M; Shaffrey, Christopher I; Schwab, Frank; Smith, Justin S; Ames, Christopher P; International Spine Study Group (ISSG). Comparison of Structural Disease Burden to Health-related Quality of Life Scores in 264 Adult Spinal Deformity Patients With 2-Year Follow-up: Novel Insights into Drivers of Disability. Clinical spine surgery, 2017, 30, 2, E124-E131. <a href="https://dx.doi.org/10.1097/BSD.0000000000000470">https://dx.doi.org/10.1097/BSD.0000000000000470</a> .                                                              |
| #2162 | Wetterkamp 2017   | Wetterkamp, Mark; Thielsch, Meinold T; Gosheger, Georg; Boertz, Patrick; Terheyden, Jan Henrik; Schulte, Tobias L. German validation of the BIDQ-S questionnaire on body image disturbance in idiopathic scoliosis. European spine journal : official publication of the European Spine Society, the European Spinal Deformity Society, and the European Section of the Cervical Spine Research Society, 2017, 26, 2, 309-315. <a href="https://dx.doi.org/10.1007/s00586-016-4895-4">https://dx.doi.org/10.1007/s00586-016-4895-4</a> .                                                                                                                                                                                                                             |
| #2165 | Zapata 2017       | Zapata, Karina A; Wang-Price, Sharon S; Sucato, Daniel J. Six-Month Follow-up of Supervised Spinal Stabilization Exercises for Low Back Pain in Adolescent Idiopathic Scoliosis. Pediatric physical therapy : the official publication of the Section on Pediatrics of the American Physical Therapy Association, 2017, 29, 1, 62-66. .                                                                                                                                                                                                                                                                                                                                                                                                                              |
| #2186 | Kondo 2017        | Kondo, Ryo; Yamato, Yu; Nagafusa, Tetsuyuki; Mizushima, Takashi; Hasegawa, Tomohiko; Kobayashi, Sho; Togawa, Daisuke; Oe, Shin; Kurosu, Kenta; Matsuyama, Yukihiro. Effect of corrective long spinal fusion to the ilium on physical function in patients with adult spinal deformity. European spine journal : official publication of the European Spine Society, the European Spinal Deformity Society, and the European Section of the Cervical Spine Research Society, 2017, 26, 8, 2138-2145. <a href="https://dx.doi.org/10.1007/s00586-017-4987-9">https://dx.doi.org/10.1007/s00586-017-4987-9</a> .                                                                                                                                                        |

|       |                   |                                                                                                                                                                                                                                                                                                                                                                                                                                                                                                                                                                                                                                                                                                                                                                  |
|-------|-------------------|------------------------------------------------------------------------------------------------------------------------------------------------------------------------------------------------------------------------------------------------------------------------------------------------------------------------------------------------------------------------------------------------------------------------------------------------------------------------------------------------------------------------------------------------------------------------------------------------------------------------------------------------------------------------------------------------------------------------------------------------------------------|
| #2199 | Jain 2017         | Jain, Amit; Kebaish, Khaled M; Sciubba, Daniel M; Hassanzadeh, Hamid; Scheer, Justin K; Neuman, Brian J; Lafage, Virginie; Bess, Shay; Protopsaltis, Themistocles S; Burton, Douglas C; Smith, Justin S; Shaffrey, Christopher I; Hostin, Richard A; Ames, Christopher P; International Spine Study Group. Early Patient-Reported Outcomes Predict 3-Year Outcomes in Operatively Treated Patients with Adult Spinal Deformity. <i>World neurosurgery</i> , 2017, 102, 101528275, 258-262. <a href="https://dx.doi.org/10.1016/j.wneu.2017.03.003">https://dx.doi.org/10.1016/j.wneu.2017.03.003</a> .                                                                                                                                                           |
| #2202 | Voepel-Lewis 2017 | Voepel-Lewis, Terri; Caird, Michelle S; Tait, Alan R; Malviya, Shobha; Farley, Frances A; Li, Ying; Abbott, Matthew D; van Veen, Tara; Hassett, Afton L; Clauw, Daniel J. A High Preoperative Pain and Symptom Profile Predicts Worse Pain Outcomes for Children After Spine Fusion Surgery. <i>Anesthesia and analgesia</i> , 2017, 124, 5, 1594-1602. <a href="https://dx.doi.org/10.1213/ANE.0000000000001963">https://dx.doi.org/10.1213/ANE.0000000000001963</a> .                                                                                                                                                                                                                                                                                          |
| #2204 | Atici 2017        | Atici, Yunus; Aydin, Canan Gonen; Atici, Aysegul; Buyukkuscu, Mehmet Ozbey; Arikan, Yavuz; Balioglu, Mehmet Bulent. The effect of Kinesio taping on back pain in patients with Lenke Type 1 adolescent idiopathic scoliosis: A randomized controlled trial. <i>Acta orthopaedica et traumatologica turcica</i> , 2017, 51, 3, 191-196. <a href="https://dx.doi.org/10.1016/j.aott.2017.01.002">https://dx.doi.org/10.1016/j.aott.2017.01.002</a> .                                                                                                                                                                                                                                                                                                               |
| #2206 | Passias 2017      | Passias, Peter G; Poorman, Gregory W; Jalai, Cyrus M; Line, Breton; Diebo, Bassel; Park, Paul; Hart, Robert; Burton, Douglas; Schwab, Frank; Lafage, Virginie; Bess, Shay; Errico, Thomas; International Spine Study Group. Outcomes of open staged corrective surgery in the setting of adult spinal deformity. <i>The spine journal : official journal of the North American Spine Society</i> , 2017, 17, 8, 1091-1099. <a href="https://dx.doi.org/10.1016/j.spinee.2017.03.012">https://dx.doi.org/10.1016/j.spinee.2017.03.012</a> .                                                                                                                                                                                                                       |
| #2208 | Kang 2017         | Kang, Daniel G; Baldus, Christine; Glassman, Steven D; Shaffrey, Christopher I; Lurie, Jon D; Bridwell, Keith H. Neurologic Deficits Have a Negative Impact on Patient-Related Outcomes in Primary Presentation Adult Symptomatic Lumbar Scoliosis Surgical Treatment at One-Year Follow-up. <i>Spine</i> , 2017, 42, 7, 479-489. <a href="https://dx.doi.org/10.1097/BRS.0000000000001800">https://dx.doi.org/10.1097/BRS.0000000000001800</a> .                                                                                                                                                                                                                                                                                                                |
| #2210 | Bourghli 2017     | Bourghli, Anouar; Boissiere, Louis; Larrieu, Daniel; Vital, Jean-Marc; Tligor, Caglar; Pellise, Ferran; Alanay, Ahmet; Acaroglu, Emre; Perez-Grueso, Francisco-Javier; Kleinstuck, Franck; Obeid, Ibrahim; European Spine Study Group. Lack of improvement in health-related quality of life (HRQOL) scores 6 months after surgery for adult spinal deformity (ASD) predicts high revision rate in the second postoperative year. <i>European spine journal : official publication of the European Spine Society, the European Spinal Deformity Society, and the European Section of the Cervical Spine Research Society</i> , 2017, 26, 8, 2160-2166. <a href="https://dx.doi.org/10.1007/s00586-017-5068-9">https://dx.doi.org/10.1007/s00586-017-5068-9</a> . |
| #2222 | Lee 2017          | Lee, Jung Sub; Shin, Jong Ki; Goh, Tae Sik; Son, Seung Min; An, Sung Jin. Validation of the Korean version of the Spinal Appearance Questionnaire. <i>Journal of back and musculoskeletal rehabilitation</i> , 2017, 30, 6, 1203-1208. <a href="https://dx.doi.org/10.3233/BMR-150480">https://dx.doi.org/10.3233/BMR-150480</a> .                                                                                                                                                                                                                                                                                                                                                                                                                               |
| #2235 | Tsirikos 2017     | Tsirikos, A I; Mataliotakis, G; Bounakis, N. Posterior spinal fusion for adolescent idiopathic scoliosis using a convex pedicle screw technique: a novel concept of deformity correction. <i>The bone &amp; joint journal</i> , 2017, 99-B, 8, 1080-1087. <a href="https://dx.doi.org/10.1302/0301-620X.99B8.BJJ-2016-1351.R1">https://dx.doi.org/10.1302/0301-620X.99B8.BJJ-2016-1351.R1</a> .                                                                                                                                                                                                                                                                                                                                                                  |

|       |                |                                                                                                                                                                                                                                                                                                                                                                                                                                                                                                                                                                                                                                                                                                             |
|-------|----------------|-------------------------------------------------------------------------------------------------------------------------------------------------------------------------------------------------------------------------------------------------------------------------------------------------------------------------------------------------------------------------------------------------------------------------------------------------------------------------------------------------------------------------------------------------------------------------------------------------------------------------------------------------------------------------------------------------------------|
| #2238 | Ward 2017      | Ward, W Timothy; Friel, Nicole A; Kenkre, Tanya S; Brooks, Maria M; Londino, Joanne A; Roach, James W. SRS-22r Scores in Nonoperated Adolescent Idiopathic Scoliosis Patients With Curves Greater Than Forty Degrees. <i>Spine</i> , 2017, 42, 16, 1233-1240. <a href="https://dx.doi.org/10.1097/BRS.0000000000002004">https://dx.doi.org/10.1097/BRS.0000000000002004</a> .                                                                                                                                                                                                                                                                                                                               |
| #2239 | Liu 2017       | Liu, Gang; Liu, Sen; Zuo, Yu-Zhi; Li, Qi-Yi; Wu, Zhi-Hong; Wu, Nan; Yu, Ke-Yi; Qiu, Gui-Xing. Recent Advances in Technique and Clinical Outcomes of Minimally Invasive Spine Surgery in Adult Scoliosis. <i>Chinese medical journal</i> , 2017, 130, 21, 2608-2615. <a href="https://dx.doi.org/10.4103/0366-6999.212688">https://dx.doi.org/10.4103/0366-6999.212688</a> .                                                                                                                                                                                                                                                                                                                                 |
| #2263 | Bumpass 2017   | Bumpass, David B; Lenke, Lawrence G; Gum, Jeffrey L; Shattrey, Christopher I; Smith, Justin S; Ames, Christopher P; Bess, Shay; Neuman, Brian J; Klineberg, Eric; Mundis, Gregory M Jr; Schwab, Frank; Lafage, Virginie; Kim, Han Jo; Burton, Douglas C; Kebaish, Khaled M; Hostin, Richard; Lafage, Renaud; Kelly, Michael P; International Spine Study Group. Male sex may not be associated with worse outcomes in primary all-posterior adult spinal deformity surgery: a multicenter analysis. <i>Neurosurgical focus</i> , 2017, 43, 6, E9. <a href="https://dx.doi.org/10.3171/2017.9.FOCUS17475">https://dx.doi.org/10.3171/2017.9.FOCUS17475</a> .                                                 |
| #2264 | Than 2017      | Than, Khoi D; Mummaneni, Praveen V; Bridges, Kelly J; Tran, Stacie; Park, Paul; Chou, Dean; La Marca, Frank; Uribe, Juan S; Vogel, Todd D; Nunley, Pierce D; Eastlack, Robert K; Anand, Neel; Okonkwo, David O; Kanter, Adam S; Mundis, Gregory M Jr. Complication rates associated with open versus percutaneous pedicle screw instrumentation among patients undergoing minimally invasive interbody fusion for adult spinal deformity. <i>Neurosurgical focus</i> , 2017, 43, 6, E7. <a href="https://dx.doi.org/10.3171/2017.8.FOCUS17479">https://dx.doi.org/10.3171/2017.8.FOCUS17479</a> .                                                                                                           |
| #2268 | Misterska 2017 | Misterska, Ewa; Glowacki, Jakub; Okret, Adam; Laurentowska, Maria; Glowacki, Maciej. Back and neck pain and function in females with adolescent idiopathic scoliosis: A follow-up at least 23 years after conservative treatment with a Milwaukee brace. <i>PloS one</i> , 2017, 12, 12, e0189358. <a href="https://dx.doi.org/10.1371/journal.pone.0189358">https://dx.doi.org/10.1371/journal.pone.0189358</a> .                                                                                                                                                                                                                                                                                          |
| #2273 | Gur 2018       | Gur, Gozde; Yakut, Yavuz; Grivas, Theo. The Turkish version of the Brace Questionnaire in brace-treated adolescents with idiopathic scoliosis. <i>Prosthetics and orthotics international</i> , 2018, 42, 2, 129-135. <a href="https://dx.doi.org/10.1177/0309364617690393">https://dx.doi.org/10.1177/0309364617690393</a> .                                                                                                                                                                                                                                                                                                                                                                               |
| #2279 | Passias 2018   | Passias, Peter G; Jalai, Cyrus M; Line, Breton G; Poorman, Gregory W; Scheer, Justin K; Smith, Justin S; Shattrey, Christopher I; Burton, Douglas C; Fu, Kai-Ming G; Klineberg, Eric O; Hart, Robert A; Schwab, Frank; Lafage, Virginie; Bess, Shay; International Spine Study Group. Patient profiling can identify patients with adult spinal deformity (ASD) at risk for conversion from nonoperative to surgical treatment: initial steps to reduce ineffective ASD management. <i>The spine journal : official journal of the North American Spine Society</i> , 2018, 18, 2, 234-244. <a href="https://dx.doi.org/10.1016/j.spinee.2017.06.044">https://dx.doi.org/10.1016/j.spinee.2017.06.044</a> . |
| #2280 | Lonner 2018    | Lonner, Baron S; Ren, Yuan; Yaszay, Burt; Cahill, Patrick J; Shah, Suken A; Betz, Randal R; Samdani, Amer F; Shufflebarger, Harry L; Newton, Peter O. Evolution of Surgery for Adolescent Idiopathic Scoliosis Over 20 Years: Have Outcomes Improved?. <i>Spine</i> , 2018, 43, 6, 402-410. <a href="https://dx.doi.org/10.1097/BRS.0000000000002332">https://dx.doi.org/10.1097/BRS.0000000000002332</a> .                                                                                                                                                                                                                                                                                                 |

|       |                      |                                                                                                                                                                                                                                                                                                                                                                                                                                                                                                       |
|-------|----------------------|-------------------------------------------------------------------------------------------------------------------------------------------------------------------------------------------------------------------------------------------------------------------------------------------------------------------------------------------------------------------------------------------------------------------------------------------------------------------------------------------------------|
| #2289 | RezaeiMotlagh 2018   | Rezaei Motlagh, Fazel; Kamali, Mohammad; Babaee, Taher. Persian adaptation of Quality of Life Profile for Spinal Deformities questionnaire. Journal of back and musculoskeletal rehabilitation, 2018, 31, 1, 177-182. <a href="https://dx.doi.org/10.3233/BMR-169775">https://dx.doi.org/10.3233/BMR-169775</a> .                                                                                                                                                                                     |
| #2290 | Moke 2018            | Moke, Lieven; Severijns, Pieter; Schelfaut, Sebastiaan; Van de Loock, Kristel; Hermans, Lore; Molenaers, Guy; Jonkers, Ilse; Scheys, Lennart. Performance on Balance Evaluation Systems Test (BESTest) Impacts Health-Related Quality of Life in Adult Spinal Deformity Patients. Spine, 2018, 43, 9, 637-646. <a href="https://dx.doi.org/10.1097/BRS.0000000000002390">https://dx.doi.org/10.1097/BRS.0000000000002390</a> .                                                                        |
| #2292 | Zheng 2018           | Zheng, Yu; Dang, Yini; Yang, Yan; Li, Huabo; Zhang, Lijie; Lou, Edmond H M; He, Chengqi; Wong, Mansang. Whether Orthotic Management and Exercise are Equally Effective to the Patients With Adolescent Idiopathic Scoliosis in Mainland China?: A Randomized Controlled Trial Study. Spine, 2018, 43, 9, E494-E503. <a href="https://dx.doi.org/10.1097/BRS.0000000000002412">https://dx.doi.org/10.1097/BRS.0000000000002412</a> .                                                                   |
| #2298 | Lin 2018             | Lin, Tao; Meng, Yichen; Li, Tangbo; Jiang, Heng; Gao, Rui; Zhou, Xuhui. Predictors of Postoperative Recovery Based on Health-Related Quality of Life in Patients after Degenerative Lumbar Scoliosis Surgery. World neurosurgery, 2018, 109, 101528275, e539-e545. <a href="https://dx.doi.org/10.1016/j.wneu.2017.10.015">https://dx.doi.org/10.1016/j.wneu.2017.10.015</a> .                                                                                                                        |
| #2301 | Martin-Buitrago 2018 | Martin-Buitrago, Mar Perez; Pizones, Javier; Sanchez Perez-Grueso, Francisco Javier; Diaz Almiron, Mariana; Vila-Casademunt, Alba; Obeid, Ibrahim; Alanay, Ahmet; Kleinstuck, Frank; Acaroglu, Emre R; Pellise, Ferran; ESSG European Spine Study Group. Impact of Iliac Instrumentation on the Quality of Life of Patients With Adult Spine Deformity. Spine, 2018, 43, 13, 913-918. <a href="https://dx.doi.org/10.1097/BRS.0000000000002476">https://dx.doi.org/10.1097/BRS.0000000000002476</a> . |
| #2304 | Alanazi 2018         | Alanazi, Malik H; Parent, Eric C; Dennett, Elizabeth. Effect of stabilization exercise on back pain, disability and quality of life in adults with scoliosis: a systematic review. European journal of physical and rehabilitation medicine, 2018, 54, 5, 647-653. <a href="https://dx.doi.org/10.23736/S1973-9087.17.05062-6">https://dx.doi.org/10.23736/S1973-9087.17.05062-6</a> .                                                                                                                |
| #2305 | Ng 2015              | Ng, Bobby Kin Wah; Chau, Wai-Wang; Hui, Chak-Na; Cheng, Po-Yin; Wong, Chau-Yuet; Wang, Bin; Cheng, Jack Chun Yiu; Lam, Tsz Ping. HRQoL assessment by SRS-30 for Chinese patients with surgery for Adolescent Idiopathic Scoliosis (AIS). Scoliosis, 2015, 10, Suppl 2, S19. <a href="https://dx.doi.org/10.1186/1748-7161-10-S2-S19">https://dx.doi.org/10.1186/1748-7161-10-S2-S19</a> .                                                                                                             |
| #2323 | Makino 2015          | Makino, Takahiro; Kaito, Takashi; Kashii, Masafumi; Iwasaki, Motoki; Yoshikawa, Hideki. Low back pain and patient-reported QOL outcomes in patients with adolescent idiopathic scoliosis without corrective surgery. SpringerPlus, 2015, 4, 101597967, 397. <a href="https://dx.doi.org/10.1186/s40064-015-1189-y">https://dx.doi.org/10.1186/s40064-015-1189-y</a> .                                                                                                                                 |

- #2331 Schreiber 2015 Schreiber, Sanja; Parent, Eric C; Moez, Elham Khodayari; Hedden, Douglas M; Hill, Doug; Moreau, Marc J; Lou, Edmond; Watkins, Elise M; Southon, Sarah C. The effect of Schroth exercises added to the standard of care on the quality of life and muscle endurance in adolescents with idiopathic scoliosis-an assessor and statistician blinded randomized controlled trial: "SOSORT 2015 Award Winner". *Scoliosis*, 2015, 10, 101271527, 24. <https://dx.doi.org/10.1186/s13013-015-0048-5>.
- #2337 Rodrigues 2015 Rodrigues, Joao Bernardo Sancio Rocha; Saleme, Nathalia Ambrozim Santos; Batista, Jose Lucas Jr; Cardoso, Igor Machado; Jacob, Charbel Jr. Quality of life in patients submitted to surgical treatment of idiopathic scoliosis. *Acta ortopedica brasileira*, 2015, 23, 6, 287-9. <https://dx.doi.org/10.1590/1413-785220152306115026>.
- #2341 Uehara 2018 Uehara, Masashi; Takahashi, Jun; Ikegami, Shota; Kuraishi, Shugo; Futatsugi, Toshimasa; Oba, Hiroki; Koseki, Michihiko; Kato, Hiroyuki. Mid-term results of computer-assisted skip pedicle screw fixation for patients with Lenke type 1 and 2 adolescent idiopathic scoliosis: A minimum five-year follow-up study. *Journal of orthopaedic science : official journal of the Japanese Orthopaedic Association*, 2018, 23, 2, 248-252. <https://dx.doi.org/10.1016/j.jos.2017.11.011>.
- #2343 Kelly 2018 Kelly, Michael P; Kim, Han Jo; Ames, Christopher P; Burton, Douglas C; Carreon, Leon Yacat; Polly, David W Jr; Hostin, Richard; Jain, Amit; Gum, Jeffrey L; Lafage, Virginie; Schwab, Frank J; Shaffrey, Christopher I; Smith, Justin S; Bess, Shay; International Spine Study Group. Minimum Detectable Measurement Difference for Health-Related Quality of Life Measures Varies With Age and Disability in Adult Spinal Deformity: Implications for Calculating Minimal Clinically Important Difference. *Spine*, 2018, 43, 13, E790-E795. <https://dx.doi.org/10.1097/BRS.0000000000002519>.
- #2353 Reid 2018 Reid, Daniel B C; Daniels, Alan H; Ailon, Tamir; Miller, Emily; Sciubba, Daniel M; Smith, Justin S; Shaffrey, Christopher I; Schwab, Frank; Burton, Douglas; Hart, Robert A; Hostin, Richard; Line, Breton; Bess, Shay; Ames, Christopher P; International Spine Study Group. Frailty and Health-Related Quality of Life Improvement Following Adult Spinal Deformity Surgery. *World neurosurgery*, 2018, 112, 101528275, e548-e554. <https://dx.doi.org/10.1016/j.wneu.2018.01.079>.
- #2361 Misterska 2018 Misterska, Ewa; Glowacki, Jakub; Glowacki, Maciej; Okret, Adam. Long-term effects of conservative treatment of Milwaukee brace on body image and mental health of patients with idiopathic scoliosis. *PloS one*, 2018, 13, 2, e0193447. <https://dx.doi.org/10.1371/journal.pone.0193447>.
- #2364 Mmopelwa 2018 Mmopelwa, Tiro; Ayhan, Selim; Yuksel, Selcen; Nabyev, Vugar; Niyazi, Asli; Pellise, Ferran; Alanay, Ahmet; Sanchez Perez Grueso, Francisco Javier; Kleinstuck, Frank; Obeid, Ibrahim; Acaroglu, Emre; European Spine Study Group (ESSG). Analysis of factors affecting baseline SF-36 Mental Component Summary in Adult Spinal Deformity and its impact on surgical outcomes. *Acta orthopaedica et traumatologica turcica*, 2018, 52, 3, 179-184. <https://dx.doi.org/10.1016/j.aott.2018.02.001>.
- #2365 Hu 2018 Hu, Zongshan; Zhao, Zhihui; Li, Jie; Tseng, Chang-Chun; Qiu, Yong; Cheng, Jack Chun-Yiu; Zhu, Zezhang; Liu, Zhen. Comparison of Clinical and Radiologic Outcome of Three-Dimensional Correction in Lenke 5C Curve: Uniplanar Versus Polyaxial Pedicle Screws. *World neurosurgery*, 2018, 114, 101528275, e729-e734. <https://dx.doi.org/10.1016/j.wneu.2018.03.067>.

|       |                   |                                                                                                                                                                                                                                                                                                                                                                                                                                                                                                                                                                                                                                                                                                                           |
|-------|-------------------|---------------------------------------------------------------------------------------------------------------------------------------------------------------------------------------------------------------------------------------------------------------------------------------------------------------------------------------------------------------------------------------------------------------------------------------------------------------------------------------------------------------------------------------------------------------------------------------------------------------------------------------------------------------------------------------------------------------------------|
| #2370 | Zhao 2018         | Zhao, Yongfei; Liang, Yan; Mao, Keya. Radiographic and clinical outcomes following MIS-TLIF in patients with adult lumbar degenerative scoliosis. <i>Journal of orthopaedic surgery and research</i> , 2018, 13, 1, 93. <a href="https://dx.doi.org/10.1186/s13018-018-0764-7">https://dx.doi.org/10.1186/s13018-018-0764-7</a> .                                                                                                                                                                                                                                                                                                                                                                                         |
| #2374 | Ailon 2018        | Ailon, Amir; Smith, Justin S; Snarr, Christopher I; Soroceanu, Alex; Larage, Virginie; Schwab, Frank; Burton, Douglas; Hart, Robert; Kim, Han Jo; Gum, Jeffrey; Hostin, Richard; Kelly, Michael P; Glassman, Steven; Scheer, Justin K; Bess, Shay; Ames, Christopher P; International Spine Study Group. Patients with Adult Spinal Deformity with Previous Fusions Have an Equal Chance of Reaching Substantial Clinical Benefit Thresholds in Health-Related Quality of Life Measures but Do Not Reach the Same Absolute Level of Improvement. <i>World neurosurgery</i> , 2018, 116, 101528275, e354-e361. <a href="https://dx.doi.org/10.1016/j.wneu.2018.04.204">https://dx.doi.org/10.1016/j.wneu.2018.04.204</a> . |
| #2380 | RappvanRoden 2018 | Rapp van Roden, Elizabeth A; Richardson, Robert Tyler; Russo, Stephanie A; Rose, William C; Chafetz, Ross S; Gabos, Peter G; Shah, Suken A; Samdani, Amer F; Richards, James G. Shoulder Complex Mechanics in Adolescent Idiopathic Scoliosis and Their Relation to Patient-perceived Function. <i>Journal of pediatric orthopedics</i> , 2018, 38, 8, e446-e454. <a href="https://dx.doi.org/10.1097/BPO.0000000000001207">https://dx.doi.org/10.1097/BPO.0000000000001207</a> .                                                                                                                                                                                                                                         |
| #2381 | Zimon 2018        | Zimon, Michalina; Matusik, Edyta; Kapustka, Bartosz; Durmala, Jacek; Doroniewicz, Iwona; Wnuk, Bartosz. Conservative management strategies and stress level in children and adolescents with idiopathic scoliosis. <i>Psychiatria polska</i> , 2018, 52, 2, 355-369. <a href="https://dx.doi.org/10.12740/PP/OnlineFirst/68744">https://dx.doi.org/10.12740/PP/OnlineFirst/68744</a> .                                                                                                                                                                                                                                                                                                                                    |
| #2401 | Matamalas 2014    | Matamalas, Antonia; Bago, Joan; D'Agata, Elisabetta; Pellise, Ferran. Body image in idiopathic scoliosis: a comparison study of psychometric properties between four patient-reported outcome instruments. <i>Health and quality of life outcomes</i> , 2014, 12, 101153626, 81. <a href="https://dx.doi.org/10.1186/1477-7525-12-81">https://dx.doi.org/10.1186/1477-7525-12-81</a> .                                                                                                                                                                                                                                                                                                                                    |
| #2406 | Fu 2016           | Fu, Xin; Sun, Xiao-Lei; Harris, Jonathan A; Sheng, Sun-Ren; Xu, Hua-Zi; Chi, Yong-Long; Wu, Ai-Min. Long fusion correction of degenerative adult spinal deformity and the selection of the upper or lower thoracic region as the site of proximal instrumentation: a systematic review and meta-analysis. <i>BMJ open</i> , 2016, 6, 11, e012103. <a href="https://dx.doi.org/10.1136/bmjopen-2016-012103">https://dx.doi.org/10.1136/bmjopen-2016-012103</a> .                                                                                                                                                                                                                                                           |
| #2408 | Hedayati 2018     | Hedayati, Zahra; Ahmadi, Amir; Kamyab, Mojtaba; Babaee, Taher; Ganjavian, Mohammad Saleh. Effect of Group Exercising and Adjusting the Brace at Shorter Intervals on Cobb Angle and Quality of Life of Patients With Idiopathic Scoliosis. <i>American journal of physical medicine &amp; rehabilitation</i> , 2018, 97, 2, 104-109. <a href="https://dx.doi.org/10.1097/PHM.0000000000000812">https://dx.doi.org/10.1097/PHM.0000000000000812</a> .                                                                                                                                                                                                                                                                      |
| #2422 | Toombs 2018       | Toombs, Courtney; Lonner, Baron; Shah, Suken; Samdani, Amer; Cahill, Patrick; Shufflebarger, Harry; Yaszay, Burt; Sponseller, Paul; Newton, Peter. Quality of Life Improvement Following Surgery in Adolescent Spinal Deformity Patients: A Comparison Between Scheuermann Kyphosis and Adolescent Idiopathic Scoliosis. <i>Spine deformity</i> , 2018, 6, 6, 676-683. <a href="https://dx.doi.org/10.1016/j.jspd.2018.04.009">https://dx.doi.org/10.1016/j.jspd.2018.04.009</a> .                                                                                                                                                                                                                                        |

|       |                |                                                                                                                                                                                                                                                                                                                                                                                                                                                                                                                                                                                                                                                                                                       |
|-------|----------------|-------------------------------------------------------------------------------------------------------------------------------------------------------------------------------------------------------------------------------------------------------------------------------------------------------------------------------------------------------------------------------------------------------------------------------------------------------------------------------------------------------------------------------------------------------------------------------------------------------------------------------------------------------------------------------------------------------|
| #2437 | Swierkosz 2015 | Swierkosz, Szymon; Nowak, Zbigniew. Low back pain in adolescents. An assessment of the quality of life in terms of qualitative and quantitative pain variables. Journal of back and musculoskeletal rehabilitation, 2015, 28, 1, 25-34. .                                                                                                                                                                                                                                                                                                                                                                                                                                                             |
| #2439 | Theis 2015     | Theis, Jennifer; Gerdhem, Paul; Abbott, Allan. Quality of life outcomes in surgically treated adult scoliosis patients: a systematic review. European spine journal : official publication of the European Spine Society, the European Spinal Deformity Society, and the European Section of the Cervical Spine Research Society, 2015, 24, 7, 1343-55. <a href="https://dx.doi.org/10.1007/s00586-014-3593-3">https://dx.doi.org/10.1007/s00586-014-3593-3</a> .                                                                                                                                                                                                                                     |
| #2446 | Smith 2016     | Smith, Justin S; Larage, virginie; Shattrey, Christopher I; Schwab, Frank; Larage, Renaud; Hostin, Richard; O'Brien, Michael; Boachie-Adjei, Oheneba; Akbarnia, Behrooz A; Mundis, Gregory M; Errico, Thomas; Kim, Han Jo; Protosaltis, Themistocles S; Hamilton, D Kojo; Scheer, Justin K; Sciubba, Daniel; Ailon, Tamir; Fu, Kai-Ming G; Kelly, Michael P; Zebala, Lukas; Line, Breton; Klineberg, Eric; Gupta, Munish; Deviren, Vedat; Hart, Robert; Burton, Doug; Bess, Shay; Ames, Christopher P; International Spine Study Group. Outcomes of Operative and Nonoperative Treatment for Adult Spinal Deformity: A Prospective, Multicenter, Propensity-Matched Cohort Assessment With Minimum 2- |
| #2448 | Ames 2016      | Ames, Christopher; Gammal, Isaac; Matsumoto, Morio; Hosogane, Naobumi; Smith, Justin S; Protosaltis, Themistocles; Yamato, Yu; Matsuyama, Yukihiro; Taneichi, Hiroshi; Lafage, Renaud; Ferrero, Emmanuelle; Schwab, Frank J; Lafage, Virginie. Geographic and Ethnic Variations in Radiographic Disability Thresholds: Analysis of North American and Japanese Operative Adult Spinal Deformity Populations. Neurosurgery, 2016, 78, 6, 793-801. <a href="https://dx.doi.org/10.1227/NEU.0000000000001184">https://dx.doi.org/10.1227/NEU.0000000000001184</a> .                                                                                                                                      |
| #2452 | Simony 2016    | Simony, Ane; Carreon, Leah Y; Andersen, Mikkel O. Reliability and Validity Testing of a Danish Translated Version of the Scoliosis Research Society Instrument-22 Revised (SRS-22R). Spine deformity, 2016, 4, 1, 16-21. <a href="https://dx.doi.org/10.1016/j.jspd.2015.06.006">https://dx.doi.org/10.1016/j.jspd.2015.06.006</a> .                                                                                                                                                                                                                                                                                                                                                                  |
| #2496 | Cochran 1985   | Cochran, T; Nachemson, A. Long-term anatomic and functional changes in patients with adolescent idiopathic scoliosis treated with the Milwaukee brace. Spine, 1985, 10, 2, 127-33. .                                                                                                                                                                                                                                                                                                                                                                                                                                                                                                                  |
| #2511 | Mayo 1994      | Mayo, N E; Goldberg, M S; Poitras, B; Scott, S; Hanley, J. The Ste-Justine Adolescent Idiopathic Scoliosis Cohort Study. Part III: Back pain. Spine, 1994, 19, 14, 1573-81. .                                                                                                                                                                                                                                                                                                                                                                                                                                                                                                                         |
| #2517 | Albert 1995    | Albert, T J; Purtill, J; Mesa, J; McIntosh, T; Balderston, R A. Health outcome assessment before and after adult deformity surgery. A prospective study. Spine, 1995, 20, 18, 2002-p2005. .                                                                                                                                                                                                                                                                                                                                                                                                                                                                                                           |



|       |                   |                                                                                                                                                                                                                                                                                                                                                                                                                                                                                                                                                                                                 |
|-------|-------------------|-------------------------------------------------------------------------------------------------------------------------------------------------------------------------------------------------------------------------------------------------------------------------------------------------------------------------------------------------------------------------------------------------------------------------------------------------------------------------------------------------------------------------------------------------------------------------------------------------|
| #2530 | Payne 1997        | Payne, W K 3rd; Ogilvie, J W; Resnick, M D; Kane, R L; Transfeldt, E E; Blum, R W. Does scoliosis have a psychological impact and does gender make a difference?. Spine, 1997, 22, 12, 1380-4. .                                                                                                                                                                                                                                                                                                                                                                                                |
| #2562 | McDowell 2017     | McDowell, Michael M; Tempel, Zachary J; Gandhoke, Gurpreet S; Khattar, Nicholas K; Hamilton, D Kojo; Kanter, Adam S; Okonkwo, David O. Evolution of Sagittal Imbalance Following Corrective Surgery for Sagittal Plane Deformity. Neurosurgery, 2017, 81, 1, 129-134. <a href="https://dx.doi.org/10.1093/neuros/nyx145">https://dx.doi.org/10.1093/neuros/nyx145</a> .                                                                                                                                                                                                                         |
| #2568 | Farrokhi 2017     | Farrokhi, Majid Reza; Jamali, Mohammad; Gholami, Mehrnaz; Farrokhi, Farnaz; Hosseini, Khadijeh. Clinical and radiological outcomes after decompression and posterior fusion in patients with degenerative scoliosis. British journal of neurosurgery, 2017, 31, 5, 514-525. <a href="https://dx.doi.org/10.1080/02688697.2017.1317717">https://dx.doi.org/10.1080/02688697.2017.1317717</a> .                                                                                                                                                                                                   |
| #2595 | Monticone 2017    | Monticone, Marco; Ambrosini, Emilia; Rocca, Barbara; Foti, Calogero; Ferrante, Simona. Responsiveness and Minimal Important Changes of the Scoliosis Research Society-22 Patient Questionnaire in Subjects With Mild Adolescent and Moderate Adult Idiopathic Scoliosis Undergoing Multidisciplinary Rehabilitation. Spine, 2017, 42, 11, E672-E679. <a href="https://dx.doi.org/10.1097/BRS.0000000000001923">https://dx.doi.org/10.1097/BRS.0000000000001923</a> .                                                                                                                            |
| #2596 | Scaramuzzo 2017   | Scaramuzzo, Laura; Giudici, Fabrizio; Bongetta, Daniele; Caboni, Eleonora; Minoia, Leone; Zagra, Antonino. Thoraco-lumbar selective fusion in adolescent idiopathic scoliosis with Lenke C modifier curves: clinical and radiographic analysis at 10-year follow-up. European spine journal : official publication of the European Spine Society, the European Spinal Deformity Society, and the European Section of the Cervical Spine Research Society, 2017, 26, Suppl 4, 514-523. <a href="https://dx.doi.org/10.1007/s00586-017-5152-1">https://dx.doi.org/10.1007/s00586-017-5152-1</a> . |
| #2608 | Perez-Grueso 2000 | Perez-Grueso, F S; Fernandez-Baillo, N; Arauz de Robles, S; Garcia Fernandez, A. The low lumbar spine below Cotrel-Dubousset instrumentation: long-term findings. Spine, 2000, 25, 18, 2333-41. .                                                                                                                                                                                                                                                                                                                                                                                               |
| #2628 | Sweet 2001        | Sweet, F A; Lenke, L G; Bridwell, K H; Blanke, K M; Whorton, J. Prospective radiographic and clinical outcomes and complications of single solid rod instrumented anterior spinal fusion in adolescent idiopathic scoliosis. Spine, 2001, 26, 18, 1956-65. .                                                                                                                                                                                                                                                                                                                                    |
| #2637 | Koch 2001         | Koch, K D; Buchanan, R; Birch, J G; Morton, A A; Gatchel, R J; Browne, R H. Adolescents undergoing surgery for idiopathic scoliosis: how physical and psychological characteristics relate to patient satisfaction with the cosmetic result. Spine, 2001, 26, 19, 2119-24. .                                                                                                                                                                                                                                                                                                                    |

|       |              |                                                                                                                                                                                                                                                                                                                                                                                                                   |
|-------|--------------|-------------------------------------------------------------------------------------------------------------------------------------------------------------------------------------------------------------------------------------------------------------------------------------------------------------------------------------------------------------------------------------------------------------------|
| #2642 | Freidel 2002 | Freidel, Klaus; Petermann, Franz; Reichel, Dagmar; Steiner, Angela; Warschburger, Petra; Weiss, Hans R. Quality of life in women with idiopathic scoliosis. Spine, 2002, 27, 4, E87-91. .                                                                                                                                                                                                                         |
| #2645 | Pratt 2002   | Pratt, Roland K; Burwell, R Geoffrey; Cole, Ashley A; Webb, John K. Patient and parental perception of adolescent idiopathic scoliosis before and after surgery in comparison with surface and radiographic measurements. Spine, 2002, 27, 14, 1543-2. .                                                                                                                                                          |
| #2646 | Gotze 2002   | Gotze, Christian; Liljenqvist, Ulf R; Slomka, Astrid; Gotze, Hans Guenther; Steinbeck, Joern. Quality of life and back pain: outcome 16.7 years after Harrington instrumentation. Spine, 2002, 27, 13, 1456-4. .                                                                                                                                                                                                  |
| #2651 | Asher 2003   | Asher, Marc; Min Lai, Sue; Burton, Doug; Manna, Barbara. Scoliosis research society-22 patient questionnaire: responsiveness to change associated with surgical treatment. Spine, 2003, 28, 1, 25628. .                                                                                                                                                                                                           |
| #2652 | Asher 2003   | Asher, Marc; Min Lai, Sue; Burton, Doug; Manna, Barbara. Discrimination validity of the scoliosis research society-22 patient questionnaire: relationship to idiopathic scoliosis curve pattern and curve size. Spine, 2003, 28, 1, 27242. .                                                                                                                                                                      |
| #2656 | Merola 2002  | Merola, Andrew A; Haheer, Thomas R; Brkaric, Mario; Panagopoulos, Georgia; Mathur, Samir; Kohani, Omid; Lowe, Thomas G; Lenke, Larry G; Wenger, Dennis R; Newton, Peter O; Clements, David H 3rd; Betz, Randal R. A multicenter study of the outcomes of the surgical treatment of adolescent idiopathic scoliosis using the Scoliosis Research Society (SRS) outcome instrument. Spine, 2002, 27, 18, 2046-51. . |
| #2658 | Rinella 2004 | Rinella, Anthony; Lenke, Lawrence; Peelle, Michael; Edwards, Charles; Bridwell, Keith H; Sides, Brenda. Comparison of SRS questionnaire results submitted by both parents and patients in the operative treatment of idiopathic scoliosis. Spine, 2004, 29, 3, 303-10. .                                                                                                                                          |
| #2659 | Asher 2004   | Asher, Marc; Lai, Sue Min; Burton, Doug; Manna, Barbara. The influence of spine and trunk deformity on preoperative idiopathic scoliosis patients' health-related quality of life questionnaire responses. Spine, 2004, 29, 8, 861-8. .                                                                                                                                                                           |

|       |               |                                                                                                                                                                                                                                                                                                                                                                                                                                                                                                                            |
|-------|---------------|----------------------------------------------------------------------------------------------------------------------------------------------------------------------------------------------------------------------------------------------------------------------------------------------------------------------------------------------------------------------------------------------------------------------------------------------------------------------------------------------------------------------------|
| #2676 | Glassman 2005 | Glassman, Steven D; Berven, Sigurd; Bridwell, Keith; Horton, William; Dimar, John R. Correlation of radiographic parameters and clinical symptoms in adult scoliosis. Spine, 2005, 30, 6, 682-8. .                                                                                                                                                                                                                                                                                                                         |
| #2678 | Climent 2005  | Climent, Jose M; Bago, Juan; Ey, Anna; Perez-Grueso, Francisco J S; Izquierdo, Enrique. Validity of the Spanish version of the Scoliosis Research Society-22 (SRS-22) Patient Questionnaire. Spine, 2005, 30, 6, 705-9. .                                                                                                                                                                                                                                                                                                  |
| #2681 | Watanabe 2005 | Watanabe, Kei; Hasegawa, Kazuhiro; Hirano, Toru; Uchiyama, Seiji; Endo, Naoto. Use of the scoliosis research society outcomes instrument to evaluate patient outcome in untreated idiopathic scoliosis patients in Japan: part I: comparison with nonscoliosis group: preliminary/limited review in a Japanese population. Spine, 2005, 30, 10, 1197-201. .                                                                                                                                                                |
| #2682 | Watanabe 2005 | Watanabe, Kei; Hasegawa, Kazuhiro; Hirano, Toru; Uchiyama, Seiji; Endo, Naoto. Use of the scoliosis research society outcomes instrument to evaluate patient outcome in untreated idiopathic scoliosis patients in Japan: part II: relation between spinal deformity and patient outcomes. Spine, 2005, 30, 10, 1202-5. .                                                                                                                                                                                                  |
| #2683 | Feise 2005    | Feise, Ronald J; Donaldson, Sandra; Crowther, Edward R; Menke, J Michael; Wright, James G. Construction and validation of the scoliosis quality of life index in adolescent idiopathic scoliosis. Spine, 2005, 30, 11, 1310-5. .                                                                                                                                                                                                                                                                                           |
| #2702 | Ohashi 2018   | Ohashi, Masayuki; Watanabe, Kei; Hirano, Toru; Hasegawa, Kazuhiro; Katsumi, Keiichi; Shoji, Hirokazu; Tatsuki, Mizouchi; Endo, Naoto. Predicting Factors at Skeletal Maturity for Curve Progression and Low Back Pain in Adult Patients Treated Non-Operatively for Adolescent Idiopathic Scoliosis with Thoracolumbar/Lumbar Curves: A Mean 25-Year Follow-up. Spine, 2018, , 7610646, uxx, 7610649, .<br><a href="https://dx.doi.org/10.1097/BRS.0000000000002716">https://dx.doi.org/10.1097/BRS.0000000000002716</a> . |
| #2735 | Nauffal 2002  | Nauffal, D; Domenech, R; Martinez Garcia, M A; Compte, L; Macian, V; Perpina, M. Noninvasive positive pressure home ventilation in restrictive disorders: outcome and impact on health-related quality of life. Respiratory medicine, 2002, 96, 10, 777-83. .                                                                                                                                                                                                                                                              |
| #2754 | Liu 2009      | Liu, Wei; Chen, Xiong-sheng; Jia, Lian-shun; Song, Dian-wen. The clinical features and surgical treatment of degenerative lumbar scoliosis: a review of 112 patients. Orthopaedic surgery, 2009, 1, 3, 176-83. <a href="https://dx.doi.org/10.1111/j.1757-7861.2009.00030.x">https://dx.doi.org/10.1111/j.1757-7861.2009.00030.x</a> .                                                                                                                                                                                     |

|       |                 |                                                                                                                                                                                                                                                                                                                                                                                                                                                                                                                                                                                                                                                                                                       |
|-------|-----------------|-------------------------------------------------------------------------------------------------------------------------------------------------------------------------------------------------------------------------------------------------------------------------------------------------------------------------------------------------------------------------------------------------------------------------------------------------------------------------------------------------------------------------------------------------------------------------------------------------------------------------------------------------------------------------------------------------------|
| #2756 | Zhang 2017      | Zhang, Hao-Cong; Zhang, Zi-Fang; Wang, Zhao-Han; Cheng, Jun-Yao; Wu, Yun-Chang; Fan, Yi-Ming; Wang, Tian-Hao; Wang, Zheng. Optimal Pelvic Incidence Minus Lumbar Lordosis Mismatch after Long Posterior Instrumentation and Fusion for Adult Degenerative Scoliosis. Orthopaedic surgery, 2017, 9, 3, 304-310. <a href="https://dx.doi.org/10.1111/os.12343">https://dx.doi.org/10.1111/os.12343</a> .                                                                                                                                                                                                                                                                                                |
| #2791 | Mannion 2018    | Mannion, A F; Eitering, A; Bago, J; Pellise, F; Vila-Casademunt, A; Kichner-Wunderlin, S; Domingo-Sabat, M; Uebel, I; Acaroglu, E; Alanay, A; Perez-Grueso, F S; Baldus, C R; Carreon, L Y; Bridwell, K H; Glassman, S D; Kleinstuck, F; European Spine Study Group (ESSG). Factor analysis of the SRS-22 outcome assessment instrument in patients with adult spinal deformity. European spine journal : official publication of the European Spine Society, the European Spinal Deformity Society, and the European Section of the Cervical Spine Research Society, 2018, 27, 3, 685-699. <a href="https://dx.doi.org/10.1007/s00586-017-5279-0">https://dx.doi.org/10.1007/s00586-017-5279-0</a> . |
| #2821 | Simony 2016     | Simony, Ane; Carreon, Leah Y; Hansen, Karen Hoejmark; Andersen, Mikkel O. Reliability and Validity Testing of a Danish Translated Version of Spinal Appearance Questionnaire (SAQ) v 1.1. Spine deformity, 2016, 4, 2, 94-97. <a href="https://dx.doi.org/10.1016/j.jsdpd.2015.08.007">https://dx.doi.org/10.1016/j.jsdpd.2015.08.007</a> .                                                                                                                                                                                                                                                                                                                                                           |
| #2867 | Olafsson 1999   | Olafsson, Y; Saraste, H; Ahlgren, R M. Does bracing affect self-image? A prospective study on 54 patients with adolescent idiopathic scoliosis. European spine journal : official publication of the European Spine Society, the European Spinal Deformity Society, and the European Section of the Cervical Spine Research Society, 1999, 8, 5, 402-5. .                                                                                                                                                                                                                                                                                                                                             |
| #2888 | Gabos 2004      | Gabos, Peter G; Bojescul, John A; Bowen, J Richard; Keeler, Kathryn; Rich, Lillian. Long-term follow-up of female patients with idiopathic scoliosis treated with the Wilmington orthosis. The Journal of bone and joint surgery. American volume, 2004, 86, 9, 1891-9. .                                                                                                                                                                                                                                                                                                                                                                                                                             |
| #2906 | Scheer 2017     | Scheer, Justin K; Smith, Justin S; Schwab, Frank; Lafage, Virginie; Shaffrey, Christopher I; Bess, Shay; Daniels, Alan H; Hart, Robert A; Protopsaltis, Themistocles S; Mundis, Gregory M Jr; Sciubba, Daniel M; Ailon, Tamir; Burton, Douglas C; Klineberg, Eric; Ames, Christopher P; International Spine Study Group. Development of a preoperative predictive model for major complications following adult spinal deformity surgery. Journal of neurosurgery. Spine, 2017, 26, 6, 736-743. <a href="https://dx.doi.org/10.3171/2016.10.SPINE16197">https://dx.doi.org/10.3171/2016.10.SPINE16197</a> .                                                                                           |
| #2916 | Lamontagne 2001 | Lamontagne, L L; Hepworth, J T; Salisbury, M H. Anxiety and postoperative pain in children who undergo major orthopedic surgery. Applied nursing research : ANR, 2001, 14, 3, 119-24. .                                                                                                                                                                                                                                                                                                                                                                                                                                                                                                               |
| #2919 | Parsch 2002     | Parsch, Dominik; Gartner, Vera; Brocai, Dario R C; Carstens, Claus; Schmitt, Holger. Sports activity of patients with idiopathic scoliosis at long-term follow-up. Clinical journal of sport medicine : official journal of the Canadian Academy of Sport Medicine, 2002, 12, 2, 349-12. .                                                                                                                                                                                                                                                                                                                                                                                                            |

|       |                 |                                                                                                                                                                                                                                                                                                                                                                                                                                                                                                            |
|-------|-----------------|------------------------------------------------------------------------------------------------------------------------------------------------------------------------------------------------------------------------------------------------------------------------------------------------------------------------------------------------------------------------------------------------------------------------------------------------------------------------------------------------------------|
| #2956 | Cheung 2019     | Cheung, Prudence Wing Hang; Wong, Carlos King Ho; Cheung, Jason Pui Yin. An Insight Into the Health-Related Quality of Life of Adolescent Idiopathic Scoliosis Patients Who Are Braced, Observed, and Previously Braced. <i>Spine</i> , 2019, 44, 10, E596-E605. <a href="https://dx.doi.org/10.1097/BRS.0000000000002918">https://dx.doi.org/10.1097/BRS.0000000000002918</a> .                                                                                                                           |
| #2964 | Thompson 2019   | Thompson, J Y; Williamson, E M; Williams, M A; Heine, P J; Lamb, S E; ACTivATeS Study Group. Effectiveness of scoliosis-specific exercises for adolescent idiopathic scoliosis compared with other non-surgical interventions: a systematic review and meta-analysis. <i>Physiotherapy</i> , 2019, 105, 2, 214-234. <a href="https://dx.doi.org/10.1016/j.physio.2018.10.004">https://dx.doi.org/10.1016/j.physio.2018.10.004</a> .                                                                        |
| #2969 | Prudnikova 2018 | Prudnikova, Oksana G; Shchurova, Elena N. Surgical correction of severe spinal deformities using a staged protocol of external and internal techniques. <i>International orthopaedics</i> , 2018, 42, 2, 331-338. <a href="https://dx.doi.org/10.1007/s00264-017-3738-1">https://dx.doi.org/10.1007/s00264-017-3738-1</a> .                                                                                                                                                                                |
| #2981 | Cheung 2018     | Cheung, Prudence Wing Hang; Wong, Carlos King Ho; Lau, Sin Ting; Cheung, Jason Pui Yin. Responsiveness of the EuroQoL 5-dimension (EQ-5D) in adolescent idiopathic scoliosis. <i>European spine journal : official publication of the European Spine Society, the European Spinal Deformity Society, and the European Section of the Cervical Spine Research Society</i> , 2018, 27, 2, 278-285. <a href="https://dx.doi.org/10.1007/s00586-017-5330-1">https://dx.doi.org/10.1007/s00586-017-5330-1</a> . |
| #2984 | Yagi 2018       | Yagi, Mitsuru; Fujita, Nobuyuki; Okada, Eijiro; Tsuji, Osahiko; Nagoshi, Narihito; Tsuji, Takashi; Asazuma, Takashi; Nakamura, Masaya; Matsumoto, Morio; Watanabe, Kota. Impact of Frailty and Comorbidities on Surgical Outcomes and Complications in Adult Spinal Disorders. <i>Spine</i> , 2018, 43, 18, 1259-1267. <a href="https://dx.doi.org/10.1097/BRS.0000000000002596">https://dx.doi.org/10.1097/BRS.0000000000002596</a> .                                                                     |
| #2989 | Zaina 2018      | Zaina, Fabio; Poggio, Martina; Donzelli, Sabrina; Negrini, Stefano. Can bracing help adults with chronic back pain and scoliosis? Short-term results from a pilot study. <i>Prosthetics and orthotics international</i> , 2018, 42, 4, 410-414. <a href="https://dx.doi.org/10.1177/0309364618757769">https://dx.doi.org/10.1177/0309364618757769</a> .                                                                                                                                                    |
| #2990 | Cawley 2018     | Cawley, Derek T; Larrieu, Daniel; Fujishiro, Takashi; Kieser, David; Boissiere, Louis; Acaroglu, Emre; Alanay, Ahmet; Kleinstuck, Frank; Pellise, Ferran; Perez-Grueso, Francisco Sanchez; Vital, Jean-Marc; Gille, Olivier; Obeid, Ibrahim. NRS20: Combined Back and Leg Pain Score: A Simple and Effective Assessment of Adult Spinal Deformity. <i>Spine</i> , 2018, 43, 17, 1184-1192. <a href="https://dx.doi.org/10.1097/BRS.0000000000002633">https://dx.doi.org/10.1097/BRS.0000000000002633</a> . |
| #2991 | Yagci 2018      | Yagci, Gozde; Ayhan, Cigdem; Yakut, Yavuz. Effectiveness of basic body awareness therapy in adolescents with idiopathic scoliosis: A randomized controlled study1. <i>Journal of back and musculoskeletal rehabilitation</i> , 2018, 31, 4, 693-701. <a href="https://dx.doi.org/10.3233/BMR-170868">https://dx.doi.org/10.3233/BMR-170868</a> .                                                                                                                                                           |

|       |                |                                                                                                                                                                                                                                                                                                                                                                                                                                                                                                                                                                                                                                                                                                                                                              |
|-------|----------------|--------------------------------------------------------------------------------------------------------------------------------------------------------------------------------------------------------------------------------------------------------------------------------------------------------------------------------------------------------------------------------------------------------------------------------------------------------------------------------------------------------------------------------------------------------------------------------------------------------------------------------------------------------------------------------------------------------------------------------------------------------------|
| #2995 | Liang 2018     | Liang, Yan; Zhao, Yongfei; Wang, Tianhao; Zhu, Zhenqi; Liu, Haiying; Mao, Keya. Precision Treatment of Adult Lumbar Degenerative Scoliosis Complicated by Lumbar Stenosis with the Use of Selective Nerve Root Block. <i>World neurosurgery</i> , 2018, 120, 101528275, e970-e975. <a href="https://dx.doi.org/10.1016/j.wneu.2018.08.205">https://dx.doi.org/10.1016/j.wneu.2018.08.205</a> .                                                                                                                                                                                                                                                                                                                                                               |
| #2996 | Langella 2018  | Langella, Francesco; Villiarane, Jorge Hugo; Larage, virginie; Smith, Justin S; Shattrey, Christopher; Kim, Han Jo; Burton, Douglas; Hostin, Richard; Bess, Shay; Ames, Christopher; Mundis, Gregory; Klineberg, Eric; Schwab, Frank; Lafage, Renault; Berjano, Pedro. Xipho-pubic angle (XPA) correlates with patient's reported outcomes in a population of adult spinal deformity: results from a multi-center cohort study. <i>European spine journal : official publication of the European Spine Society, the European Spinal Deformity Society, and the European Section of the Cervical Spine Research Society</i> , 2018, 27, 3, 670-677. <a href="https://dx.doi.org/10.1007/s00586-017-5460-5">https://dx.doi.org/10.1007/s00586-017-5460-5</a> . |
| #2997 | Yagi 2018      | Yagi, Mitsuru; Ames, Christopher P; Keere, Maria; Hosogane, Naobumi; Smith, Justin S; Shattrey, Christopher I; Schwab, Frank; Larage, Virginie; Shay Bess, R; Matsumoto, Morio; Watanabe, Kota; International Spine Study Group (ISSG). A cost-effectiveness comparisons of adult spinal deformity surgery in the United States and Japan. <i>European spine journal : official publication of the European Spine Society, the European Spinal Deformity Society, and the European Section of the Cervical Spine Research Society</i> , 2018, 27, 3, 678-684. <a href="https://dx.doi.org/10.1007/s00586-017-5274-5">https://dx.doi.org/10.1007/s00586-017-5274-5</a> .                                                                                      |
| #3007 | Sanders 2018   | Sanders, Austin E; Andras, Lindsay M; Iantorno, Stephanie E; Hamilton, Anita; Choi, Paul D; Skaggs, David L. Clinically Significant Psychological and Emotional Distress in 32% of Adolescent Idiopathic Scoliosis Patients. <i>Spine deformity</i> , 2018, 6, 4, 435-440. <a href="https://dx.doi.org/10.1016/j.jspd.2017.12.014">https://dx.doi.org/10.1016/j.jspd.2017.12.014</a> .                                                                                                                                                                                                                                                                                                                                                                       |
| #3028 | Liang 2018     | Liang, Juping; Zhou, Xuan; Chen, Nan; Li, Xin; Yu, Hong; Yang, Yuqi; Song, Yuanyuan; Du, Qing. Efficacy of three-dimensionally integrated exercise for scoliosis in patients with adolescent idiopathic scoliosis: study protocol for a randomized controlled trial. <i>Trials</i> , 2018, 19, 1, 485. <a href="https://dx.doi.org/10.1186/s13063-018-2834-x">https://dx.doi.org/10.1186/s13063-018-2834-x</a> .                                                                                                                                                                                                                                                                                                                                             |
| #3029 | Terheyden 2018 | Terheyden, Jan Henrik; Wetterkamp, Mark; Gosheger, Georg; Lange, Tobias; Schulze Bovingloh, Albert; Schulte, Tobias L. Rasterstereography versus radiography for assessing shoulder balance in idiopathic scoliosis: A validation study relative to patients' self-image. <i>Journal of back and musculoskeletal rehabilitation</i> , 2018, 31, 6, 1049-1057. <a href="https://dx.doi.org/10.3233/BMR-170867">https://dx.doi.org/10.3233/BMR-170867</a> .                                                                                                                                                                                                                                                                                                    |
| #3030 | Zhao 2018      | Zhao, Jian; Yang, Mingyuan; Yang, Yiling; Chen, Ziqiang; Li, Ming. Proximal junctional kyphosis following correction surgery in the Lenke 5 adolescent idiopathic scoliosis patient. <i>Journal of orthopaedic science : official journal of the Japanese Orthopaedic Association</i> , 2018, 23, 5, 744-749. <a href="https://dx.doi.org/10.1016/j.jos.2018.05.010">https://dx.doi.org/10.1016/j.jos.2018.05.010</a> .                                                                                                                                                                                                                                                                                                                                      |
| #3038 | Wang 2019      | Wang, Kai; Zhang, Can; Cheng, Cheng; Jian, Fengzeng; Wu, Hao. Radiographic and Clinical Outcomes following Combined Oblique Lumbar Interbody Fusion and Lateral Instrumentation for the Treatment of Degenerative Spine Deformity: A Preliminary Retrospective Study. <i>BioMed research international</i> , 2019, 2019, 101600173, 5672162. <a href="https://dx.doi.org/10.1155/2019/5672162">https://dx.doi.org/10.1155/2019/5672162</a> .                                                                                                                                                                                                                                                                                                                 |

|       |                   |                                                                                                                                                                                                                                                                                                                                                                                                                                                                                                                                                                                                                                                                                           |
|-------|-------------------|-------------------------------------------------------------------------------------------------------------------------------------------------------------------------------------------------------------------------------------------------------------------------------------------------------------------------------------------------------------------------------------------------------------------------------------------------------------------------------------------------------------------------------------------------------------------------------------------------------------------------------------------------------------------------------------------|
| #3041 | Protopsaltis 2018 | Protopsaltis, I nemistocies S; Diebo, Bassel G; Larage, Renaud; Henry, Jensen K; Smith, Justin S; Scheer, Justin K; Sciubba, Daniel M; Passias, Peter G; Kim, Han Jo; Hamilton, David K; Soroceanu, Alexandra; Klineberg, Eric O; Ames, Christopher P; Shaffrey, Christopher I; Bess, Shay; Hart, Robert A; Schwab, Frank J; Lafage, Virginie; International Spine Study Group. Identifying Thoracic Compensation and Predicting Reciprocal Thoracic Kyphosis and Proximal Junctional Kyphosis in Adult Spinal Deformity Surgery. <i>Spine</i> , 2018, 43, 21, 1479-1486. <a href="https://dx.doi.org/10.1097/BRS.0000000000002843">https://dx.doi.org/10.1097/BRS.0000000000002843</a> . |
| #3046 | Lee 2017          | Lee, Chang-Hyun; Chung, Chun Kee; Sohn, Moon Jun; Kim, Chi Heon. Short Limited Fusion Versus Long Fusion With Deformity Correction for Spinal Stenosis With Balanced De Novo Degenerative Lumbar Scoliosis: A Meta-analysis of Direct Comparative Studies. <i>Spine</i> , 2017, 42, 19, E1126-E1132. <a href="https://dx.doi.org/10.1097/BRS.0000000000002306">https://dx.doi.org/10.1097/BRS.0000000000002306</a> .                                                                                                                                                                                                                                                                      |
| #3051 | Diarbakerli 2018  | Diarbakerli, Elias; Grauers, Anna; Danielsson, Aina; Gerdhem, Paul. Health-Related Quality of Life in Adulthood in Untreated and Treated Individuals with Adolescent or Juvenile Idiopathic Scoliosis. <i>The Journal of bone and joint surgery. American volume</i> , 2018, 100, 10, 811-817. <a href="https://dx.doi.org/10.2106/JBJS.17.00822">https://dx.doi.org/10.2106/JBJS.17.00822</a> .                                                                                                                                                                                                                                                                                          |
| #3058 | Miyanji 2018      | Miyanji, Firoz; Nasto, Luigi A; Bastrom, Tracey; Samdani, Amer F; Yaszay, Burt; Clements, David; Shah, Suken A; Lonner, Baron; Betz, Randal R; Shuffelbarger, Harry L; Newton, Peter O. A Detailed Comparative Analysis of Anterior Versus Posterior Approach to Lenke 5C Curves. <i>Spine</i> , 2018, 43, 5, E285-E291. <a href="https://dx.doi.org/10.1097/BRS.0000000000002313">https://dx.doi.org/10.1097/BRS.0000000000002313</a> .                                                                                                                                                                                                                                                  |
| #3069 | Kwan 2018         | Kwan, Mun Keong; Chiu, Chee Kidd; Tan, Pheng Hian; Chian, Xue Han; Ler, Xin Yi; Ng, Yun Hui; Ng, Sherwin Johan; Goh, Saw Huan; Chan, Chris Yin Wei. Radiological and clinical outcome of selective thoracic fusion for patients with Lenke 1C and 2C adolescent idiopathic scoliosis with a minimum follow-up of 2 years. <i>The spine journal : official journal of the North American Spine Society</i> , 2018, 18, 12, 2239-2246. <a href="https://dx.doi.org/10.1016/j.spinee.2018.05.007">https://dx.doi.org/10.1016/j.spinee.2018.05.007</a> .                                                                                                                                      |
| #3090 | Hori 2019         | Hori, Yusuke; Matsumura, Akira; Namikawa, Takashi; Kato, Minori; Takahashi, Shinji; Ohyama, Shoichiro; Ozaki, Tomonori; Yabu, Akito; Nakamura, Hiroaki. Does sagittal imbalance impact the surgical outcomes of short-segment fusion for lumbar spinal stenosis associated with degenerative lumbar scoliosis?. <i>Journal of orthopaedic science : official journal of the Japanese Orthopaedic Association</i> , 2019, 24, 2, 224-229. <a href="https://dx.doi.org/10.1016/j.jos.2018.10.005">https://dx.doi.org/10.1016/j.jos.2018.10.005</a> .                                                                                                                                        |
| #3093 | Verma 2019        | Verma, Ravi; Lafage, Renaud; Scheer, Justin; Smith, Justin; Passias, Peter; Hostin, Richard; Ames, Christopher; Mundis, Gregory; Burton, Douglas; Kim, Han Jo; Bess, Shay; Klineberg, Eric; Schwab, Frank; Lafage, Virginie; International Spine Study Group. Improvement in Back and Leg Pain and Disability Following Adult Spinal Deformity Surgery: Study of 324 Patients With 2-year Follow-up and the Impact of Surgery on Patient-reported Outcomes. <i>Spine</i> , 2019, 44, 4, 263-269. <a href="https://dx.doi.org/10.1097/BRS.0000000000002815">https://dx.doi.org/10.1097/BRS.0000000000002815</a> .                                                                          |
| #3112 | Passias 2018      | Passias, Peter G; Jalai, Cyrus M; Lafage, Virginie; Poorman, Gregory W; Vira, Shaleen; Horn, Samantha R; Scheer, Justin K; Hamilton, D Kojo; Line, Breton G; Bess, Shay; Schwab, Frank J; Ames, Christopher P; Burton, Douglas C; Hart, Robert A; Klineberg, Eric O. Recovery Kinetics of Radiographic and Implant-Related Revision Patients Following Adult Spinal Deformity Surgery. <i>Neurosurgery</i> , 2018, 83, 4, 700-708. <a href="https://dx.doi.org/10.1093/neuros/nyx490">https://dx.doi.org/10.1093/neuros/nyx490</a> .                                                                                                                                                      |

- Uribe, Juan S; Januszewski, Jacob; Wang, Michael; Anand, Neel; Okonkwo, David O; Mummaneni, Praveen V; Nguyen, Stacie; Zavatsky, Joseph; Than, Khoi; Nunley, Pierce; Park, Paul; Kanter, Adam S; La Marca, Frank; Fessler, Richard; Mundis, Gregory M; Eastlack, Robert K; Minimally Invasive Surgery Section of the International Spine Study Group. Patients with High Pelvic Tilt Achieve the Same Clinical Success as Those with Low Pelvic Tilt After Minimally Invasive Adult Deformity Surgery. *Neurosurgery*, 2018, 83, 2, 270-276.
- #3115 Uribe 2018 <https://dx.doi.org/10.1093/neuros/nyx383>.
- Hosogane, Naobumi; Ames, Christopher; Matsumoto, Morio; Yagi, Mitsuru; Matsuyama, Yukinori; Ianeichi, Hiroshi; Yamato, Yu; Takeuchi, Daisaku; Schwab, Frank; Shaffrey, Christopher; Smith, Justin S; Bess, Shay; Lafage, Virginie; International Spine Study Group. Ethnic Variations in Radiographic Parameters and SRS-22 Scores in Adult Spinal Deformity: A Comparison Between North American and Japanese Patients Above 50 Years of Age With Minimum 2-Year Follow-up. *Clinical spine surgery*, 2018, 31, 5, 216-221.
- #3127 Hosogane 2018 <https://dx.doi.org/10.1097/BSD.0000000000000610>.
- Ketenci, Ismail Emre; Yanik, Hakan Serhat; Erdem, Sevki. The effect of upper instrumented vertebra level on cervical sagittal alignment in Lenke 1 adolescent idiopathic scoliosis. *Orthopaedics & traumatology, surgery & research : OTSR*, 2018, 104, 5, 623-629.
- #3134 Ketenci 2018 <https://dx.doi.org/10.1016/j.otsr.2018.06.003>.
- Scheer, Justin K; Un, Taemin; Smith, Justin S; Shaffrey, Christopher I; Daniels, Alan H; Sciubba, Daniel M; Hamilton, U Kojo; Protopsaltis, Themistocles S; Passias, Peter G; Hart, Robert A; Burton, Douglas C; Bess, Shay; Lafage, Renaud; Lafage, Virginie; Schwab, Frank; Klineberg, Eric O; Ames, Christopher P; International Spine Study Group. Development of a validated computer-based preoperative predictive model for pseudarthrosis with 91% accuracy in 336 adult spinal deformity patients. *Neurosurgical focus*, 2018, 45, 5, E11.
- #3144 Scheer 2018 <https://dx.doi.org/10.3171/2018.8.FOCUS18246>.
- Duramaz, Altug; Yilmaz, Semra; Ziroglu, Nezi; Bursal Duramaz, Burcu; Kara, Tayfun. The effect of deformity correction on psychiatric condition of the adolescent with adolescent idiopathic scoliosis. *European spine journal : official publication of the European Spine Society, the European Spinal Deformity Society, and the European Section of the Cervical Spine Research Society*, 2018, 27, 9, 2233-2240.
- #3155 Duramaz 2018 <https://dx.doi.org/10.1007/s00586-018-5639-4>.
- Passias, Peter G; Poorman, Gregory W; Lafage, Virginie; Smith, Justin; Ames, Christopher; Schwab, Frank; Shaffrey, Chris; Segreto, Frank A; Horn, Samantha R; Bortz, Cole A; Varlotta, Christopher G; Hockley, Aaron; Wang, Charles; Daniels, Alan; Neuman, Brian; Hart, Robert; Burton, Douglas; Javidan, Yashar; Line, Breton; LaFage, Renaud; Bess, Shay; Sciubba, Daniel; ISSG. Cervical Versus Thoracolumbar Spinal Deformities: A Comparison of Baseline Quality-of-Life Burden. *Clinical spine surgery*, 2018, 31, 10, 413-419.
- #3158 Passias 2018 <https://dx.doi.org/10.1097/BSD.0000000000000743>.
- Caronni, Antonio; Donzelli, Sabrina; Zaina, Fabio; Negrini, Stefano. The Italian Spine Youth Quality of Life questionnaire measures health-related quality of life of adolescents with spinal deformities better than the reference standard, the Scoliosis Research Society 22 questionnaire. *Clinical rehabilitation*, 2019, 33, 8, 1404-1415. <https://dx.doi.org/10.1177/0269215519842246>.
- #3160 Caronni 2019
- Louer, Craig Jr; Yaszay, Burt; Cross, Madeline; Bartley, Carrie E; Bastrom, Tracey P; Shah, Suken A; Lonner, Baron; Cahill, Patrick J; Samdani, Amer; Upasani, Vidyadhar V; Newton, Peter O. Ten-Year Outcomes of Selective Fusions for Adolescent Idiopathic Scoliosis. *The Journal of bone and joint surgery. American volume*, 2019, 101, 9, 761-770. <https://dx.doi.org/10.2106/JBJS.18.01013>.
- #3162 Louer 2019



|       |                 |                                                                                                                                                                                                                                                                                                                                                                                                                                                                                                                                                                                                                                                               |
|-------|-----------------|---------------------------------------------------------------------------------------------------------------------------------------------------------------------------------------------------------------------------------------------------------------------------------------------------------------------------------------------------------------------------------------------------------------------------------------------------------------------------------------------------------------------------------------------------------------------------------------------------------------------------------------------------------------|
| #3164 | Makino 2019     | Makino, Takahiro; Kaito, Takashi; Sakai, Yusuke; Takenaka, Shota; Yoshikawa, Hideki. Health-related Quality of Life and Postural Changes of Spinal Alignment in Female Adolescents Associated With Back Pain in Adolescent Idiopathic Scoliosis: A Prospective Cross-sectional Study. <i>Spine</i> , 2019, 44, 14, E833-E840. <a href="https://dx.doi.org/10.1097/BRS.0000000000002996">https://dx.doi.org/10.1097/BRS.0000000000002996</a> .                                                                                                                                                                                                                 |
| #3170 | Swamy 2019      | Swamy, Ganesh; Lopatina, Elena; Thomas, Ken C; Marshall, Deborah A; Johal, Herman S. The cost effectiveness of minimally invasive spine surgery in the treatment of adult degenerative scoliosis: a comparison of transpsoas and open techniques. <i>The spine journal : official journal of the North American Spine Society</i> , 2019, 19, 2, 339-348. <a href="https://dx.doi.org/10.1016/j.spinee.2018.05.040">https://dx.doi.org/10.1016/j.spinee.2018.05.040</a> .                                                                                                                                                                                     |
| #3171 | Katayanagi 2019 | Katayanagi, Junya; Iida, Takahiro; Hayamizu, Atsuki; Matsumoto, Kazuyuki; Ohyama, Yasumasa; Mine, Ken; Ozeki, Satoru. Effect of long spinal fusion including the pelvis on activities of daily living related to lumbar spinal function in adults with spinal deformity. <i>Journal of orthopaedic science : official journal of the Japanese Orthopaedic Association</i> , 2019, 24, 3, 409-414. <a href="https://dx.doi.org/10.1016/j.jos.2018.10.022">https://dx.doi.org/10.1016/j.jos.2018.10.022</a> .                                                                                                                                                   |
| #3172 | Neal 2018       | Neal, Chris J; Mandell, Kara; Tasikas, Ellen; Delaney, John J; Miller, Charles A; Schlaff, Cody D; Rosner, Michael K. Cost-effectiveness of adult spinal deformity surgery in a military healthcare system. <i>Neurosurgical focus</i> , 2018, 45, 6, E11. <a href="https://dx.doi.org/10.3171/2018.9.FOCUS18381">https://dx.doi.org/10.3171/2018.9.FOCUS18381</a> .                                                                                                                                                                                                                                                                                          |
| #3174 | Haddas 2019     | Haddas, Ram; Lieberman, Isador H. The Change in Sway and Neuromuscular Activity in Adult Degenerative Scoliosis Patients Pre and Post Surgery Compared With Controls. <i>Spine</i> , 2019, 44, 15, E899-E907. <a href="https://dx.doi.org/10.1097/BRS.0000000000003009">https://dx.doi.org/10.1097/BRS.0000000000003009</a> .                                                                                                                                                                                                                                                                                                                                 |
| #3177 | Ames 2019       | Ames, Christopher P; Smith, Justin S; Pellise, Ferran; Kelly, Michael P; Gum, Jeffrey L; Alanay, Ahmet; Acaroglu, Emre; Perez-Grueso, Francisco Javier Sanchez; Kleinstuck, Frank S; Obeid, Ibrahim; Vila-Casademunt, Alba; Burton, Douglas C; Lafage, Virginie; Schwab, Frank J; Shaffrey, Christopher I; Bess, Shay; Serra-Burriel, Miquel; European Spine Study Group, International Spine Study Group. Development of Deployable Predictive Models for Minimal Clinically Important Difference Achievement Across the Commonly Used Health-related Quality of Life Instruments in Adult Spinal Deformity Surgery. <i>Spine</i> , 2019, 44, 16, 1144-1153. |
| #3180 | Schreiber 2019  | Schreiber, Sanja; Parent, Eric C; Hill, Doug L; Hedden, Douglas M; Moreau, Marc J; Southon, Sarah C. Patients with adolescent idiopathic scoliosis perceive positive improvements regardless of change in the Cobb angle - Results from a randomized controlled trial comparing a 6-month Schroth intervention added to standard care and standard care alone. SOSORT 2018 Award winner. <i>BMC musculoskeletal disorders</i> , 2019, 20, 1, 319. <a href="https://dx.doi.org/10.1186/s12891-019-2695-9">https://dx.doi.org/10.1186/s12891-019-2695-9</a> .                                                                                                   |
| #3188 | Yagci 2019      | Yagci, Gozde; Yakut, Yavuz. Core stabilization exercises versus scoliosis-specific exercises in moderate idiopathic scoliosis treatment. <i>Prosthetics and orthotics international</i> , 2019, 43, 3, 301-308. <a href="https://dx.doi.org/10.1177/0309364618820144">https://dx.doi.org/10.1177/0309364618820144</a> .                                                                                                                                                                                                                                                                                                                                       |

|       |                  |                                                                                                                                                                                                                                                                                                                                                                                                                                                                                                                                                                                                                                                          |
|-------|------------------|----------------------------------------------------------------------------------------------------------------------------------------------------------------------------------------------------------------------------------------------------------------------------------------------------------------------------------------------------------------------------------------------------------------------------------------------------------------------------------------------------------------------------------------------------------------------------------------------------------------------------------------------------------|
| #3191 | Diarbakerli 2019 | Diarbakerli, Elias; Grauers, Anna; Danielsson, Aina; Abbott, Allan; Gerdhem, Paul. Quality of Life in Males and Females With Idiopathic Scoliosis. <i>Spine</i> , 2019, 44, 6, 404-410. <a href="https://dx.doi.org/10.1097/BRS.0000000000002857">https://dx.doi.org/10.1097/BRS.0000000000002857</a> .                                                                                                                                                                                                                                                                                                                                                  |
| #3193 | Zhang 2019       | Zhang, Yangpu; Tao, Luming; Hai, Yong; Yang, Jincai; Zhou, Lijin; Yin, Peng; Pan, Aixing; Liu, Chang. One-Stage Posterior Multiple-Level Asymmetrical Ponte Osteotomies Versus Single-Level Posterior Vertebral Column Resection for Severe and Rigid Adult Idiopathic Scoliosis: A Minimum 2-Year Follow-up Comparative Study. <i>Spine</i> , 2019, 44, 20, E1196-E1205. <a href="https://dx.doi.org/10.1097/BRS.0000000000003101">https://dx.doi.org/10.1097/BRS.0000000000003101</a> .                                                                                                                                                                |
| #3197 | Sharma 2019      | Sharma, Akshay; Tanenbaum, Joseph E; Hogue, Olivia; Mehdi, Syed; Vallabh, Sagar; Hu, Emily; Benzel, Edward C; Steinmetz, Michael P; Savage, Jason W. Predicting Clinical Outcomes Following Surgical Correction of Adult Spinal Deformity. <i>Neurosurgery</i> , 2019, 84, 3, 733-740. <a href="https://dx.doi.org/10.1093/neuros/nyy190">https://dx.doi.org/10.1093/neuros/nyy190</a> .                                                                                                                                                                                                                                                                 |
| #3202 | Yuksel 2019      | Yukse, Seicen; Aynan, Selim; Nabiye, Vugar; Domingo-Sabat, Montse; Vila-Casademunt, Aiba; Ubeid, Ibrahim; Perez-Grueso, Francisco Sanchez; Acaroglu, Emre; European Spine Study Group (ESSG). Minimum clinically important difference of the health-related quality of life scales in adult spinal deformity calculated by latent class analysis: is it appropriate to use the same values for surgical and nonsurgical patients?. <i>The spine journal : official journal of the North American Spine Society</i> , 2019, 19, 1, 71-78. <a href="https://dx.doi.org/10.1016/j.spinee.2018.07.005">https://dx.doi.org/10.1016/j.spinee.2018.07.005</a> . |
| #3203 | Raad 2019        | Raad, Micheal; Jain, Amit; Huang, Mitchell; Skolasky, Richard L; Sciubba, Daniel M; Kebaish, Khaled M; Neuman, Brian J. Validity and responsiveness of PROMIS in adult spinal deformity: The need for a self-image domain. <i>The spine journal : official journal of the North American Spine Society</i> , 2019, 19, 1, 50-55. <a href="https://dx.doi.org/10.1016/j.spinee.2018.07.014">https://dx.doi.org/10.1016/j.spinee.2018.07.014</a> .                                                                                                                                                                                                         |
| #3208 | Wong 2019        | Wong, Carlos King Ho; Cheung, Prudence Wing Hang; Luo, Nan; Lin, Jiaer; Cheung, Jason Pui Yin. Responsiveness of EQ-5D Youth version 5-level (EQ-5D-5L-Y) and 3-level (EQ-5D-3L-Y) in Patients With Idiopathic Scoliosis. <i>Spine</i> , 2019, 44, 21, 1507-1514. <a href="https://dx.doi.org/10.1097/BRS.0000000000003116">https://dx.doi.org/10.1097/BRS.0000000000003116</a> .                                                                                                                                                                                                                                                                        |
| #3210 | Yagci 2019       | Yagci, Gozde; Demirkiran, Gokhan; Yakut, Yavuz. In-brace alterations of pulmonary functions in adolescents wearing a brace for idiopathic scoliosis. <i>Prosthetics and orthotics international</i> , 2019, 43, 4, 434-439. <a href="https://dx.doi.org/10.1177/0309364619839856">https://dx.doi.org/10.1177/0309364619839856</a> .                                                                                                                                                                                                                                                                                                                      |
| #3211 | Segreto 2019     | Segreto, Frank A; Messina, James C; Doran, James P; Walker, Sarah E; Aylyarov, Alexandr; Shah, Neil V; Mixa, Patrick J; Ahmed, Natasha; Paltoo, Karen; Opere-Sem, Kwaku; Kaur, Harleen; Day, Louis M; Naziri, Qais; Paulino, Carl B; Scott, Claude B; Hesham, Khalid; Urban, William P; Diebo, Bassel G. Noncontact sports participation in adolescent idiopathic scoliosis: effects on parent-reported and patient-reported outcomes. <i>Journal of pediatric orthopedics. Part B</i> , 2019, 28, 4, 356-361. <a href="https://dx.doi.org/10.1097/BPB.0000000000000574">https://dx.doi.org/10.1097/BPB.0000000000000574</a> .                           |

|       |                      |                                                                                                                                                                                                                                                                                                                                                                                                                                                                                                                                                                         |
|-------|----------------------|-------------------------------------------------------------------------------------------------------------------------------------------------------------------------------------------------------------------------------------------------------------------------------------------------------------------------------------------------------------------------------------------------------------------------------------------------------------------------------------------------------------------------------------------------------------------------|
| #3215 | Lin 2019             | Lin, Tao; Meng, Yichen; Ji, Zhe; Jiang, Heng; Shao, Wei; Gao, Rui; Zhou, Xuhui. Extent of Depression in Juvenile and Adolescent Patients with Idiopathic Scoliosis During Treatment with Braces. <i>World neurosurgery</i> , 2019, 126, 101528275, e27-e32. <a href="https://dx.doi.org/10.1016/j.wneu.2019.01.095">https://dx.doi.org/10.1016/j.wneu.2019.01.095</a> .                                                                                                                                                                                                 |
| #3221 | Than 2019            | Than, Khoi D; Park, Paul; Tran, Stacie; Mundis, Gregory M; Fu, Kai-Ming; Uribe, Juan S; Okonkwo, David O; Nunley, Pierce D; Fessler, Richard G; Eastlack, Robert K; Kanter, Adam; Anand, Neel; LaMarca, Frank; Passias, Peter G; Mummaneni, Praveen V; International Spine Study Group. Analysis of Complications with Staged Surgery for Less Invasive Treatment of Adult Spinal Deformity. <i>World neurosurgery</i> , 2019, 126, 101528275, e1337-e1342. <a href="https://dx.doi.org/10.1016/j.wneu.2019.03.090">https://dx.doi.org/10.1016/j.wneu.2019.03.090</a> . |
| #3222 | Ketenci 2018         | Ketenci, Ismail Emre; Yanik, Hakan Serhat; Ulusoy, Ayhan; Demiroz, Serdar; Erdem, Sevki. Lowest Instrumented Vertebrae Selection for Posterior Fusion of Lenke 5C Adolescent Idiopathic Scoliosis: Can We Stop the Fusion One Level Proximal to Lower-end Vertebra?. <i>Indian journal of orthopaedics</i> , 2018, 52, 6, 657-664. <a href="https://dx.doi.org/10.4103/ortho.IJOrtho_579_16">https://dx.doi.org/10.4103/ortho.IJOrtho_579_16</a> .                                                                                                                      |
| #3229 | Piantoni 2018        | Piantoni, Lucas; Tello, Carlos A; Remondino, Rodrigo G; Bersusky, Ernesto S; Menendez, Celica; Ponce, Corina; Quintana, Susana; Hekier, Felisa; Francheri Wilson, Ida A; Galaretto, Eduardo; Noel, Mariano A. Quality of life and patient satisfaction in bracing treatment of adolescent idiopathic scoliosis. <i>Scoliosis and spinal disorders</i> , 2018, 13, 101675716, 26. <a href="https://dx.doi.org/10.1186/s13013-018-0172-0">https://dx.doi.org/10.1186/s13013-018-0172-0</a> .                                                                              |
| #3236 | Simony 2015          | Simony, Ane; Hansen, Emil Jesper; Carreon, Leah Y; Christensen, Steen Bach; Andersen, Mikkel Osterheden. Health-related quality-of-life in adolescent idiopathic scoliosis patients 25 years after treatment. <i>Scoliosis</i> , 2015, 10, 101271527, 22. <a href="https://dx.doi.org/10.1186/s13013-015-0045-8">https://dx.doi.org/10.1186/s13013-015-0045-8</a> .                                                                                                                                                                                                     |
| #3247 | Cheung 2016          | Cheung, Prudence Wing Hang; Wong, Carlos King Ho; Samartzis, Dino; Luk, Keith Dip Kei; Lam, Cindy Lo Kuen; Cheung, Kenneth Man Chee; Cheung, Jason Pui Yin. Psychometric validation of the EuroQoL 5-Dimension 5-Level (EQ-5D-5L) in Chinese patients with adolescent idiopathic scoliosis. <i>Scoliosis and spinal disorders</i> , 2016, 11, 101675716, 19. <a href="https://dx.doi.org/10.1186/s13013-016-0083-x">https://dx.doi.org/10.1186/s13013-016-0083-x</a> .                                                                                                  |
| #3254 | Scaramuzzo 2019      | Scaramuzzo, Laura; Giudici, Fabrizio; Archetti, Marino; Minoia, Leone; Zagra, Antonino; Bongetta, Daniele. Clinical Relevance of Preoperative MRI in Adolescent Idiopathic Scoliosis: Is Hydromyelia a Predictive Factor of Intraoperative Electrophysiological Monitoring Alterations?. <i>Clinical spine surgery</i> , 2019, 32, 4, E183-E187. <a href="https://dx.doi.org/10.1097/BSD.0000000000000820">https://dx.doi.org/10.1097/BSD.0000000000000820</a> .                                                                                                        |
| #3259 | Kontodimopoulos 2018 | Kontodimopoulos, Nick; Damianou, Konstantia; Stamatopoulou, Eleni; Kalampokis, Anastasios; Loukos, Ioannis. Children's and parents' perspectives of health-related quality of life in newly diagnosed adolescent idiopathic scoliosis. <i>Journal of orthopaedics</i> , 2018, 15, 2, 319-323. <a href="https://dx.doi.org/10.1016/j.jor.2018.02.003">https://dx.doi.org/10.1016/j.jor.2018.02.003</a> .                                                                                                                                                                 |

|       |                 |                                                                                                                                                                                                                                                                                                                                                                                                                                                                                                                                                                                                                                                                                                            |
|-------|-----------------|------------------------------------------------------------------------------------------------------------------------------------------------------------------------------------------------------------------------------------------------------------------------------------------------------------------------------------------------------------------------------------------------------------------------------------------------------------------------------------------------------------------------------------------------------------------------------------------------------------------------------------------------------------------------------------------------------------|
| #3270 | Burger 2019     | Burger, Marlette; Coetzee, Wilna; du Plessis, Lenka Z; Geldenhuys, Larissa; Joubert, Francois; Myburgh, Elzanne; van Rooyen, Chante; Vermeulen, Nicol. The effectiveness of Schroth exercises in adolescents with idiopathic scoliosis: A systematic review and meta-analysis. The South African journal of physiotherapy, 2019, 75, 1, 904. <a href="https://dx.doi.org/10.4102/sajp.v75i1.904">https://dx.doi.org/10.4102/sajp.v75i1.904</a> .                                                                                                                                                                                                                                                           |
| #3274 | Mac-Thiong 2019 | Mac-Thiong, Jean-Marc; Remondino, Rodrigo; Joncas, J; Parent, Stefan; Labelle, Hubert. Long-term follow-up after surgical treatment of adolescent idiopathic scoliosis using high-density pedicle screw constructs: Is 5-year routine visit required?. European spine journal : official publication of the European Spine Society, the European Spinal Deformity Society, and the European Section of the Cervical Spine Research Society, 2019, 28, 6, 1296-1300. <a href="https://dx.doi.org/10.1007/s00586-019-05887-5">https://dx.doi.org/10.1007/s00586-019-05887-5</a> .                                                                                                                            |
| #3288 | Ishikawa 2019   | Ishikawa, Yoshinori; Miyakoshi, Naohisa; Kobayashi, Takashi; Abe, Toshiki; Kijima, Hiroaki; Abe, Eiji; Shimada, Yoichi. Activities of daily living and patient satisfaction after long fusion for adult spinal deformity: a retrospective study. European spine journal : official publication of the European Spine Society, the European Spinal Deformity Society, and the European Section of the Cervical Spine Research Society, 2019, 28, 7, 1670-1677. <a href="https://dx.doi.org/10.1007/s00586-019-05893-7">https://dx.doi.org/10.1007/s00586-019-05893-7</a> .                                                                                                                                  |
| #3289 | Fujishiro 2019  | Fujishiro, Takashi; Boissiere, Louis; Lawley, Derek Thomas; Larrieu, Daniel; Gille, Olivier; Vital, Jean-Marc; Pellise, Ferran; Perez-Grueso, Francisco Javier Sanchez; Kleinstuck, Frank; Acaroglu, Emre; Alanay, Ahmet; Obeid, Ibrahim; European Spine Study Group, ESSG. Adult spinal deformity surgical decision-making score : Part 1: development and validation of a scoring system to guide the selection of treatment modalities for patients below 40 years with adult spinal deformity. European spine journal : official publication of the European Spine Society, the European Spinal Deformity Society, and the European Section of the Cervical Spine Research Society, 2019, 28, 7, 1652- |
| #3294 | Uehara 2019     | Uehara, Masashi; Takahashi, Jun; Ikegami, Shota; Kuraishi, Shugo; Futatsugi, Toshimasa; Oba, Hiroki; Takizawa, Takashi; Munakata, Ryo; Koseki, Michihiko; Kato, Hiroyuki. Correlation of Lower Instrumented Vertebra With Spinal Mobility and Health-related Quality of Life After Posterior Spinal Fusion for Adolescent Idiopathic Scoliosis. Clinical spine surgery, 2019, 32, 7, E326-E329. <a href="https://dx.doi.org/10.1097/BSD.0000000000000794">https://dx.doi.org/10.1097/BSD.0000000000000794</a> .                                                                                                                                                                                            |
| #3314 | Ames 2019       | Ames, Christopher P; Smith, Justin S; Pellise, Ferran; Kelly, Michael; Gum, Jeffrey L; Alanay, Ahmet; Acaroglu, Emre; Perez-Grueso, Francisco Javier Sanchez; Kleinstuck, Frank S; Obeid, Ibrahim; Vila-Casademunt, Alba; Shaffrey, Christopher I Jr; Burton, Douglas C; Lafage, Virginie; Schwab, Frank J; Shaffrey, Christopher I Sr; Bess, Shay; Serra-Burriel, Miquel; European Spine Study Group; International Spine Study Group. Development of predictive models for all individual questions of SRS-22R after adult spinal deformity surgery: a step toward individualized medicine. European spine journal : official publication of the European Spine Society, the European Spinal Deformity   |
| #3315 | Zhang 2019      | Zhang, Yuhao; Li, Xingwei. Treatment of bracing for adolescent idiopathic scoliosis patients: a meta-analysis. European spine journal : official publication of the European Spine Society, the European Spinal Deformity Society, and the European Section of the Cervical Spine Research Society, 2019, 28, 9, 2012-2019. <a href="https://dx.doi.org/10.1007/s00586-019-06075-1">https://dx.doi.org/10.1007/s00586-019-06075-1</a> .                                                                                                                                                                                                                                                                    |
| #3320 | Zhou 2019       | Zhou, Siyu; Li, Wei; Su, Tong; Du, Chengbo; Wang, Wei; Xu, Fei; Sun, Zhuoran; Li, Weishi. Does lumbar lordosis minus thoracic kyphosis predict the clinical outcome of patients with adult degenerative scoliosis?. Journal of orthopaedic surgery and research, 2019, 14, 1, 290. <a href="https://dx.doi.org/10.1186/s13018-019-1339-y">https://dx.doi.org/10.1186/s13018-019-1339-y</a> .                                                                                                                                                                                                                                                                                                               |

|       |                |                                                                                                                                                                                                                                                                                                                                                                                                                                                                    |
|-------|----------------|--------------------------------------------------------------------------------------------------------------------------------------------------------------------------------------------------------------------------------------------------------------------------------------------------------------------------------------------------------------------------------------------------------------------------------------------------------------------|
| #3324 | Nazemi 2018    | Nazemi, Alireza K; Gowd, Anirudh K; Vaccaro, Alexander R; Carmouche, Jonathan J; Behrend, Caleb J. Unilateral S2 alar-iliac screws for spinopelvic fixation. Surgical neurology international, 2018, 9, 101535836, 75. <a href="https://dx.doi.org/10.4103/sni.sni_460_17">https://dx.doi.org/10.4103/sni.sni_460_17</a> .                                                                                                                                         |
| #3330 | Karabulut 2019 | Karabulut, Cem; Ayhan, Selim; Yuksel, Selcen; Nabiyeu, Vugar; Vila-Casademunt, Alba; Pellise, Ferran; Alanay, Ahmet; Perez-Grueso, Francisco Javier Sanchez; Kleinstuck, Frank; Obeid, Ibrahim; Acaroglu, Emre; EUROPEAN SPINE STUDY GROUP. Adult Spinal Deformity Over 70 Years of Age: A 2-Year Follow-Up Study. International journal of spine surgery, 2019, 13, 4, 336-344. <a href="https://dx.doi.org/10.14444/6046">https://dx.doi.org/10.14444/6046</a> . |
| #3335 | Katz 2019      | Katz, Austen D; Singh, Hardeep; Greenwood, Matthew; Cote, Mark; Moss, Isaac L. Clinical and Radiographic Evaluation of Multilevel Lateral Lumbar Interbody Fusion in Adult Degenerative Scoliosis. Clinical spine surgery, 2019, 32, 8, E386-E396. <a href="https://dx.doi.org/10.1097/BSD.0000000000000812">https://dx.doi.org/10.1097/BSD.0000000000000812</a> .                                                                                                 |
| #3343 | Min 2018       | Min, Kan; Jud, Lukas; Farshad, Mazda. Dual Sequential Short Anterior Correction in Double Major Adolescent Idiopathic Scoliosis. Spine deformity, 2018, 6, 5, 545-551. <a href="https://dx.doi.org/10.1016/j.jspd.2018.01.009">https://dx.doi.org/10.1016/j.jspd.2018.01.009</a> .                                                                                                                                                                                 |
| #3346 | Soliman 2018   | Soliman, Hany Abdel Gawwad. Health-related Quality of Life and Body Image Disturbance of Adolescents With Severe Untreated Idiopathic Early-onset Scoliosis in a Developing Country. Spine, 2018, 43, 22, 1566-1571. <a href="https://dx.doi.org/10.1097/BRS.0000000000002686">https://dx.doi.org/10.1097/BRS.0000000000002686</a> .                                                                                                                               |
| #3347 | Thielsch 2018  | Thielsch, Meinold T; Wetterkamp, Mark; Boertz, Patrick; Gosheger, Georg; Schulte, Tobias L. Reliability and validity of the Spinal Appearance Questionnaire (SAQ) and the Trunk Appearance Perception Scale (TAPS). Journal of orthopaedic surgery and research, 2018, 13, 1, 274. <a href="https://dx.doi.org/10.1186/s13018-018-0980-1">https://dx.doi.org/10.1186/s13018-018-0980-1</a> .                                                                       |
| #3356 | Inami 2018     | Inami, Satoshi; Moridaira, Hiroshi; Takeuchi, Daisaku; Ueda, Haruki; Shiba, Yo; Asano, Futoshi; Aoki, Hiromichi; Taneichi, Hiroshi. Postoperative Status of Global Sagittal Alignment With Compensation in Adult Spinal Deformity. Spine, 2018, 43, 23, 1631-1637. <a href="https://dx.doi.org/10.1097/BRS.0000000000002693">https://dx.doi.org/10.1097/BRS.0000000000002693</a> .                                                                                 |
| #3357 | Haddas 2018    | Haddas, Ram; Lieberman, Isador H; Block, Andrew. The Relationship Between Fear-Avoidance and Neuromuscular Measures of Function in Patients With Adult Degenerative Scoliosis. Spine, 2018, 43, 23, E1412-E1421. <a href="https://dx.doi.org/10.1097/BRS.0000000000002719">https://dx.doi.org/10.1097/BRS.0000000000002719</a> .                                                                                                                                   |

|       |                 |                                                                                                                                                                                                                                                                                                                                                                                                                                                                                                                                                                                                     |
|-------|-----------------|-----------------------------------------------------------------------------------------------------------------------------------------------------------------------------------------------------------------------------------------------------------------------------------------------------------------------------------------------------------------------------------------------------------------------------------------------------------------------------------------------------------------------------------------------------------------------------------------------------|
| #3366 | Meng 2017       | Meng, Zeng-Dong; Li, Tian-Peng; Xie, Xu-Hua; Luo, Chong; Lian, Xing-Ye; Wang, Ze-Yu. Quality of life in adolescent patients with idiopathic scoliosis after brace treatment: A meta-analysis. <i>Medicine</i> , 2017, 96, 19, e6828. <a href="https://dx.doi.org/10.1097/MD.0000000000006828">https://dx.doi.org/10.1097/MD.0000000000006828</a> .                                                                                                                                                                                                                                                  |
| #3368 | Misterska 2019  | Misterska, Ewa; Glowacki, Jakub; Kolban, Maciej. Does rigid spinal orthosis carry more psychosocial implications than the flexible brace in AIS patients? A cross-sectional study. <i>Journal of back and musculoskeletal rehabilitation</i> , 2019, 32, 1, 101-109. <a href="https://dx.doi.org/10.3233/BMR-181121">https://dx.doi.org/10.3233/BMR-181121</a> .                                                                                                                                                                                                                                    |
| #3375 | Cho 2018        | Cho, Jae Hwan; Hwang, Chang Ju; Choi, Young Hyun; Lee, Dong-Ho; Lee, Choon Sung. Cervical sagittal alignment in patients with adolescent idiopathic scoliosis: is it corrected by surgery?. <i>Journal of neurosurgery. Pediatrics</i> , 2018, 21, 3, 292-301. <a href="https://dx.doi.org/10.3171/2017.8.PEDS17357">https://dx.doi.org/10.3171/2017.8.PEDS17357</a> .                                                                                                                                                                                                                              |
| #3381 | Lendzion 2018   | Lendzion, Maciej; Lukaszewicz, Ewa; Was, Jakub; Czaprowski, Dariusz. Self-evaluation of Trunk Aesthetics in Conservatively Treated Children and Adolescents with Idiopathic Scoliosis. <i>Ortopedia, traumatologia, rehabilitacja</i> , 2018, 20, 5, 371-382. <a href="https://dx.doi.org/10.5604/01.3001.0012.8273">https://dx.doi.org/10.5604/01.3001.0012.8273</a> .                                                                                                                                                                                                                             |
| #3388 | Banno 2019      | Banno, Tomohiro; Arima, Hideyuki; Hasegawa, Tomohiko; Yamato, Yu; Togawa, Daisuke; Yoshida, Go; Yasuda, Tatsuya; Oe, Shin; Mihara, Yuki; Ushirozako, Hiroki; Matsuyama, Yukihiro. The Effect of Paravertebral Muscle on the Maintenance of Upright Posture in Patients With Adult Spinal Deformity. <i>Spine deformity</i> , 2019, 7, 1, 125-131. <a href="https://dx.doi.org/10.1016/j.jspd.2018.06.008">https://dx.doi.org/10.1016/j.jspd.2018.06.008</a> .                                                                                                                                       |
| #3394 | Lonner 2019     | Lonner, Baron S; Ren, Yuan; Bess, Shay; Kelly, Michael; Kim, Han Jo; Yaszay, Burt; Lafage, Virginie; Marks, Michelle; Miyajima, Firoz; Shaffrey, Christopher I; Newton, Peter O. Surgery for the Adolescent Idiopathic Scoliosis Patients After Skeletal Maturity: Early Versus Late Surgery. <i>Spine deformity</i> , 2019, 7, 1, 84-92. <a href="https://dx.doi.org/10.1016/j.jspd.2018.05.012">https://dx.doi.org/10.1016/j.jspd.2018.05.012</a> .                                                                                                                                               |
| #3396 | Yeramaneni 2018 | Yeramaneni, Samrat; Ames, Christopher P; Bess, Shay; Burton, Doug; Smith, Justin S; Glassman, Steven; Gum, Jeffrey L; Carreon, Leah; Jain, Amit; Zygorakis, Corinna; Avramis, Ioannis; Hostin, Richard; International Spine Study Group. Center variation in episode-of-care costs for adult spinal deformity surgery: results from a prospective, multicenter database. <i>The spine journal : official journal of the North American Spine Society</i> , 2018, 18, 10, 1829-1836. <a href="https://dx.doi.org/10.1016/j.spinee.2018.03.012">https://dx.doi.org/10.1016/j.spinee.2018.03.012</a> . |
| #3411 | Oe 2019         | Oe, Shin; Togawa, Daisuke; Yamato, Yu; Yoshida, Go; Hasegawa, Tomohiko; Kobayashi, Sho; Yasuda, Tatsuya; Banno, Tomohiro; Arima, Hideyuki; Mihara, Yuki; Ushirozako, Hiroki; Matsuyama, Yukihiro. Comparison of Postoperative Outcomes According to Compensatory Changes of the Thoracic Spine Among Patients With a T1 Slope More Than 40degree. <i>Spine</i> , 2019, 44, 8, 579-587. <a href="https://dx.doi.org/10.1097/BRS.0000000000002880">https://dx.doi.org/10.1097/BRS.0000000000002880</a> .                                                                                              |

- #3415 Riley 2018 Riley, Max S; Lenke, Lawrence G; Chapman, Todd M Jr; Sides, Brenda A; Blanke, Kathy M; Kelly, Michael P. Clinical and Radiographic Outcomes After Posterior Vertebral Column Resection for Severe Spinal Deformity with Five-Year Follow-up. The Journal of bone and joint surgery. American volume, 2018, 100, 5, 396-405. <https://dx.doi.org/10.2106/JBJS.17.00597>.
- #3416 Faraj 2018 Faraj, Sayf S A; De Kleuver, Marinus; Vila-Casademunt, Alba; Holewijn, Roderick M; Obeid, Ibrahim; Acaroglu, Emre; Alanay, Ahmet; Kleinstuck, Frank; Perez-Grueso, Francisco S; Pellise, Ferran. Sagittal radiographic parameters demonstrate weak correlations with pretreatment patient-reported health-related quality of life measures in symptomatic de novo degenerative lumbar scoliosis: a European multicenter analysis. Journal of neurosurgery. Spine, 2018, 28, 6, 573-580. <https://dx.doi.org/10.3171/2017.8.SPINE161266>.
- #3418 Ohashi 2019 Ohashi, Masayuki; Watanabe, Kei; Hirano, Toru; Hasegawa, Kazuhiro; Katsumi, Keiichi; Shoji, Hirokazu; Mizouchi, Tatsuki; Takahashi, Ikuko; Endo, Naoto. The Natural Course of Compensatory Lumbar Curves in Nonoperated Patients With Thoracic Adolescent Idiopathic Scoliosis. Spine, 2019, 44, 2, E89-E98. <https://dx.doi.org/10.1097/BRS.0000000000002779>.
- #3424 Raad 2018 Raad, Muneer; Neuman, Brian J; Jain, Amit; Hassanizadeh, Hamid; Passias, Peter G; Klineberg, Eric; Mundis, Gregory M; Protopsaltis, Themistocles S; Miller, Emily K; Smith, Justin S; Lafage, Virginie; Hamilton, D Kojo; Bess, Shay; Kebaish, Khaled M; Sciubba, Daniel M; International Spine Study Group. The use of patient-reported preoperative activity levels as a stratification tool for short-term and long-term outcomes in patients with adult spinal deformity. Journal of neurosurgery. Spine, 2018, 29, 1, 68-74. <https://dx.doi.org/10.3171/2017.10.SPINE17830>.
- #3446 Schlenzka 2019 Schlenzka, Dietrich; Ylikoski, Mauno; Poussa, Mikko; Yrjonen, Timo; Ristolainen, Leena. Concomitant low-grade isthmic L5-spondylolisthesis does not affect the course of adolescent idiopathic scoliosis. European spine journal : official publication of the European Spine Society, the European Spinal Deformity Society, and the European Section of the Cervical Spine Research Society, 2019, 28, 12, 3053-3065. <https://dx.doi.org/10.1007/s00586-019-06089-9>.
- #3449 Zhang 2019 Zhang, Hao-Cong; Yu, Hai-Long; Yang, Hui-Feng; Sun, Peng-Fei; Wu, Hao-Tian; Zhan, Yang; Wang, Zheng; Xiang, Liang-Bi. Short-segment decompression/fusion versus long-segment decompression/fusion and osteotomy for Lenke-Silva type VI adult degenerative scoliosis. Chinese medical journal, 2019, 132, 21, 2543-2549. <https://dx.doi.org/10.1097/CM9.0000000000000474>.
- #3453 Teles 2019 Teles, Alisson R; Oca, Don Daniel; Bin Shebreen, Abdulaziz; Tice, Andrew; Saran, Neil; Ouellet, Jean A; Ferland, Catherine E. Evidence of impaired pain modulation in adolescents with idiopathic scoliosis and chronic back pain. The spine journal : official journal of the North American Spine Society, 2019, 19, 4, 677-686. <https://dx.doi.org/10.1016/j.spinee.2018.10.009>.
- #3455 Yagi 2019 Yagi, Mitsuru; Hosogane, Naobumi; Fujita, Nobuyuki; Okada, Eijiro; Suzuki, Satoshi; Tsuji, Osahiko; Nagoshi, Narihito; Asazuma, Takashi; Tsuji, Takashi; Nakamura, Masaya; Matsumoto, Morio; Watanabe, Kota. Surgical risk stratification based on preoperative risk factors in adult spinal deformity. The spine journal : official journal of the North American Spine Society, 2019, 19, 5, 816-826. <https://dx.doi.org/10.1016/j.spinee.2018.12.007>.

|       |               |                                                                                                                                                                                                                                                                                                                                                                                                                                                                                                                                                                                                                                  |
|-------|---------------|----------------------------------------------------------------------------------------------------------------------------------------------------------------------------------------------------------------------------------------------------------------------------------------------------------------------------------------------------------------------------------------------------------------------------------------------------------------------------------------------------------------------------------------------------------------------------------------------------------------------------------|
| #3458 | Scott 2020    | Scott, Eric L; Foxen-Craft, Emily; Caird, Michelle; Philliben, Riley; deSebour, Trevor; Currier, Emily; Voepel-Lewis, Terri. Parental Proxy PROMIS Pain Interference Scores are Only Modestly Concordant With Their Child's Scores: An Effect of Child Catastrophizing. The Clinical journal of pain, 2020, 36, 1, 44568. <a href="https://dx.doi.org/10.1097/AJP.0000000000000772">https://dx.doi.org/10.1097/AJP.0000000000000772</a> .                                                                                                                                                                                        |
| #3467 | Wang 2019     | Wang, Hai; Li, Tao; Yuan, Wangshu; Zhang, Zheping; Wei, Jing; Qiu, Guixing; Shen, Jianxiong. Mental health of patients with adolescent idiopathic scoliosis and their parents in China: a cross-sectional survey. BMC psychiatry, 2019, 19, 1, 147. <a href="https://dx.doi.org/10.1186/s12888-019-2128-1">https://dx.doi.org/10.1186/s12888-019-2128-1</a> .                                                                                                                                                                                                                                                                    |
| #3470 | Khoshhal 2019 | Khoshhal, Yalda; Jalali, Maryam; Babaee, Taher; Ghandhari, Hassan; Gum, Jeffrey L. The Effect of Bracing on Spinopelvic Rotation and Psychosocial Parameters in Adolescents with Idiopathic Scoliosis. Asian spine journal, 2019, 13, 6, 1028-1035. <a href="https://dx.doi.org/10.31616/asj.2018.0307">https://dx.doi.org/10.31616/asj.2018.0307</a> .                                                                                                                                                                                                                                                                          |
| #3479 | Xu 2019       | Xu, Zhengkuan; Li, Fangcai; Chen, Gang; Chen, Qixin. Reassessment System and Staged Surgical Strategy with Minimally Invasive Techniques for Treatment of Severe Adult Spinal Deformities. World neurosurgery, 2019, 126, 101528275, e860-e868. <a href="https://dx.doi.org/10.1016/j.wneu.2019.03.001">https://dx.doi.org/10.1016/j.wneu.2019.03.001</a> .                                                                                                                                                                                                                                                                      |
| #3483 | Anand 2019    | Anand, Neel; Alayan, Alisa; Agrawal, Aniruddh; Kahwaty, Sheila; Nomoto, Edward; Khandehroo, Babak. Analysis of Spino-Pelvic Parameters and Segmental Lordosis with L5-S1 Oblique Lateral Interbody Fusion at the Bottom of a Long Construct in Circumferential Minimally Invasive Surgical Correction of Adult Spinal Deformity. World neurosurgery, 2019, 130, 101528275, e1077-e1083. <a href="https://dx.doi.org/10.1016/j.wneu.2019.07.091">https://dx.doi.org/10.1016/j.wneu.2019.07.091</a> .                                                                                                                              |
| #3484 | Watanabe 2020 | Watanabe, Yuh; Yoshida, Go; Hasegawa, Tomohiko; Yamato, Yu; Togawa, Daisuke; Banno, Tomohiro; Oe, Shin; Arima, Hideyuki; Ushirozako, Hiroki; Yamada, Tomohiro; Murata, Hideyuki; Matsuyama, Yukihiro. Effect of Perioperative Mental Status on Health-related Quality of Life in Patients With Adult Spinal Deformities. Spine, 2020, 45, 2, E76-E82. <a href="https://dx.doi.org/10.1097/BRS.0000000000003186">https://dx.doi.org/10.1097/BRS.0000000000003186</a> .                                                                                                                                                            |
| #3485 | Durand 2019   | Durand, Wesley IV; Daniels, Alan H; Hamilton, David K; Passias, Peter G; Kim, Han Jo; Protosaitis, I nemistocies; Larage, virginie; Smith, Justin S; Shaffrey, Christopher; Gupta, Munish; Kelly, Michael P; Klineberg, Eric; Schwab, Frank; Burton, Doug; Bess, Shay; Ames, Christopher; Hart, Robert; International Spine Study Group. Younger Patients Are Differentially Affected by Stiffness-Related Disability Following Adult Spinal Deformity Surgery. World neurosurgery, 2019, 132, 101528275, e297-e304. <a href="https://dx.doi.org/10.1016/j.wneu.2019.08.169">https://dx.doi.org/10.1016/j.wneu.2019.08.169</a> . |
| #3486 | Watanabe 2020 | Watanabe, Kei; Ohashi, Masayuki; Hirano, Toru; Katsumi, Keiichi; Mizouchi, Tatsuki; Tashi, Hideki; Minato, Keitaro; Hasegawa, Kazuhiro; Endo, Naoto. Health-Related Quality of Life in Nonoperated Patients With Adolescent Idiopathic Scoliosis in the Middle Years: A Mean 25-Year Follow-up Study. Spine, 2020, 45, 2, E83-E89. <a href="https://dx.doi.org/10.1097/BRS.0000000000003216">https://dx.doi.org/10.1097/BRS.0000000000003216</a> .                                                                                                                                                                               |



|       |               |                                                                                                                                                                                                                                                                                                                                                                                                                                                                                                                                                                        |
|-------|---------------|------------------------------------------------------------------------------------------------------------------------------------------------------------------------------------------------------------------------------------------------------------------------------------------------------------------------------------------------------------------------------------------------------------------------------------------------------------------------------------------------------------------------------------------------------------------------|
| #3491 | Wong 2019     | Wong, Arnold Y L; Samartzis, Dino; Cheung, Prudence W H; Cheung, Jason Pui Yin. How Common Is Back Pain and What Biopsychosocial Factors Are Associated With Back Pain in Patients With Adolescent Idiopathic Scoliosis?. <i>Clinical orthopaedics and related research</i> , 2019, 477, 4, 676-686. <a href="https://dx.doi.org/10.1097/CORR.0000000000000569">https://dx.doi.org/10.1097/CORR.0000000000000569</a> .                                                                                                                                                 |
| #3493 | Helenius 2019 | Helenius, Linda; Diarbakerli, Elias; Grauers, Anna; Lastikka, Markus; Oksanen, Hanna; Pajulo, Olli; Loyttyniemi, Eliisa; Manner, Tuula; Gerdhem, Paul; Helenius, Ilkka. Back Pain and Quality of Life After Surgical Treatment for Adolescent Idiopathic Scoliosis at 5-Year Follow-up: Comparison with Healthy Controls and Patients with Untreated Idiopathic Scoliosis. <i>The Journal of bone and joint surgery. American volume</i> , 2019, 101, 16, 1460-1466. <a href="https://dx.doi.org/10.2106/JBJS.18.01370">https://dx.doi.org/10.2106/JBJS.18.01370</a> . |
| #3496 | Park 2013     | Park, Justin J; Carreon, Leah Y; Glassman, Steven D. Adult Lumbar Degenerative Scoliosis 40degree or Less: Outcomes of Surgical Treatment With Minimum 2-Year Follow-up. <i>Spine deformity</i> , 2013, 1, 3, 211-216. <a href="https://dx.doi.org/10.1016/j.jspd.2013.03.003">https://dx.doi.org/10.1016/j.jspd.2013.03.003</a> .                                                                                                                                                                                                                                     |
| #3502 | Glassman 2013 | Glassman, Steven D; Sucato, Daniel J; Carreon, Leah Y; Sanders, James O; Vitale, Michael G; Lenke, Lawrence G. Does Thoracic Hypokyphosis Matter in Lenke Type 1 Adolescent Idiopathic Scoliosis?. <i>Spine deformity</i> , 2013, 1, 1, 40-45. <a href="https://dx.doi.org/10.1016/j.jspd.2012.09.001">https://dx.doi.org/10.1016/j.jspd.2012.09.001</a> .                                                                                                                                                                                                             |
| #3512 | Ledonio 2013  | Ledonio, Charles G T; Polly, David W Jr; Crawford, Charles H 3rd; Duval, Sue; Smith, Justin S; Buchowski, Jacob M; Yson, Sharon C; Larson, A Noelle; Sembrano, Jonathan N; Santos, Edward R G. Adult Degenerative Scoliosis Surgical Outcomes: A Systematic Review and Meta-analysis. <i>Spine deformity</i> , 2013, 1, 4, 248-258. <a href="https://dx.doi.org/10.1016/j.jspd.2013.05.001">https://dx.doi.org/10.1016/j.jspd.2013.05.001</a> .                                                                                                                        |
| #3514 | McCarthy 2013 | McCarthy, Ian; Hostin, Richard; O'Brien, Michael; Fleming, Neil; Ogola, Gerald; Kudyakov, Rustam; Richter, Kathleen; Saigal, Rajiv; Berven, Sigurd; Deviren, Vedat; Ames, Christopher; International Spine Study Group. Cost-Effectiveness of Surgical Treatment for Adult Spinal Deformity: A Comparison of Dollars per Quality of Life Improvement Across Health Domains. <i>Spine deformity</i> , 2013, 1, 4, 293-298. <a href="https://dx.doi.org/10.1016/j.jspd.2013.05.007">https://dx.doi.org/10.1016/j.jspd.2013.05.007</a> .                                  |
| #3517 | Brewer 2013   | Brewer, Paul; Berryman, Fiona; Baker, De; Pynsent, Paul; Gardner, Adrian. Influence of Cobb Angle and ISIS2 Surface Topography Volumetric Asymmetry on Scoliosis Research Society-22 Outcome Scores in Scoliosis. <i>Spine deformity</i> , 2013, 1, 6, 452-457. <a href="https://dx.doi.org/10.1016/j.jspd.2013.07.012">https://dx.doi.org/10.1016/j.jspd.2013.07.012</a> .                                                                                                                                                                                            |
| #3519 | Mesfin 2013   | Mesfin, Addisu; Lenke, Lawrence G; Bridwell, Keith H; Jupitz, Jennifer M; Akhtar, Usman; Fogelson, Jeremy L; Hershman, Stuart; Kim, Han Jo; Koester, Linda A. Weight Change and Clinical Outcomes Following Adult Spinal Deformity Surgery in Overweight and Obese Patients. <i>Spine deformity</i> , 2013, 1, 5, 377-381. <a href="https://dx.doi.org/10.1016/j.jspd.2013.07.002">https://dx.doi.org/10.1016/j.jspd.2013.07.002</a> .                                                                                                                                 |

|       |                    |                                                                                                                                                                                                                                                                                                                                                                                                                                                                                                                                                                    |
|-------|--------------------|--------------------------------------------------------------------------------------------------------------------------------------------------------------------------------------------------------------------------------------------------------------------------------------------------------------------------------------------------------------------------------------------------------------------------------------------------------------------------------------------------------------------------------------------------------------------|
| #3529 | Bastrom 2019       | Bastrom, Tracey P; Bartley, Carrie E; Newton, Peter O; Harms Study Group. Patient-Reported SRS-24 Outcomes Scores After Surgery for Adolescent Idiopathic Scoliosis Have Improved Since the New Millennium. <i>Spine deformity</i> , 2019, 7, 6, 917-922. <a href="https://dx.doi.org/10.1016/j.jspd.2019.01.007">https://dx.doi.org/10.1016/j.jspd.2019.01.007</a> .                                                                                                                                                                                              |
| #3558 | Dunn 2018          | Dunn, John; Henrikson, Nora B; Morrison, Caitlin C; Nguyen, Matt; Blasi, Paula R; Lin, Jennifer S. , 2018, , , . .                                                                                                                                                                                                                                                                                                                                                                                                                                                 |
| #3582 | Glowacki 2013      | Glowacki, Maciej; Misterska, Ewa; Adamczyk, Katarzyna; Latuszewska, Joanna. Prospective Assessment of Scoliosis-Related Anxiety and Impression of Trunk Deformity in Female Adolescents Under Brace Treatment. <i>Journal of developmental and physical disabilities</i> , 2013, 25, 2, 203-220. .                                                                                                                                                                                                                                                                 |
| #3583 | Glowacki 2013      | Glowacki, Maciej; Misterska, Ewa; Adamczyk, Katarzyna; Latuszewska, Joanna. Changes in Scoliosis Patient and Parental Assessment of Mental Health in the Course of Cheneau Brace Treatment Based on the Strengths and Difficulties Questionnaire. <i>Journal of developmental and physical disabilities</i> , 2013, 25, 3, 325-342. .                                                                                                                                                                                                                              |
| #3585 | Misterska 2014     | Misterska, Ewa; Glowacki, Maciej; Adamczyk, Katarzyna; Jankowski, Roman. Patients' and Parents' Perceptions of Appearance in Scoliosis Treated with a Brace: A Cross-Sectional Analysis. <i>Journal of child and family studies</i> , 2014, 23, 7, 1163-1171. .                                                                                                                                                                                                                                                                                                    |
| #3592 | RezaeiMotlagh 2018 | Rezaei Motlagh, Fazel; Pejam, Hamid; Babaee, Taher; Saeedi, Hassan; Hedayati, Zahra; Kamali, Mohammad. Persian adaptation of the Bad Sobernheim stress questionnaire for adolescent with idiopathic scoliosis. <i>Disability and rehabilitation</i> , 2018, , 9207179, a8i, 44566. <a href="https://dx.doi.org/10.1080/09638288.2018.1503728">https://dx.doi.org/10.1080/09638288.2018.1503728</a> .                                                                                                                                                               |
| #3601 | Kelly 2019         | Kelly, Michael P; Kallen, Michael A; Shaffrey, Christopher I; Smith, Justin S; Burton, Douglas C; Ames, Christopher P; Lafage, Virginie; Schwab, Frank J; Kim, Han Jo; Klineberg, Eric O; Bess, Shay; International Spine Study Group. Examining the Patient-Reported Outcomes Measurement Information System versus the Scoliosis Research Society-22r in adult spinal deformity. <i>Journal of neurosurgery. Spine</i> , 2019, , 101223545, 44567. <a href="https://dx.doi.org/10.3171/2018.11.SPINE181014">https://dx.doi.org/10.3171/2018.11.SPINE181014</a> . |
| #3606 | Aghdasi 2019       | Aghdasi, Bayan; Bachmann, Keith R; Clark, DesRaj; Koldenhoven, Rachel; Sultan, Mark; George, Jose; Singla, Anuj; Abel, Mark F. Patient-reported Outcomes Following Surgical Intervention for Adolescent Idiopathic Scoliosis: A Systematic Review and Meta-Analysis. <i>Clinical spine surgery</i> , 2019, , 101675083, . <a href="https://dx.doi.org/10.1097/BSD.0000000000000822">https://dx.doi.org/10.1097/BSD.0000000000000822</a> .                                                                                                                          |

- #3607 Ushirozako 2019 Ushirozako, Hiroki; Yoshida, Go; Hasegawa, Tomohiko; Yamato, Yu; Yasuda, Tatsuya; Banno, Tomohiro; Arima, Hideyuki; Oe, Shin; Mihara, Yuki; Yamada, Tomohiro; Ojima, Toshiyuki; Togawa, Daisuke; Matsuyama, Yukihiro. Impact of shift to the concave side of the C7-center sacral vertical line on de novo degenerative lumbar scoliosis progression in elderly volunteers. Journal of orthopaedic science : official journal of the Japanese Orthopaedic Association, 2019, , c5t, 9604934, . <https://dx.doi.org/10.1016/j.jos.2019.03.007>.
- #3609 Sabou 2019 Sabou, Silviu; Lagaras, Apostolos; Verma, Rajat; Siddique, Irfan; Mohammad, Saeed. Comparative study of multilevel posterior interbody fusion plus anterior longitudinal ligament release versus classic multilevel posterior interbody fusion in the treatment of adult spinal deformities. Journal of neurosurgery. Spine, 2019, , 101223545, 44568. <https://dx.doi.org/10.3171/2019.1.SPINE18754>.
- #3613 Kyrola 2019 Kyrola, Kati; Hakkinen, Arja H; Ylinen, Jari; Repo, Jussi P. Further validation of the Scoliosis Research Society (SRS-30) questionnaire among adult patients with degenerative spinal disorder. Disability and rehabilitation, 2019, , 9207179, a8i, 44567. <https://dx.doi.org/10.1080/09638288.2019.1616327>.
- #3616 Yagi 2019 Yagi, Mitsuru; Fujita, Nobuyuki; Okada, Eijiro; Tsuji, Osahiko; Nagoshi, Narihito; Asazuma, Takashi; Nakamura, Masaya; Matsumoto, Morio; Watanabe, Kota. Clinical Outcomes, Complications, and Cost-effectiveness in Surgically Treated Adult Spinal Deformity Over 70 Years: A Propensity score-Matched Analysis. Clinical spine surgery, 2019, , 101675083, . <https://dx.doi.org/10.1097/BSD.0000000000000842>.
- #3618 Fedorak 2019 Fedorak, Graham T; Larkin, Kevin; Heflin, John A; Xu, Julie; Hung, Man. Pediatric PROMIS is Equivalent to SRS-22 in Assessing Health Status in Adolescent Idiopathic Scoliosis. Spine, 2019, , 7610646, uxx, 7610649, . <https://dx.doi.org/10.1097/BRS.00000000000003112>.
- #3620 Buell 2019 Buell, Thomas J; Chen, Ching-Jen; Nguyen, James H; Christiansen, Peter A; Murthy, Saikiran G; Buchholz, Avery L; Yen, Chun-Po; Shaffrey, Mark E; Shaffrey, Christopher I; Smith, Justin S. Surgical correction of severe adult lumbar scoliosis (major curves >= 75degree): retrospective analysis with minimum 2-year follow-up. Journal of neurosurgery. Spine, 2019, , 101223545, 44575. <https://dx.doi.org/10.3171/2019.3.SPINE1966>.
- #3633 Watanabe 2019 Watanabe, Kei; Ohashi, Masayuki; Hirano, Toru; Katsumi, Keiichi; Mizouchi, Tatsuki; Tashi, Hideki; Minato, Keitaro; Hasegawa, Kazuhiro; Endo, Naoto. Health-Related Quality of Life in Non-Operated Patients with Adolescent Idiopathic Scoliosis in the Middle Years: a Mean 25-Year Follow-up Study. Spine, 2019, , 7610646, uxx, 7610649, . <https://dx.doi.org/10.1097/BRS.00000000000003216>.
- #3647 Wibmer 2019 Wibmer, Christine; Protsenko, Pawel; Glig, Magdalena M; Leitner, Andreas; Speri, Matthias; Saraph, Vinay. Observational retrospective study on socio-economic and quality of life outcomes in 41 patients with adolescent idiopathic scoliosis 5 years after bracing combined with physiotherapeutic scoliosis-specific exercises (PSSE). European spine journal : official publication of the European Spine Society, the European Spinal Deformity Society, and the European Section of the Cervical Spine Research Society, 2019, 28, 3, 611-618. <https://dx.doi.org/10.1007/s00586-018-5746-2>.

|       |                |                                                                                                                                                                                                                                                                                                                                                                                                                                                                                               |
|-------|----------------|-----------------------------------------------------------------------------------------------------------------------------------------------------------------------------------------------------------------------------------------------------------------------------------------------------------------------------------------------------------------------------------------------------------------------------------------------------------------------------------------------|
| #3653 | Chan 2019      | Chan, Chris Yin Wei; Gani, Siti Mariam Abd; Lim, Min Yuen; Chiu, Chee Kidd; Kwan, Mun Keong. APSS-ASJ Best Clinical Research Award: Is There a Difference between Patients' and Parents' Perception of Physical Appearance in Adolescent Idiopathic Scoliosis?. Asian spine journal, 2019, 13, 2, 216-224. <a href="https://dx.doi.org/10.31616/asj.2018.0151">https://dx.doi.org/10.31616/asj.2018.0151</a> .                                                                                |
| #3656 | DeLaRocha 2014 | De La Rocha, Adriana; McClung, Anna; Sucato, Daniel J. Increased Body Mass Index Negatively Affects Patient Satisfaction After a Posterior Fusion and Instrumentation for Adolescent Idiopathic Scoliosis. Spine deformity, 2014, 2, 3, 208-213. <a href="https://dx.doi.org/10.1016/j.jspd.2013.12.005">https://dx.doi.org/10.1016/j.jspd.2013.12.005</a> .                                                                                                                                  |
| #3658 | Weber 2014     | Weber, Michael H; Mathew, Jacob E; Takemoto, Steven K; Na, Lumine H; Berven, Sigurd; Spinal Deformity Study Group. Postoperative Recovery Outcomes in Adult Scoliosis: A Prospective Multicenter Database With 5-Year Follow-Up. Spine deformity, 2014, 2, 3, 226-232. <a href="https://dx.doi.org/10.1016/j.jspd.2014.01.001">https://dx.doi.org/10.1016/j.jspd.2014.01.001</a> .                                                                                                            |
| #3659 | Chen 2013      | Chen, Antonia F; Bi, Wenzhu; Singhabahu, Dilrukshika; Londino, Joanne; Hohl, Justin; Ward, Maeve; Ward, W Timothy. Converting Scoliosis Research Society-24 to Scoliosis Research Society-22r in a Surgical-Range, Medical/Interventional Adolescent Idiopathic Scoliosis Patient Cohort. Spine deformity, 2013, 1, 2, 108-114. <a href="https://dx.doi.org/10.1016/j.jspd.2012.12.003">https://dx.doi.org/10.1016/j.jspd.2012.12.003</a> .                                                   |
| #3660 | Martin 2013    | Martin, Christopher T; Skolasky, Richard L; Mohamed, Ahmed S; Kebaish, Khaled M. Preliminary Results of the Effect of Prophylactic Vertebroplasty on the Incidence of Proximal Junctional Complications After Posterior Spinal Fusion to the Low Thoracic Spine. Spine deformity, 2013, 1, 2, 132-138. <a href="https://dx.doi.org/10.1016/j.jspd.2013.01.005">https://dx.doi.org/10.1016/j.jspd.2013.01.005</a> .                                                                            |
| #3664 | Brewer 2014    | Brewer, Paul; Berryman, Fiona; Baker, De; Pynsent, Paul; Gardner, Adrian. Analysis of the Scoliosis Research Society-22 Questionnaire Scores: Is There a Difference Between a Child and Parent and Does Physician Review Change That?. Spine deformity, 2014, 2, 1, 34-39. <a href="https://dx.doi.org/10.1016/j.jspd.2013.08.006">https://dx.doi.org/10.1016/j.jspd.2013.08.006</a> .                                                                                                        |
| #3671 | Lonner 2015    | Lonner, Baron S; Toombs, Courtney S; Husain, Qasim M; Sponseller, Paul; Shufflebarger, Harry; Shah, Suken A; Samdani, Amer F; Betz, Randal R; Cahill, Patrick J; Yaszay, Burt; Newton, Peter O. Body Mass Index in Adolescent Spinal Deformity: Comparison of Scheuermann's Kyphosis, Adolescent Idiopathic Scoliosis, and Normal Controls. Spine deformity, 2015, 3, 4, 318-326. <a href="https://dx.doi.org/10.1016/j.jspd.2015.02.004">https://dx.doi.org/10.1016/j.jspd.2015.02.004</a> . |
| #3689 | Larson 2019    | Larson, A Noelle; Baky, Fady; Ashraf, Ali; Baghdadi, Yaser M; Treder, Vickie; Polly, David W Jr; Yaszemski, Michael J. Minimum 20-Year Health-Related Quality of Life and Surgical Rates After the Treatment of Adolescent Idiopathic Scoliosis. Spine deformity, 2019, 7, 3, 417-427. <a href="https://dx.doi.org/10.1016/j.jspd.2018.09.003">https://dx.doi.org/10.1016/j.jspd.2018.09.003</a> .                                                                                            |

|       |                |                                                                                                                                                                                                                                                                                                                                                                                                                                                                                                                                                                                                                                                                                                              |
|-------|----------------|--------------------------------------------------------------------------------------------------------------------------------------------------------------------------------------------------------------------------------------------------------------------------------------------------------------------------------------------------------------------------------------------------------------------------------------------------------------------------------------------------------------------------------------------------------------------------------------------------------------------------------------------------------------------------------------------------------------|
| #3694 | Rezaee 2019    | Rezaee, Sedighe; Jalali, Maryam; Babaee, Taher; Kamali, Mohammad. Reliability and Concurrent Validity of a Culturally Adapted Persian Version of the Brace Questionnaire in Adolescents With Idiopathic Scoliosis. <i>Spine deformity</i> , 2019, 7, 4, 553-558. <a href="https://dx.doi.org/10.1016/j.jspd.2018.10.001">https://dx.doi.org/10.1016/j.jspd.2018.10.001</a> .                                                                                                                                                                                                                                                                                                                                 |
| #3695 | Diebo 2019     | Diebo, Bassel G; Segreto, Frank A; Solow, Maximillian; Messina, James C; Paltoo, Karen; Burekhovich, Steven A; Bloom, Lee R; Cautela, Frank S; Shah, Neil V; Passias, Peter G; Schwab, Frank J; Pasha, Saba; Lafage, Virginie; Paulino, Carl B. Adolescent Idiopathic Scoliosis Care in an Underserved Inner-City Population: Screening, Bracing, and Patient- and Parent-Reported Outcomes. <i>Spine deformity</i> , 2019, 7, 4, 559-564. <a href="https://dx.doi.org/10.1016/j.jspd.2018.11.014">https://dx.doi.org/10.1016/j.jspd.2018.11.014</a> .                                                                                                                                                       |
| #3701 | Ibaseta 2019   | Ibaseta, Alvaro; Rahman, Rafa; Skolasky, Richard L; Reidler, Jay S; Kebaish, Khaled M; Neuman, Brian J. SRS-22r legacy scores can be accurately translated to PROMIS scores in adult spinal deformity patients. <i>The spine journal : official journal of the North American Spine Society</i> , 2019, , 101130732, . <a href="https://dx.doi.org/10.1016/j.spinee.2019.09.006">https://dx.doi.org/10.1016/j.spinee.2019.09.006</a> .                                                                                                                                                                                                                                                                       |
| #3702 | Schoutens 2019 | Schoutens, Carlijn; Cushman, Daniel M; McCormick, Zachary L; Conger, Aaron; van Royen, Barend J; Spiker, William R. Outcomes of Nonsurgical Treatments for Symptomatic Adult Degenerative Scoliosis: A Systematic Review. <i>Pain medicine (Malden, Mass.)</i> , 2019, , 100894201, . <a href="https://dx.doi.org/10.1093/pm/pnz253">https://dx.doi.org/10.1093/pm/pnz253</a> .                                                                                                                                                                                                                                                                                                                              |
| #3704 | Agarwal 2019   | Agarwal, Nitin; Angriman, Federico; Golaschmiat, Ezequiel; Zhou, James; Kanter, Adam S; Okonkwo, David U; Passias, Peter G; Protopsaltis, Themistocles; Lafage, Virginie; Lafage, Renaud; Schwab, Frank; Bess, Shay; Ames, Christopher; Smith, Justin S; Shaffrey, Christopher I; Burton, Douglas; Hamilton, D Kojo; International Spine Study Group. Relationship between body mass index and sagittal vertical axis change as well as health-related quality of life in 564 patients after deformity surgery. <i>Journal of neurosurgery. Spine</i> , 2019, , 101223545, 44567. <a href="https://dx.doi.org/10.3171/2019.4.SPINE18485">https://dx.doi.org/10.3171/2019.4.SPINE18485</a> .                  |
| #3707 | Pierce 2019    | Pierce, Katherine E; Passias, Peter G; Aias, Maddy; Brown, Avery E; Bortz, Cole A; Lafage, Renaud; Lafage, Virginie; Ames, Christopher; Burton, Douglas C; Hart, Robert; Hamilton, Kojo; Kelly, Michael; Hostin, Richard; Bess, Shay; Klineberg, Eric; Line, Breton; Shaffrey, Christopher; Mummaneni, Praveen; Smith, Justin S; Schwab, Frank A; International Spine Study Group (ISSG). Does Patient Frailty Status Influence Recovery Following Spinal Fusion for Adult Spinal Deformity?: An Analysis of Patients With 3-Year Follow-up. <i>Spine</i> , 2019, , 7610646, ukx, 7610649, . <a href="https://dx.doi.org/10.1097/BRS.0000000000003288">https://dx.doi.org/10.1097/BRS.0000000000003288</a> . |
| #3711 | Cheung 2019    | Cheung, Jason Pui Yin; Cheung, Prudence Wing Hang; Yeng, Wing Cheung; Chan, Lawrence Chi Kwan. Does Curve Regression Occur During Underarm Bracing in Patients with Adolescent Idiopathic Scoliosis?. <i>Clinical orthopaedics and related research</i> , 2019, , 0075674, dfy, . <a href="https://dx.doi.org/10.1097/CORR.0000000000000989">https://dx.doi.org/10.1097/CORR.0000000000000989</a> .                                                                                                                                                                                                                                                                                                          |
| #3713 | Wang 2019      | Wang, Yongqiang; Gao, Ang; Hudabardiy, Enhamujiang; Yu, Miao. Curve progression in de novo degenerative lumbar scoliosis combined with degenerative segment disease after short-segment fusion. <i>European spine journal : official publication of the European Spine Society, the European Spinal Deformity Society, and the European Section of the Cervical Spine Research Society</i> , 2019, , 9301980, b9y, . <a href="https://dx.doi.org/10.1007/s00586-019-06173-0">https://dx.doi.org/10.1007/s00586-019-06173-0</a> .                                                                                                                                                                             |

|       |             |                                                                                                                                                                                                                                                                                                                                                                                                                                |
|-------|-------------|--------------------------------------------------------------------------------------------------------------------------------------------------------------------------------------------------------------------------------------------------------------------------------------------------------------------------------------------------------------------------------------------------------------------------------|
| #3717 | Bae 2019    | Bae, Seong Ho; Son, Seung Min; Shin, Won Chul; Goh, Tae Sik; Lee, Jung Sub. Validation of the Korean Version of the Body Image Disturbance Questionnaire-Scoliosis. Spine, 2019, , 7610646, uxk, 7610649, . <a href="https://dx.doi.org/10.1097/BRS.0000000000003328">https://dx.doi.org/10.1097/BRS.0000000000003328</a> .                                                                                                    |
| #3733 | Ohashi 2020 | Ohashi, Masayuki; Bastrom, Tracey P; Marks, Michelle C; Bartley, Carrie E; Newton, Peter O. The Benefits of Sparing Lumbar Motion Segments in Spinal Fusion for Adolescent Idiopathic Scoliosis are Evident at 10 years Postoperatively. Spine, 2020, , 7610646, uxk, 7610649, . <a href="https://dx.doi.org/10.1097/BRS.0000000000003373">https://dx.doi.org/10.1097/BRS.0000000000003373</a> .                               |
| #3735 | Newton 2020 | Newton, Peter O; Ohashi, Masayuki; Bastrom, Tracey P; Bartley, Carrie E; Yaszay, Burt; Marks, Michelle C; Betz, Randal; Lenke, Lawrence G; Clements, David. Prospective 10-year follow-up assessment of spinal fusions for thoracic AIS: radiographic and clinical outcomes. Spine deformity, 2020, , 101603979, . <a href="https://dx.doi.org/10.1007/s43390-019-00015-1">https://dx.doi.org/10.1007/s43390-019-00015-1</a> . |
